# Supplementary material for: CTCF looping is established during gastrulation in medaka embryos
Source: HighWire-hosted journal article supplement (doi:10.1101/gr.269951.120), 2021-05-18
Supplement: Supplemental_Data_1.xlsx [file Supplemental_Data_1.xlsx]

## Sheet: Sheet1
Supplemental Data 1
High-scoring chains (score>9) and their anchor points (i.e. orthologs between medaka and zebrafish) are presented.
Orthologous medaka and zebrafish gene pair is shown in a single line, and the columns indicate Ensembl protein ID (medaka), Ensembl gene ID, chromosome, left position, right position, strand, Ensembl protein ID (zebrafish), Ensembl gene ID, chromosome, left position, right position, and strand.
Chain ID: 1	Score: 34.50	Medaka: chr20:15,529,052-16,425,636 (0.90 Mb)	Zebrafish: chr24:20,675,156-22,542,131 (1.87 Mb)
ENSORLP00000010857	ENSORLG00000008654	20	15529052	15533679	1	ENSDARP00000101853	ENSDARG00000075627	24	22535403	22542131	-1
ENSORLP00000010884	ENSORLG00000008674	20	15541154	15542344	1	ENSDARP00000110799	ENSDARG00000058318	24	22516721	22521354	-1
ENSORLP00000010918	ENSORLG00000008698	20	15555147	15559523	1	ENSDARP00000085685	ENSDARG00000062837	24	22473062	22510980	-1
ENSORLP00000010937	ENSORLG00000008713	20	15561501	15569340	1	ENSDARP00000107498	ENSDARG00000086161	24	22451165	22468954	-1
ENSORLP00000010944	ENSORLG00000008718	20	15574342	15576486	1	ENSDARP00000085529	ENSDARG00000062758	24	22421084	22435136	-1
ENSORLP00000010960	ENSORLG00000008730	20	15604248	15609212	1	ENSDARP00000002466	ENSDARG00000019371	24	22358980	22416554	-1
ENSORLP00000011000	ENSORLG00000008758	20	15615878	15630384	-1	ENSDARP00000048272	ENSDARG00000031637	24	22328524	22354935	1
ENSORLP00000011003	ENSORLG00000008761	20	15673698	15674357	1	ENSDARP00000096695	ENSDARG00000071579	24	22295404	22297040	-1
ENSORLP00000011009	ENSORLG00000008765	20	15674996	15677223	-1	ENSDARP00000017531	ENSDARG00000002779	24	22292233	22294374	1
ENSORLP00000011016	ENSORLG00000008770	20	15679221	15681495	-1	ENSDARP00000066676	ENSDARG00000045342	24	22285134	22288187	1
ENSORLP00000011028	ENSORLG00000008783	20	15684456	15693050	1	ENSDARP00000046210	ENSDARG00000029177	24	22254678	22279439	-1
ENSORLP00000011033	ENSORLG00000008788	20	15694341	15697147	-1	ENSDARP00000096703	ENSDARG00000071583	24	22248712	22250677	1
ENSORLP00000011048	ENSORLG00000008802	20	15702410	15704875	-1	ENSDARP00000016158	ENSDARG00000010516	24	22230333	22233437	1
ENSORLP00000011073	ENSORLG00000008821	20	15708111	15714598	1	ENSDARP00000103890	ENSDARG00000078109	24	22208946	22228205	-1
ENSORLP00000011079	ENSORLG00000008826	20	15717227	15718255	1	ENSDARP00000126429	ENSDARG00000062934	24	22194258	22195283	-1
ENSORLP00000011104	ENSORLG00000008849	20	15722186	15730402	-1	ENSDARP00000085962	ENSDARG00000062948	24	22164157	22185334	1
ENSORLP00000011144	ENSORLG00000008885	20	15737498	15744561	-1	ENSDARP00000022588	ENSDARG00000016496	24	22122559	22146309	1
ENSORLP00000011167	ENSORLG00000008902	20	15747055	15750664	1	ENSDARP00000099863	ENSDARG00000077955	24	22112163	22119685	-1
ENSORLP00000011342	ENSORLG00000009034	20	15761767	15798858	1	ENSDARP00000127990	ENSDARG00000077492	24	21980347	22077198	-1
ENSORLP00000011368	ENSORLG00000009065	20	15801910	15807088	-1	ENSDARP00000105651	ENSDARG00000088232	24	21954643	21969449	1
ENSORLP00000011385	ENSORLG00000009080	20	15808984	15812986	1	ENSDARP00000003902	ENSDARG00000004647	24	21938910	21951482	-1
ENSORLP00000011399	ENSORLG00000009087	20	15851621	15862367	1	ENSDARP00000098383	ENSDARG00000074335	24	21815741	21849509	-1
ENSORLP00000011412	ENSORLG00000009097	20	15867235	15875397	-1	ENSDARP00000126407	ENSDARG00000077431	24	21801070	21810435	1
ENSORLP00000011435	ENSORLG00000009116	20	15877304	15879849	-1	ENSDARP00000128760	ENSDARG00000027825	24	21783462	21790438	1
ENSORLP00000011475	ENSORLG00000009146	20	15916832	15920787	1	ENSDARP00000014201	ENSDARG00000003899	24	21731401	21739103	-1
ENSORLP00000011512	ENSORLG00000009175	20	15920381	15938340	-1	ENSDARP00000096716	ENSDARG00000027851	24	21700741	21728028	1
ENSORLP00000011548	ENSORLG00000009211	20	15939113	15953643	1	ENSDARP00000106901	ENSDARG00000016093	24	21647271	21698443	-1
ENSORLP00000011570	ENSORLG00000009228	20	15991671	16022648	-1	ENSDARP00000109548	ENSDARG00000032131	24	21577012	21614157	1
ENSORLP00000011577	ENSORLG00000009234	20	16026886	16028621	-1	ENSDARP00000117043	ENSDARG00000089919	24	21568668	21572327	1
ENSORLP00000011709	ENSORLG00000009338	20	16100042	16101633	1	ENSDARP00000114560	ENSDARG00000093044	24	21518780	21523502	-1
ENSORLP00000011730	ENSORLG00000009354	20	16150091	16185864	1	ENSDARP00000116281	ENSDARG00000059058	24	21316777	21416486	-1
ENSORLP00000011744	ENSORLG00000009365	20	16200354	16202614	-1	ENSDARP00000087023	ENSDARG00000063387	24	21268350	21274646	1
ENSORLP00000011770	ENSORLG00000009388	20	16204736	16214886	1	ENSDARP00000107238	ENSDARG00000059097	24	21252617	21265225	-1
ENSORLP00000011803	ENSORLG00000009415	20	16244540	16249070	-1	ENSDARP00000012991	ENSDARG00000019125	24	21183757	21190123	1
ENSORLP00000011826	ENSORLG00000009434	20	16251828	16256071	-1	ENSDARP00000117773	ENSDARG00000005139	24	21169169	21179439	1
ENSORLP00000011900	ENSORLG00000009494	20	16284200	16301236	1	ENSDARP00000083861	ENSDARG00000071673	24	21059256	21139926	-1
ENSORLP00000012031	ENSORLG00000009593	20	16306576	16314374	1	ENSDARP00000048939	ENSDARG00000001909	24	21027411	21049407	-1
ENSORLP00000012163	ENSORLG00000009694	20	16316041	16327807	-1	ENSDARP00000117474	ENSDARG00000059123	24	20982109	21024895	1
ENSORLP00000012197	ENSORLG00000009723	20	16332897	16346319	1	ENSDARP00000098016	ENSDARG00000075825	24	20941559	20977878	-1
ENSORLP00000012255	ENSORLG00000009768	20	16390087	16395342	1	ENSDARP00000121988	ENSDARG00000002396	24	20802829	20816802	-1
ENSORLP00000012280	ENSORLG00000009788	20	16396142	16398336	1	ENSDARP00000020711	ENSDARG00000010169	24	20797718	20801170	-1
ENSORLP00000012367	ENSORLG00000009854	20	16399498	16425636	1	ENSDARP00000115525	ENSDARG00000027500	24	20675156	20761244	-1
Chain ID: 2	Score: 25.75	Medaka: chr16:16,370,705-16,983,098 (0.61 Mb)	Zebrafish: chr16:14,022,122-15,628,755 (1.61 Mb)
ENSORLP00000014145	ENSORLG00000011290	16	16370705	16370863	1	ENSDARP00000084654	ENSDARG00000062390	16	15627868	15628755	-1
ENSORLP00000014165	ENSORLG00000011308	16	16373682	16386359	-1	ENSDARP00000111824	ENSDARG00000004806	16	15611766	15622079	1
ENSORLP00000014181	ENSORLG00000011322	16	16389212	16396482	-1	ENSDARP00000084624	ENSDARG00000062385	16	15573838	15596909	1
ENSORLP00000014188	ENSORLG00000011328	16	16398320	16400761	1	ENSDARP00000113462	ENSDARG00000062374	16	15561535	15569046	-1
ENSORLP00000014236	ENSORLG00000011368	16	16408697	16426096	1	ENSDARP00000117502	ENSDARG00000076804	16	15465553	15541287	-1
ENSORLP00000014253	ENSORLG00000011381	16	16430977	16434928	-1	ENSDARP00000074792	ENSDARG00000057626	16	15437402	15457575	1
ENSORLP00000014278	ENSORLG00000011402	16	16437451	16440219	1	ENSDARP00000047451	ENSDARG00000031775	16	15425963	15431585	-1
ENSORLP00000014285	ENSORLG00000011407	16	16446685	16449606	1	ENSDARP00000084810	ENSDARG00000062462	16	15379263	15395257	-1
ENSORLP00000014290	ENSORLG00000011412	16	16466901	16470304	1	ENSDARP00000120819	ENSDARG00000057652	16	15354601	15364074	-1
ENSORLP00000014298	ENSORLG00000011418	16	16473024	16479845	1	ENSDARP00000060003	ENSDARG00000040944	16	15320790	15346418	-1
ENSORLP00000014322	ENSORLG00000011438	16	16541556	16551918	-1	ENSDARP00000103640	ENSDARG00000022807	16	15176323	15204388	1
ENSORLP00000014337	ENSORLG00000011448	16	16594192	16624193	1	ENSDARP00000094658	ENSDARG00000070620	16	14930567	15059419	-1
ENSORLP00000014378	ENSORLG00000011481	16	16647117	16666681	1	ENSDARP00000123279	ENSDARG00000004561	16	14772197	14861170	-1
ENSORLP00000014402	ENSORLG00000011496	16	16674138	16680324	1	ENSDARP00000119475	ENSDARG00000070624	16	14715030	14755587	-1
ENSORLP00000014408	ENSORLG00000011501	16	16707141	16711208	1	ENSDARP00000094670	ENSDARG00000070626	16	14635130	14665652	-1
ENSORLP00000014420	ENSORLG00000011512	16	16717844	16726043	-1	ENSDARP00000067740	ENSDARG00000046079	16	14587968	14617756	1
ENSORLP00000014561	ENSORLG00000011616	16	16787262	16788555	1	ENSDARP00000022030	ENSDARG00000013371	16	14545498	14560959	-1
ENSORLP00000014582	ENSORLG00000011631	16	16789561	16793142	1	ENSDARP00000074846	ENSDARG00000057680	16	14509915	14535777	-1
ENSORLP00000014618	ENSORLG00000011659	16	16794770	16802029	-1	ENSDARP00000105117	ENSDARG00000010411	16	14490171	14506672	1
ENSORLP00000014624	ENSORLG00000011664	16	16819195	16821272	1	ENSDARP00000123341	ENSDARG00000090560	16	14421592	14434023	-1
ENSORLP00000014673	ENSORLG00000011705	16	16829636	16830538	-1	ENSDARP00000011293	ENSDARG00000015734	16	14411942	14416881	1
ENSORLP00000014689	ENSORLG00000011722	16	16839034	16847705	-1	ENSDARP00000110565	ENSDARG00000087439	16	14372406	14379708	1
ENSORLP00000014696	ENSORLG00000011724	16	16848484	16851579	-1	ENSDARP00000055159	ENSDARG00000037859	16	14359727	14366281	1
ENSORLP00000014716	ENSORLG00000011742	16	16868480	16876702	-1	ENSDARP00000128128	ENSDARG00000074829	16	14272315	14310785	1
ENSORLP00000014838	ENSORLG00000011838	16	16894851	16899958	1	ENSDARP00000008780	ENSDARG00000037861	16	14228375	14238716	-1
ENSORLP00000014885	ENSORLG00000011883	16	16913046	16941193	1	ENSDARP00000074926	ENSDARG00000057729	16	14085770	14220460	-1
ENSORLP00000014935	ENSORLG00000011919	16	16945763	16954238	1	ENSDARP00000104626	ENSDARG00000014496	16	14044605	14066970	-1
ENSORLP00000014957	ENSORLG00000011940	16	16954766	16956607	-1	ENSDARP00000123441	ENSDARG00000088023	16	14031217	14044196	1
ENSORLP00000014971	ENSORLG00000011948	16	16977537	16983098	-1	ENSDARP00000060036	ENSDARG00000040971	16	14022122	14025830	1
Chain ID: 3	Score: 24.50	Medaka: chr22:512,818-1,109,918 (0.60 Mb)	Zebrafish: chr13:36,442,231-37,392,559 (0.95 Mb)
ENSORLP00000011138	ENSORLG00000008880	22	512818	523802	-1	ENSDARP00000118027	ENSDARG00000002332	13	37376619	37392559	1
ENSORLP00000011153	ENSORLG00000008892	22	555017	559005	-1	ENSDARP00000004160	ENSDARG00000019487	13	37324992	37334152	1
ENSORLP00000011161	ENSORLG00000008897	22	604418	611290	1	ENSDARP00000048738	ENSDARG00000039123	13	37271551	37312888	-1
ENSORLP00000011230	ENSORLG00000008955	22	633388	642951	1	ENSDARP00000013286	ENSDARG00000002197	13	37248788	37264884	-1
ENSORLP00000011271	ENSORLG00000008987	22	652643	667887	1	ENSDARP00000125949	ENSDARG00000060298	13	37211080	37239751	-1
ENSORLP00000011283	ENSORLG00000008998	22	671075	676432	1	ENSDARP00000106287	ENSDARG00000006196	13	37186138	37199746	-1
ENSORLP00000011353	ENSORLG00000009054	22	677624	684255	-1	ENSDARP00000079665	ENSDARG00000060481	13	37166705	37185899	1
ENSORLP00000011370	ENSORLG00000009067	22	701195	705600	1	ENSDARP00000034684	ENSDARG00000039125	13	37108251	37162277	-1
ENSORLP00000011406	ENSORLG00000009092	22	707694	713547	1	ENSDARP00000044356	ENSDARG00000017329	13	37095213	37103410	-1
ENSORLP00000011419	ENSORLG00000009104	22	714000	716312	-1	ENSDARP00000014390	ENSDARG00000012072	13	37082765	37093325	1
ENSORLP00000011434	ENSORLG00000009117	22	718363	722808	1	ENSDARP00000079733	ENSDARG00000060500	13	37068834	37082253	-1
ENSORLP00000011459	ENSORLG00000009137	22	724675	746779	1	ENSDARP00000079754	ENSDARG00000060506	13	37042181	37065157	-1
ENSORLP00000011490	ENSORLG00000009158	22	759787	763176	1	ENSDARP00000057154	ENSDARG00000039130	13	37015047	37023459	-1
ENSORLP00000011506	ENSORLG00000009172	22	764302	767987	-1	ENSDARP00000007824	ENSDARG00000020311	13	36997543	37007338	1
ENSORLP00000011528	ENSORLG00000009189	22	774362	776978	1	ENSDARP00000100661	ENSDARG00000077850	13	36971064	36983741	-1
ENSORLP00000011533	ENSORLG00000009195	22	780385	783733	1	ENSDARP00000033740	ENSDARG00000028321	13	36959768	36968009	-1
ENSORLP00000011626	ENSORLG00000009268	22	802909	805645	1	ENSDARP00000043311	ENSDARG00000029818	13	36932521	36936246	-1
ENSORLP00000011716	ENSORLG00000009340	22	839468	855354	1	ENSDARP00000107559	ENSDARG00000078185	13	36848053	36927848	-1
ENSORLP00000011721	ENSORLG00000009348	22	862421	866678	1	ENSDARP00000079302	ENSDARG00000060320	13	36811073	36840602	-1
ENSORLP00000011810	ENSORLG00000009419	22	885041	923603	1	ENSDARP00000123299	ENSDARG00000007219	13	36723702	36792844	-1
ENSORLP00000011815	ENSORLG00000009428	22	924955	928323	1	ENSDARP00000057163	ENSDARG00000039136	13	36714191	36720742	-1
ENSORLP00000011835	ENSORLG00000009443	22	969511	1041772	1	ENSDARP00000090977	ENSDARG00000004931	13	36598583	36666460	-1
ENSORLP00000011854	ENSORLG00000009460	22	1049192	1059645	1	ENSDARP00000057184	ENSDARG00000013491	13	36561633	36586064	-1
ENSORLP00000011877	ENSORLG00000009478	22	1067350	1072047	1	ENSDARP00000044114	ENSDARG00000034734	13	36537063	36543038	-1
ENSORLP00000011897	ENSORLG00000009495	22	1073254	1098761	1	ENSDARP00000006859	ENSDARG00000011819	13	36456528	36535916	-1
ENSORLP00000011955	ENSORLG00000009533	22	1104973	1109918	1	ENSDARP00000114480	ENSDARG00000039150	13	36442231	36450595	-1
Chain ID: 4	Score: 23.25	Medaka: chr21:23,850,923-25,016,923 (1.17 Mb)	Zebrafish: chr9:1,014,449-3,878,770 (2.86 Mb)
ENSORLP00000021580	ENSORLG00000017248	21	23850923	23906628	1	ENSDARP00000017756	ENSDARG00000006892	9	3752080	3878770	-1
ENSORLP00000021585	ENSORLG00000017252	21	23927876	23929335	1	ENSDARP00000093674	ENSDARG00000076571	9	3664707	3668240	-1
ENSORLP00000021604	ENSORLG00000017268	21	23939416	23951426	1	ENSDARP00000122377	ENSDARG00000093411	9	3618418	3649709	-1
ENSORLP00000021626	ENSORLG00000017283	21	23968669	23973599	-1	ENSDARP00000062264	ENSDARG00000042467	9	3545727	3605095	1
ENSORLP00000021635	ENSORLG00000017293	21	23977170	23980133	-1	ENSDARP00000003665	ENSDARG00000017359	9	3516346	3531328	1
ENSORLP00000021640	ENSORLG00000017298	21	23980629	23987252	1	ENSDARP00000121682	ENSDARG00000074909	9	3497674	3515703	-1
ENSORLP00000021641	ENSORLG00000017299	21	23989453	23990829	1	ENSDARP00000093650	ENSDARG00000095577	9	3487368	3492955	-1
ENSORLP00000021782	ENSORLG00000017416	21	24128718	24132327	1	ENSDARP00000022009	ENSDARG00000013128	9	3133571	3147939	-1
ENSORLP00000021802	ENSORLG00000017434	21	24132851	24157323	-1	ENSDARP00000087453	ENSDARG00000063580	9	3054196	3123330	1
ENSORLP00000021833	ENSORLG00000017462	21	24201137	24220913	1	ENSDARP00000093598	ENSDARG00000006978	9	2895411	2934525	-1
ENSORLP00000021846	ENSORLG00000017471	21	24224864	24228260	1	ENSDARP00000117288	ENSDARG00000077620	9	2878608	2890660	-1
ENSORLP00000021848	ENSORLG00000017474	21	24265868	24273060	-1	ENSDARP00000107440	ENSDARG00000001549	9	2760923	2775256	1
ENSORLP00000021870	ENSORLG00000017492	21	24333289	24335011	1	ENSDARP00000110885	ENSDARG00000010462	9	2591033	2592376	-1
ENSORLP00000021917	ENSORLG00000017522	21	24416953	24435329	-1	ENSDARP00000062291	ENSDARG00000023903	9	2339945	2378947	1
ENSORLP00000021929	ENSORLG00000017528	21	24438794	24440180	-1	ENSDARP00000015997	ENSDARG00000017775	9	2329279	2335754	1
ENSORLP00000021933	ENSORLG00000017531	21	24538379	24545934	-1	ENSDARP00000087619	ENSDARG00000063646	9	2017163	2035718	1
ENSORLP00000021937	ENSORLG00000017534	21	24590833	24592238	-1	ENSDARP00000076765	ENSDARG00000059255	9	1993862	1996210	1
ENSORLP00000021938	ENSORLG00000017536	21	24601819	24602905	1	ENSDARP00000076775	ENSDARG00000059263	9	1973132	1975379	-1
ENSORLP00000021941	ENSORLG00000017538	21	24606914	24608293	1	ENSDARP00000076780	ENSDARG00000059267	9	1967099	1968792	-1
ENSORLP00000021943	ENSORLG00000017540	21	24611625	24613195	1	ENSDARP00000109229	ENSDARG00000057859	9	1958988	1960732	-1
ENSORLP00000021948	ENSORLG00000017544	21	24614901	24616114	1	ENSDARP00000076790	ENSDARG00000059274	9	1955331	1956435	-1
ENSORLP00000021953	ENSORLG00000017548	21	24626722	24627805	1	ENSDARP00000076791	ENSDARG00000059276	9	1940413	1941575	-1
ENSORLP00000021951	ENSORLG00000017546	21	24635889	24637177	1	ENSDARP00000093704	ENSDARG00000059280	9	1928485	1929889	-1
ENSORLP00000021971	ENSORLG00000017561	21	24749611	24754284	1	ENSDARP00000112646	ENSDARG00000059351	9	1682882	1693095	-1
ENSORLP00000021980	ENSORLG00000017568	21	24759350	24762311	-1	ENSDARP00000062853	ENSDARG00000042824	9	1643787	1669893	1
ENSORLP00000021992	ENSORLG00000017577	21	24769940	24793812	1	ENSDARP00000062849	ENSDARG00000042821	9	1578416	1629231	-1
ENSORLP00000022010	ENSORLG00000017589	21	24874708	24905992	1	ENSDARP00000107551	ENSDARG00000063730	9	1380194	1423143	-1
ENSORLP00000022018	ENSORLG00000017598	21	24912716	24917345	-1	ENSDARP00000115290	ENSDARG00000076718	9	1354439	1359527	1
ENSORLP00000022045	ENSORLG00000017616	21	24933292	24957559	-1	ENSDARP00000098297	ENSDARG00000074197	9	1126883	1286121	1
ENSORLP00000022046	ENSORLG00000017619	21	24963652	24966441	1	ENSDARP00000112670	ENSDARG00000063704	9	1110655	1111725	-1
ENSORLP00000022051	ENSORLG00000017623	21	24979319	24984073	1	ENSDARP00000097796	ENSDARG00000078199	9	1062682	1075035	-1
ENSORLP00000022063	ENSORLG00000017632	21	24990033	25003411	-1	ENSDARP00000093770	ENSDARG00000031413	9	1037130	1051028	1
ENSORLP00000022073	ENSORLG00000017640	21	25006694	25016923	-1	ENSDARP00000120021	ENSDARG00000077192	9	1014449	1035352	1
Chain ID: 5	Score: 22.50	Medaka: chr9:12,314,630-12,947,694 (0.63 Mb)	Zebrafish: chr5:21,127,206-22,645,300 (1.52 Mb)
ENSORLP00000008588	ENSORLG00000006835	9	12314630	12328246	-1	ENSDARP00000087617	ENSDARG00000005104	5	22606915	22645300	1
ENSORLP00000008618	ENSORLG00000006858	9	12424099	12442063	1	ENSDARP00000083072	ENSDARG00000061819	5	22411158	22461628	-1
ENSORLP00000008628	ENSORLG00000006867	9	12448896	12450094	-1	ENSDARP00000108404	ENSDARG00000090890	5	22372835	22373896	1
ENSORLP00000008636	ENSORLG00000006873	9	12464031	12466299	1	ENSDARP00000123219	ENSDARG00000035595	5	22269795	22273419	-1
ENSORLP00000008662	ENSORLG00000006895	9	12468142	12474518	-1	ENSDARP00000004923	ENSDARG00000008032	5	22237299	22262926	1
ENSORLP00000008685	ENSORLG00000006917	9	12477076	12477894	-1	ENSDARP00000122383	ENSDARG00000092834	5	22224981	22225642	1
ENSORLP00000008816	ENSORLG00000007016	9	12488612	12509596	-1	ENSDARP00000026454	ENSDARG00000035598	5	22149781	22199564	1
ENSORLP00000008833	ENSORLG00000007030	9	12525783	12543522	-1	ENSDARP00000129745	ENSDARG00000056780	5	22060737	22073652	1
ENSORLP00000008892	ENSORLG00000007083	9	12552106	12557942	-1	ENSDARP00000089497	ENSDARG00000056833	5	21926143	21949016	1
ENSORLP00000008957	ENSORLG00000007138	9	12572107	12573845	1	ENSDARP00000026766	ENSDARG00000003144	5	21899771	21906240	-1
ENSORLP00000008963	ENSORLG00000007145	9	12577044	12577517	-1	ENSDARP00000112153	ENSDARG00000086374	5	21895629	21896102	1
ENSORLP00000008974	ENSORLG00000007156	9	12578784	12581330	-1	ENSDARP00000073880	ENSDARG00000056855	5	21886724	21891739	1
ENSORLP00000009072	ENSORLG00000007234	9	12702013	12708125	1	ENSDARP00000081315	ENSDARG00000057017	5	21753167	21772069	-1
ENSORLP00000009123	ENSORLG00000007273	9	12715744	12720537	-1	ENSDARP00000083252	ENSDARG00000061901	5	21716878	21736272	1
ENSORLP00000009168	ENSORLG00000007310	9	12722764	12735377	1	ENSDARP00000083314	ENSDARG00000061915	5	21669758	21715639	-1
ENSORLP00000009184	ENSORLG00000007323	9	12736813	12741349	-1	ENSDARP00000051613	ENSDARG00000035605	5	21651381	21662296	1
ENSORLP00000009204	ENSORLG00000007336	9	12743233	12745532	1	ENSDARP00000083337	ENSDARG00000061921	5	21634914	21645019	-1
ENSORLP00000009264	ENSORLG00000007391	9	12750475	12759771	1	ENSDARP00000121795	ENSDARG00000061941	5	21579475	21616638	-1
ENSORLP00000009268	ENSORLG00000007394	9	12768525	12769955	-1	ENSDARP00000121787	ENSDARG00000090797	5	21495339	21536223	1
ENSORLP00000009293	ENSORLG00000007414	9	12865398	12871635	-1	ENSDARP00000019792	ENSDARG00000004130	5	21277737	21292650	1
ENSORLP00000009299	ENSORLG00000007420	9	12872083	12875353	1	ENSDARP00000089565	ENSDARG00000068344	5	21273089	21277313	-1
ENSORLP00000009311	ENSORLG00000007432	9	12875607	12880616	-1	ENSDARP00000051615	ENSDARG00000035606	5	21262520	21271941	1
ENSORLP00000009358	ENSORLG00000007463	9	12882789	12891544	-1	ENSDARP00000083401	ENSDARG00000061960	5	21231413	21255449	1
ENSORLP00000009396	ENSORLG00000007491	9	12893315	12895809	1	ENSDARP00000122490	ENSDARG00000017115	5	21222682	21228218	-1
ENSORLP00000009503	ENSORLG00000007579	9	12897251	12905197	-1	ENSDARP00000083447	ENSDARG00000061968	5	21197250	21217843	1
ENSORLP00000009507	ENSORLG00000007587	9	12921773	12923346	1	ENSDARP00000020367	ENSDARG00000010591	5	21169527	21183091	-1
ENSORLP00000009716	ENSORLG00000007751	9	12924875	12947694	-1	ENSDARP00000083511	ENSDARG00000061994	5	21127206	21165852	1
Chain ID: 6	Score: 22.25	Medaka: chr16:12,606,953-13,238,012 (0.63 Mb)	Zebrafish: chr16:20,494,370-23,559,583 (3.07 Mb)
ENSORLP00000008818	ENSORLG00000007020	16	12606953	12616512	1	ENSDARP00000104696	ENSDARG00000002006	16	20494370	20526398	1
ENSORLP00000008854	ENSORLG00000007046	16	12620785	12705409	-1	ENSDARP00000083251	ENSDARG00000061904	16	20566584	20917939	-1
ENSORLP00000008874	ENSORLG00000007067	16	12710812	12716948	1	ENSDARP00000073754	ENSDARG00000056750	16	20970618	20977654	1
ENSORLP00000008886	ENSORLG00000007079	16	12728728	12738962	1	ENSDARP00000100132	ENSDARG00000074307	16	20986985	21108341	1
ENSORLP00000009093	ENSORLG00000007248	16	12838336	12841546	1	ENSDARP00000114832	ENSDARG00000040717	16	21660888	21663799	1
ENSORLP00000009178	ENSORLG00000007319	16	12924657	12934578	1	ENSDARP00000020838	ENSDARG00000009023	16	22202423	22239191	1
ENSORLP00000009206	ENSORLG00000007343	16	12956601	12961859	1	ENSDARP00000005715	ENSDARG00000020529	16	22255629	22281416	1
ENSORLP00000009251	ENSORLG00000007381	16	12963108	12970064	1	ENSDARP00000019894	ENSDARG00000019692	16	22286680	22322292	1
ENSORLP00000009275	ENSORLG00000007400	16	12976022	12981540	-1	ENSDARP00000059622	ENSDARG00000040698	16	22356088	22381886	-1
ENSORLP00000009294	ENSORLG00000007415	16	12981999	12983095	1	ENSDARP00000059618	ENSDARG00000040695	16	22382879	22391837	1
ENSORLP00000009331	ENSORLG00000007444	16	12986121	13010199	-1	ENSDARP00000027417	ENSDARG00000011845	16	22406138	22582240	-1
ENSORLP00000009387	ENSORLG00000007488	16	13012752	13018040	1	ENSDARP00000073441	ENSDARG00000056480	16	22587101	22604664	1
ENSORLP00000009415	ENSORLG00000007509	16	13021231	13055990	-1	ENSDARP00000094406	ENSDARG00000070536	16	22620497	22773814	-1
ENSORLP00000009424	ENSORLG00000007516	16	13067064	13080510	1	ENSDARP00000073799	ENSDARG00000056793	16	22823250	22884921	1
ENSORLP00000009476	ENSORLG00000007562	16	13082194	13093419	-1	ENSDARP00000040726	ENSDARG00000056856	16	22891033	22940101	-1
ENSORLP00000009508	ENSORLG00000007586	16	13096890	13108838	1	ENSDARP00000003030	ENSDARG00000007959	16	22955505	22973406	1
ENSORLP00000009523	ENSORLG00000007597	16	13115192	13116836	1	ENSDARP00000052661	ENSDARG00000036254	16	22980383	22981639	1
ENSORLP00000009534	ENSORLG00000007608	16	13120119	13121655	1	ENSDARP00000005174	ENSDARG00000007009	16	22989314	22990912	1
ENSORLP00000009546	ENSORLG00000007617	16	13127640	13129143	1	ENSDARP00000046765	ENSDARG00000031337	16	22994654	22996815	1
ENSORLP00000009549	ENSORLG00000007620	16	13130864	13131810	1	ENSDARP00000073839	ENSDARG00000056819	16	22999871	23001403	1
ENSORLP00000009601	ENSORLG00000007660	16	13142489	13149746	1	ENSDARP00000052659	ENSDARG00000000906	16	23018947	23060542	1
ENSORLP00000009622	ENSORLG00000007677	16	13157273	13158669	-1	ENSDARP00000059238	ENSDARG00000040474	16	23119712	23122366	-1
ENSORLP00000009636	ENSORLG00000007692	16	13159808	13164060	-1	ENSDARP00000123074	ENSDARG00000092158	16	23124810	23131485	-1
ENSORLP00000009687	ENSORLG00000007734	16	13177226	13187980	-1	ENSDARP00000027114	ENSDARG00000006151	16	23229330	23270208	-1
ENSORLP00000009741	ENSORLG00000007774	16	13205737	13223521	1	ENSDARP00000119126	ENSDARG00000040482	16	23389319	23501897	1
ENSORLP00000009749	ENSORLG00000007783	16	13227650	13230283	1	ENSDARP00000112180	ENSDARG00000040485	16	23510992	23524836	1
ENSORLP00000009871	ENSORLG00000007872	16	13231534	13238012	-1	ENSDARP00000123608	ENSDARG00000056892	16	23530564	23559583	-1
Chain ID: 7	Score: 21.25	Medaka: chr8:2,708,333-3,759,133 (1.05 Mb)	Zebrafish: chr3:29,609,728-31,230,286 (1.62 Mb)
ENSORLP00000001729	ENSORLG00000001395	8	2708333	2716505	1	ENSDARP00000012720	ENSDARG00000006468	3	29609728	29619294	1
ENSORLP00000001735	ENSORLG00000001401	8	2717920	2726650	1	ENSDARP00000094368	ENSDARG00000038012	3	29620402	29634710	1
ENSORLP00000001746	ENSORLG00000001410	8	2730374	2735280	-1	ENSDARP00000055407	ENSDARG00000038011	3	29641067	29659899	-1
ENSORLP00000001750	ENSORLG00000001415	8	2803356	2804801	1	ENSDARP00000097945	ENSDARG00000014477	3	29752108	29753550	1
ENSORLP00000001787	ENSORLG00000001449	8	2814759	2820110	1	ENSDARP00000011011	ENSDARG00000021257	3	29793113	29805963	1
ENSORLP00000001822	ENSORLG00000001470	8	3048510	3051145	-1	ENSDARP00000003700	ENSDARG00000003599	3	30018405	30022386	-1
ENSORLP00000001855	ENSORLG00000001500	8	3053400	3057756	-1	ENSDARP00000005911	ENSDARG00000007449	3	30024770	30039793	-1
ENSORLP00000001950	ENSORLG00000001573	8	3092233	3101212	-1	ENSDARP00000071587	ENSDARG00000054849	3	30103009	30111300	-1
ENSORLP00000001963	ENSORLG00000001583	8	3099516	3103134	-1	ENSDARP00000071579	ENSDARG00000054842	3	30121468	30128462	-1
ENSORLP00000001987	ENSORLG00000001604	8	3145418	3145852	1	ENSDARP00000098656	ENSDARG00000078049	3	30189744	30190774	1
ENSORLP00000002047	ENSORLG00000001644	8	3149380	3173433	-1	ENSDARP00000127938	ENSDARG00000077053	3	30198804	30269975	-1
ENSORLP00000002161	ENSORLG00000001739	8	3187000	3193245	-1	ENSDARP00000071557	ENSDARG00000054833	3	30292446	30303955	-1
ENSORLP00000002198	ENSORLG00000001767	8	3193686	3194884	-1	ENSDARP00000094278	ENSDARG00000019741	3	30305485	30309514	-1
ENSORLP00000002272	ENSORLG00000001823	8	3200337	3205631	-1	ENSDARP00000020784	ENSDARG00000005927	3	30318556	30337390	-1
ENSORLP00000002281	ENSORLG00000001832	8	3208484	3212226	1	ENSDARP00000128295	ENSDARG00000074667	3	30345875	30350787	1
ENSORLP00000002295	ENSORLG00000001842	8	3229575	3234389	-1	ENSDARP00000071497	ENSDARG00000054793	3	30392556	30399370	-1
ENSORLP00000002370	ENSORLG00000001903	8	3347562	3357506	-1	ENSDARP00000126055	ENSDARG00000004597	3	30523829	30535472	-1
ENSORLP00000002396	ENSORLG00000001922	8	3390538	3406783	-1	ENSDARP00000055392	ENSDARG00000038005	3	30605866	30638564	-1
ENSORLP00000002410	ENSORLG00000001935	8	3418806	3435150	-1	ENSDARP00000125697	ENSDARG00000075830	3	30668150	30760778	-1
ENSORLP00000002437	ENSORLG00000001960	8	3498136	3504923	-1	ENSDARP00000107150	ENSDARG00000054645	3	30817116	30829821	-1
ENSORLP00000002476	ENSORLG00000001986	8	3524401	3572588	-1	ENSDARP00000079762	ENSDARG00000060539	3	30851394	30921351	-1
ENSORLP00000002486	ENSORLG00000001997	8	3618795	3621147	-1	ENSDARP00000106837	ENSDARG00000075461	3	31019563	31032224	-1
ENSORLP00000002503	ENSORLG00000002008	8	3631208	3639506	-1	ENSDARP00000002360	ENSDARG00000003486	3	31042337	31060150	-1
ENSORLP00000002511	ENSORLG00000002013	8	3646514	3647238	1	ENSDARP00000071321	ENSDARG00000054616	3	31074067	31076546	1
ENSORLP00000002552	ENSORLG00000002046	8	3648065	3652336	-1	ENSDARP00000071301	ENSDARG00000054610	3	31077739	31089083	-1
ENSORLP00000002602	ENSORLG00000002089	8	3738920	3739532	1	ENSDARP00000113555	ENSDARG00000054588	3	31192459	31193106	1
ENSORLP00000002620	ENSORLG00000002104	8	3741943	3748180	-1	ENSDARP00000127109	ENSDARG00000078083	3	31195382	31208743	-1
ENSORLP00000002626	ENSORLG00000002110	8	3751548	3753135	-1	ENSDARP00000119872	ENSDARG00000097740	3	31214393	31218046	-1
ENSORLP00000002637	ENSORLG00000002120	8	3754682	3759133	-1	ENSDARP00000114273	ENSDARG00000037980	3	31221712	31230286	-1
Chain ID: 8	Score: 20.75	Medaka: chr6:12,602,816-13,830,229 (1.23 Mb)	Zebrafish: chr18:23,030,230-26,922,239 (3.89 Mb)
ENSORLP00000009948	ENSORLG00000007932	6	12602816	12608622	1	ENSDARP00000115356	ENSDARG00000039378	18	26912805	26922239	-1
ENSORLP00000009991	ENSORLG00000007964	6	12615824	12618662	-1	ENSDARP00000110074	ENSDARG00000034753	18	26843784	26863883	1
ENSORLP00000010000	ENSORLG00000007972	6	12621434	12622279	-1	ENSDARP00000089118	ENSDARG00000068138	18	26840363	26841193	1
ENSORLP00000010012	ENSORLG00000007981	6	12626483	12631479	1	ENSDARP00000089121	ENSDARG00000068140	18	26808015	26838996	-1
ENSORLP00000010022	ENSORLG00000007987	6	12633987	12636059	1	ENSDARP00000057552	ENSDARG00000039381	18	26798388	26799236	-1
ENSORLP00000010108	ENSORLG00000008059	6	12663691	12675531	-1	ENSDARP00000097719	ENSDARG00000078989	18	26664806	26695910	1
ENSORLP00000010167	ENSORLG00000008097	6	12713793	12730416	1	ENSDARP00000100646	ENSDARG00000075942	18	26402611	26454918	-1
ENSORLP00000010178	ENSORLG00000008110	6	12735440	12739998	-1	ENSDARP00000098087	ENSDARG00000077089	18	26215848	26395845	1
ENSORLP00000010235	ENSORLG00000008149	6	12761054	12788713	-1	ENSDARP00000103571	ENSDARG00000073824	18	26124733	26205095	1
ENSORLP00000010248	ENSORLG00000008160	6	12837619	12839199	1	ENSDARP00000120378	ENSDARG00000093286	18	25910471	25912060	-1
ENSORLP00000010322	ENSORLG00000008218	6	12852638	12862404	1	ENSDARP00000027389	ENSDARG00000003795	18	25882910	25901281	-1
ENSORLP00000010332	ENSORLG00000008229	6	12864037	12867151	-1	ENSDARP00000024217	ENSDARG00000014680	18	25831861	25880211	1
ENSORLP00000010352	ENSORLG00000008247	6	12950299	12959326	1	ENSDARP00000116301	ENSDARG00000074414	18	25567141	25638958	-1
ENSORLP00000010372	ENSORLG00000008266	6	12974030	12979562	1	ENSDARP00000093820	ENSDARG00000074163	18	25538907	25555044	-1
ENSORLP00000010382	ENSORLG00000008276	6	12980172	13007980	-1	ENSDARP00000009132	ENSDARG00000001976	18	25437294	25529113	1
ENSORLP00000010429	ENSORLG00000008312	6	13011124	13031736	1	ENSDARP00000090285	ENSDARG00000038121	18	25346987	25429375	-1
ENSORLP00000010448	ENSORLG00000008325	6	13035173	13037054	-1	ENSDARP00000080259	ENSDARG00000060707	18	25329922	25334655	1
ENSORLP00000010469	ENSORLG00000008337	6	13116630	13117640	-1	ENSDARP00000055562	ENSDARG00000038112	18	25009219	25010399	1
ENSORLP00000010494	ENSORLG00000008355	6	13137868	13161436	1	ENSDARP00000020823	ENSDARG00000018726	18	24857679	24960564	-1
ENSORLP00000010509	ENSORLG00000008368	6	13209297	13216885	1	ENSDARP00000022709	ENSDARG00000018788	18	24811756	24834932	-1
ENSORLP00000010555	ENSORLG00000008403	6	13238854	13249346	1	ENSDARP00000108411	ENSDARG00000060687	18	24718756	24772356	-1
ENSORLP00000010565	ENSORLG00000008413	6	13253996	13259962	-1	ENSDARP00000027966	ENSDARG00000012248	18	24703743	24713173	1
ENSORLP00000010570	ENSORLG00000008420	6	13363576	13364000	-1	ENSDARP00000090237	ENSDARG00000068702	18	24347389	24355624	1
ENSORLP00000010585	ENSORLG00000008429	6	13566630	13573919	1	ENSDARP00000059975	ENSDARG00000040926	18	23654591	23658742	-1
ENSORLP00000010626	ENSORLG00000008458	6	13752041	13777429	-1	ENSDARP00000001617	ENSDARG00000001414	18	23154438	23236812	1
ENSORLP00000010661	ENSORLG00000008489	6	13788320	13830229	-1	ENSDARP00000110624	ENSDARG00000031756	18	23030230	23136519	1
Chain ID: 9	Score: 20.75	Medaka: chr8:8,612,190-9,241,672 (0.63 Mb)	Zebrafish: chr3:53,102,616-55,469,588 (2.37 Mb)
ENSORLP00000006996	ENSORLG00000005560	8	8612190	8613256	1	ENSDARP00000053105	ENSDARG00000036548	3	55468476	55469588	-1
ENSORLP00000007019	ENSORLG00000005582	8	8618103	8627478	1	ENSDARP00000013243	ENSDARG00000030756	3	55443175	55458730	-1
ENSORLP00000007040	ENSORLG00000005601	8	8629617	8632311	-1	ENSDARP00000027672	ENSDARG00000016889	3	55433764	55441406	1
ENSORLP00000007045	ENSORLG00000005606	8	8633145	8634172	-1	ENSDARP00000127948	ENSDARG00000014929	3	55424397	55429454	1
ENSORLP00000007082	ENSORLG00000005634	8	8635758	8639624	-1	ENSDARP00000038241	ENSDARG00000022232	3	55405741	55419468	1
ENSORLP00000007102	ENSORLG00000005649	8	8641463	8645410	1	ENSDARP00000022066	ENSDARG00000020265	3	55376412	55396284	-1
ENSORLP00000007242	ENSORLG00000005760	8	8653021	8668967	1	ENSDARP00000105597	ENSDARG00000005679	3	55286830	55351555	-1
ENSORLP00000007282	ENSORLG00000005795	8	8708050	8729346	-1	ENSDARP00000104138	ENSDARG00000077847	3	55019626	55088699	1
ENSORLP00000007335	ENSORLG00000005829	8	8772260	8805370	-1	ENSDARP00000013036	ENSDARG00000017360	3	54697355	54769855	1
ENSORLP00000007365	ENSORLG00000005853	8	8821793	8831940	1	ENSDARP00000032715	ENSDARG00000028048	3	54326220	54359982	-1
ENSORLP00000007525	ENSORLG00000005980	8	8861165	8884755	1	ENSDARP00000068420	ENSDARG00000052139	3	54168014	54197194	-1
ENSORLP00000007540	ENSORLG00000005996	8	8886703	8889031	-1	ENSDARP00000010414	ENSDARG00000016213	3	54149958	54160230	1
ENSORLP00000007553	ENSORLG00000006007	8	8892573	8895133	1	ENSDARP00000098458	ENSDARG00000075015	3	54114461	54123253	-1
ENSORLP00000007568	ENSORLG00000006019	8	8895900	8898103	1	ENSDARP00000105488	ENSDARG00000039116	3	54095556	54103147	-1
ENSORLP00000007590	ENSORLG00000006040	8	8900460	8918723	-1	ENSDARP00000077150	ENSDARG00000059475	3	53990779	54087459	1
ENSORLP00000007640	ENSORLG00000006076	8	8920530	8928684	-1	ENSDARP00000010070	ENSDARG00000007092	3	53955166	53988326	1
ENSORLP00000008116	ENSORLG00000006461	8	9076815	9084723	-1	ENSDARP00000029601	ENSDARG00000007603	3	53878602	53911584	1
ENSORLP00000008156	ENSORLG00000006496	8	9112912	9114789	1	ENSDARP00000062080	ENSDARG00000042338	3	53721301	53729781	-1
ENSORLP00000008193	ENSORLG00000006532	8	9151762	9153672	-1	ENSDARP00000104986	ENSDARG00000089922	3	53592461	53618071	1
ENSORLP00000008241	ENSORLG00000006566	8	9155126	9165030	-1	ENSDARP00000058957	ENSDARG00000029931	3	53537766	53589637	1
ENSORLP00000008271	ENSORLG00000006590	8	9168708	9180144	-1	ENSDARP00000089596	ENSDARG00000077915	3	53506261	53521409	1
ENSORLP00000008322	ENSORLG00000006626	8	9197140	9205335	-1	ENSDARP00000102260	ENSDARG00000073974	3	53340906	53369684	1
ENSORLP00000008333	ENSORLG00000006638	8	9206402	9208007	-1	ENSDARP00000113038	ENSDARG00000021233	3	53327443	53337528	1
ENSORLP00000008360	ENSORLG00000006660	8	9223009	9225584	1	ENSDARP00000055944	ENSDARG00000003970	3	53245203	53252874	-1
ENSORLP00000008407	ENSORLG00000006698	8	9226605	9230440	-1	ENSDARP00000006540	ENSDARG00000006240	3	53183422	53240984	1
ENSORLP00000008420	ENSORLG00000006707	8	9231031	9234019	-1	ENSDARP00000102874	ENSDARG00000078602	3	53166688	53177541	1
ENSORLP00000008434	ENSORLG00000006720	8	9237372	9241672	-1	ENSDARP00000036302	ENSDARG00000026313	3	53102616	53128052	1
Chain ID: 10	Score: 20.25	Medaka: chr5:16,171,613-17,003,657 (0.83 Mb)	Zebrafish: chr21:9,959,494-11,324,630 (1.37 Mb)
ENSORLP00000010674	ENSORLG00000008500	5	16171613	16174328	1	ENSDARP00000076041	ENSDARG00000058682	21	9959494	9967272	1
ENSORLP00000010686	ENSORLG00000008514	5	16180203	16181729	1	ENSDARP00000065841	ENSDARG00000044797	21	9984228	9986804	1
ENSORLP00000010703	ENSORLG00000008522	5	16183455	16190600	-1	ENSDARP00000114134	ENSDARG00000058693	21	9992478	10078431	-1
ENSORLP00000010803	ENSORLG00000008605	5	16221349	16230683	1	ENSDARP00000004083	ENSDARG00000002600	21	10109018	10146283	1
ENSORLP00000010842	ENSORLG00000008642	5	16247400	16262884	1	ENSDARP00000093185	ENSDARG00000006251	21	10173170	10196754	1
ENSORLP00000010851	ENSORLG00000008650	5	16266212	16272782	1	ENSDARP00000120838	ENSDARG00000028106	21	10200405	10203976	1
ENSORLP00000010874	ENSORLG00000008666	5	16274304	16297714	-1	ENSDARP00000109526	ENSDARG00000090036	21	10205559	10243970	-1
ENSORLP00000010885	ENSORLG00000008675	5	16302017	16303638	-1	ENSDARP00000076093	ENSDARG00000058725	21	10254213	10256989	-1
ENSORLP00000010888	ENSORLG00000008680	5	16309329	16309851	1	ENSDARP00000076102	ENSDARG00000058728	21	10259540	10263369	1
ENSORLP00000010909	ENSORLG00000008694	5	16315154	16323139	-1	ENSDARP00000126174	ENSDARG00000058740	21	10269637	10277795	-1
ENSORLP00000010936	ENSORLG00000008711	5	16325657	16328000	1	ENSDARP00000076116	ENSDARG00000058746	21	10291709	10305071	1
ENSORLP00000010981	ENSORLG00000008742	5	16334798	16341984	1	ENSDARP00000086448	ENSDARG00000063155	21	10309757	10335681	1
ENSORLP00000011045	ENSORLG00000008796	5	16345470	16356639	1	ENSDARP00000120498	ENSDARG00000088318	21	10347755	10378703	1
ENSORLP00000011089	ENSORLG00000008833	5	16358835	16363306	-1	ENSDARP00000099474	ENSDARG00000012820	21	10383092	10394141	-1
ENSORLP00000011110	ENSORLG00000008854	5	16368567	16379114	-1	ENSDARP00000115544	ENSDARG00000011371	21	10409318	10420370	-1
ENSORLP00000011130	ENSORLG00000008872	5	16382880	16388416	1	ENSDARP00000105936	ENSDARG00000026787	21	10434514	10444152	1
ENSORLP00000011157	ENSORLG00000008894	5	16389914	16393470	-1	ENSDARP00000030536	ENSDARG00000011926	21	10447931	10460030	-1
ENSORLP00000011184	ENSORLG00000008913	5	16420429	16523703	-1	ENSDARP00000122295	ENSDARG00000070045	21	10510147	10543720	-1
ENSORLP00000011201	ENSORLG00000008931	5	16974440	16976612	-1	ENSDARP00000099783	ENSDARG00000074894	21	11250961	11253260	-1
ENSORLP00000011231	ENSORLG00000008956	5	16982340	16987390	-1	ENSDARP00000044503	ENSDARG00000012126	21	11268540	11286889	-1
ENSORLP00000011252	ENSORLG00000008972	5	16990281	17003657	-1	ENSDARP00000002156	ENSDARG00000016396	21	11295323	11324630	-1
Chain ID: 11	Score: 20.25	Medaka: chr7:10,658,622-11,350,114 (0.69 Mb)	Zebrafish: chr8:24,578,928-26,210,055 (1.63 Mb)
ENSORLP00000007304	ENSORLG00000005809	7	10658622	10661212	-1	ENSDARP00000033750	ENSDARG00000023861	8	26205233	26210055	1
ENSORLP00000007321	ENSORLG00000005820	7	10663626	10667121	-1	ENSDARP00000109055	ENSDARG00000086708	8	26195160	26202205	1
ENSORLP00000007331	ENSORLG00000005828	7	10668966	10674358	1	ENSDARP00000122284	ENSDARG00000011553	8	26183460	26189035	-1
ENSORLP00000007396	ENSORLG00000005876	7	10676540	10682553	1	ENSDARP00000114441	ENSDARG00000005704	8	26164153	26180728	-1
ENSORLP00000007529	ENSORLG00000005987	7	10704333	10711784	-1	ENSDARP00000087522	ENSDARG00000029952	8	26120744	26144386	1
ENSORLP00000007558	ENSORLG00000006010	7	10736643	10740020	1	ENSDARP00000062362	ENSDARG00000042529	8	26079612	26088362	-1
ENSORLP00000007582	ENSORLG00000006031	7	10747076	10763498	-1	ENSDARP00000047527	ENSDARG00000030644	8	26043424	26073262	1
ENSORLP00000007587	ENSORLG00000006038	7	10769577	10771107	-1	ENSDARP00000114759	ENSDARG00000055570	8	26029353	26030710	1
ENSORLP00000007593	ENSORLG00000006044	7	10797987	10802074	-1	ENSDARP00000001793	ENSDARG00000000690	8	25932759	25942235	1
ENSORLP00000007606	ENSORLG00000006051	7	10815168	10819094	1	ENSDARP00000119088	ENSDARG00000056252	8	25896631	25927167	-1
ENSORLP00000007611	ENSORLG00000006055	7	10824503	10825620	-1	ENSDARP00000112143	ENSDARG00000061314	8	25889290	25893111	1
ENSORLP00000007708	ENSORLG00000006132	7	10856298	10858217	1	ENSDARP00000004394	ENSDARG00000056210	8	25821041	25822966	-1
ENSORLP00000007743	ENSORLG00000006154	7	10860933	10876700	1	ENSDARP00000081727	ENSDARG00000061288	8	25781575	25818251	-1
ENSORLP00000007786	ENSORLG00000006191	7	10943634	10944605	1	ENSDARP00000107941	ENSDARG00000091086	8	25652631	25660880	-1
ENSORLP00000007792	ENSORLG00000006197	7	10948373	10951129	1	ENSDARP00000100758	ENSDARG00000073847	8	25641454	25644018	-1
ENSORLP00000007849	ENSORLG00000006243	7	10959255	10971382	-1	ENSDARP00000124983	ENSDARG00000042807	8	25600857	25631293	1
ENSORLP00000007862	ENSORLG00000006257	7	10984519	10987817	-1	ENSDARP00000106008	ENSDARG00000090194	8	25593118	25596551	1
ENSORLP00000007904	ENSORLG00000006291	7	11000434	11020754	-1	ENSDARP00000104222	ENSDARG00000076920	8	25152277	25178298	1
ENSORLP00000007967	ENSORLG00000006340	7	11026007	11112403	-1	ENSDARP00000062844	ENSDARG00000042816	8	25134557	25148250	1
ENSORLP00000007985	ENSORLG00000006355	7	11095734	11099560	1	ENSDARP00000090466	ENSDARG00000068833	8	24961730	24965983	-1
ENSORLP00000008005	ENSORLG00000006371	7	11125665	11204411	-1	ENSDARP00000082090	ENSDARG00000061466	8	24798557	24929787	1
ENSORLP00000008018	ENSORLG00000006380	7	11241708	11243343	1	ENSDARP00000116649	ENSDARG00000056458	8	24734885	24737157	-1
ENSORLP00000008093	ENSORLG00000006445	7	11244898	11257963	-1	ENSDARP00000032398	ENSDARG00000073997	8	24714444	24731669	1
ENSORLP00000008212	ENSORLG00000006540	7	11277810	11289604	-1	ENSDARP00000062967	ENSDARG00000042899	8	24642844	24661691	1
ENSORLP00000008257	ENSORLG00000006578	7	11319739	11321862	1	ENSDARP00000116316	ENSDARG00000078917	8	24629886	24633261	-1
ENSORLP00000008265	ENSORLG00000006585	7	11327106	11331109	1	ENSDARP00000103134	ENSDARG00000078155	8	24606841	24618124	-1
ENSORLP00000008283	ENSORLG00000006600	7	11336856	11339494	-1	ENSDARP00000062982	ENSDARG00000042905	8	24591108	24595876	1
ENSORLP00000008293	ENSORLG00000006609	7	11341886	11345462	-1	ENSDARP00000090524	ENSDARG00000068870	8	24584545	24590108	1
ENSORLP00000008302	ENSORLG00000006615	7	11348244	11350114	-1	ENSDARP00000095121	ENSDARG00000028295	8	24578928	24583533	1
Chain ID: 12	Score: 20.00	Medaka: chr15:20,679,565-21,282,167 (0.60 Mb)	Zebrafish: chr13:29,462,452-30,869,328 (1.41 Mb)
ENSORLP00000008384	ENSORLG00000006680	15	20679565	20712507	1	ENSDARP00000103116	ENSDARG00000078026	13	30807967	30869328	-1
ENSORLP00000008393	ENSORLG00000006690	15	20718703	20719857	-1	ENSDARP00000003709	ENSDARG00000007409	13	30795894	30799059	1
ENSORLP00000008437	ENSORLG00000006719	15	20724993	20751916	-1	ENSDARP00000097747	ENSDARG00000074502	13	30721910	30791752	1
ENSORLP00000008459	ENSORLG00000006739	15	20855487	20857656	-1	ENSDARP00000091586	ENSDARG00000039347	13	30451734	30457432	1
ENSORLP00000008496	ENSORLG00000006765	15	20866980	20872360	1	ENSDARP00000040408	ENSDARG00000030441	13	30376116	30385128	-1
ENSORLP00000008519	ENSORLG00000006779	15	20874369	20876146	1	ENSDARP00000041514	ENSDARG00000033320	13	30369475	30373361	-1
ENSORLP00000008523	ENSORLG00000006784	15	20878187	20880121	1	ENSDARP00000111165	ENSDARG00000074895	13	30346155	30365463	-1
ENSORLP00000008530	ENSORLG00000006790	15	20888097	20911059	-1	ENSDARP00000100863	ENSDARG00000075393	13	30278814	30355052	1
ENSORLP00000008561	ENSORLG00000006815	15	20920101	20924582	-1	ENSDARP00000057524	ENSDARG00000039363	13	30259064	30267036	1
ENSORLP00000008570	ENSORLG00000006824	15	20924876	20927519	1	ENSDARP00000112957	ENSDARG00000033967	13	30256712	30258154	-1
ENSORLP00000008592	ENSORLG00000006839	15	20935753	20943038	1	ENSDARP00000044008	ENSDARG00000030265	13	30234044	30250873	-1
ENSORLP00000008607	ENSORLG00000006850	15	20948867	20953537	1	ENSDARP00000049623	ENSDARG00000006911	13	30217255	30229833	-1
ENSORLP00000008626	ENSORLG00000006864	15	20960560	20965804	1	ENSDARP00000042048	ENSDARG00000031915	13	30177160	30203617	-1
ENSORLP00000008633	ENSORLG00000006871	15	20969592	20972011	-1	ENSDARP00000057527	ENSDARG00000039365	13	30149824	30158959	1
ENSORLP00000008639	ENSORLG00000006876	15	21145516	21148833	-1	ENSDARP00000127739	ENSDARG00000061070	13	29743116	29744612	1
ENSORLP00000008660	ENSORLG00000006893	15	21160303	21172599	1	ENSDARP00000101442	ENSDARG00000004643	13	29705460	29729120	-1
ENSORLP00000008666	ENSORLG00000006899	15	21177042	21181430	-1	ENSDARP00000036969	ENSDARG00000030626	13	29694089	29697521	1
ENSORLP00000008677	ENSORLG00000006907	15	21183983	21187570	-1	ENSDARP00000114768	ENSDARG00000019179	13	29686151	29689965	1
ENSORLP00000008699	ENSORLG00000006925	15	21191229	21195710	1	ENSDARP00000071634	ENSDARG00000054890	13	29669847	29679171	-1
ENSORLP00000008722	ENSORLG00000006943	15	21207487	21212667	1	ENSDARP00000125038	ENSDARG00000015854	13	29632961	29644423	-1
ENSORLP00000008738	ENSORLG00000006956	15	21231435	21260120	-1	ENSDARP00000102096	ENSDARG00000061114	13	29517063	29570568	1
ENSORLP00000008900	ENSORLG00000007086	15	21262888	21282167	-1	ENSDARP00000005170	ENSDARG00000017128	13	29462452	29512504	1
Chain ID: 13	Score: 18.50	Medaka: chr12:13,346,419-13,711,375 (0.36 Mb)	Zebrafish: chr10:42,202,487-43,472,991 (1.27 Mb)
ENSORLP00000010529	ENSORLG00000008382	12	13346419	13349321	1	ENSDARP00000116212	ENSDARG00000060922	10	43455221	43472991	-1
ENSORLP00000010553	ENSORLG00000008402	12	13351379	13361490	1	ENSDARP00000063070	ENSDARG00000042962	10	43413531	43452125	-1
ENSORLP00000010594	ENSORLG00000008435	12	13379249	13390664	-1	ENSDARP00000080600	ENSDARG00000060847	10	43351974	43385211	1
ENSORLP00000010639	ENSORLG00000008472	12	13399253	13406932	-1	ENSDARP00000106726	ENSDARG00000042929	10	43305110	43324351	1
ENSORLP00000010663	ENSORLG00000008491	12	13408999	13410486	-1	ENSDARP00000022726	ENSDARG00000004154	10	43279349	43286052	1
ENSORLP00000010748	ENSORLG00000008562	12	13410623	13431559	1	ENSDARP00000093306	ENSDARG00000046010	10	43195234	43202257	-1
ENSORLP00000010781	ENSORLG00000008588	12	13434973	13448037	-1	ENSDARP00000112116	ENSDARG00000054036	10	43130865	43181916	1
ENSORLP00000010792	ENSORLG00000008600	12	13476114	13506143	-1	ENSDARP00000111990	ENSDARG00000091128	10	43033551	43100332	1
ENSORLP00000010855	ENSORLG00000008649	12	13510798	13518487	1	ENSDARP00000125027	ENSDARG00000018342	10	42990022	43023146	-1
ENSORLP00000010906	ENSORLG00000008689	12	13523739	13535218	-1	ENSDARP00000100117	ENSDARG00000078258	10	42915034	42969590	1
ENSORLP00000011075	ENSORLG00000008823	12	13571377	13575321	1	ENSDARP00000106456	ENSDARG00000033411	10	42774416	42814775	-1
ENSORLP00000011088	ENSORLG00000008835	12	13579250	13589240	1	ENSDARP00000022427	ENSDARG00000019897	10	42727446	42762065	-1
ENSORLP00000011093	ENSORLG00000008840	12	13590415	13597803	1	ENSDARP00000052970	ENSDARG00000036462	10	42681454	42717143	-1
ENSORLP00000011116	ENSORLG00000008859	12	13605183	13613251	1	ENSDARP00000006590	ENSDARG00000002060	10	42654542	42665430	-1
ENSORLP00000011124	ENSORLG00000008867	12	13617666	13622131	-1	ENSDARP00000126515	ENSDARG00000036458	10	42627246	42635288	1
ENSORLP00000011061	ENSORLG00000008809	12	13634778	13656571	-1	ENSDARP00000117628	ENSDARG00000036456	10	42544757	42567389	1
ENSORLP00000011154	ENSORLG00000008890	12	13648895	13660209	1	ENSDARP00000058621	ENSDARG00000077686	10	42446546	42531064	-1
ENSORLP00000011198	ENSORLG00000008926	12	13671604	13683471	-1	ENSDARP00000101200	ENSDARG00000074075	10	42340049	42412501	1
ENSORLP00000011251	ENSORLG00000008971	12	13691440	13706540	1	ENSDARP00000059794	ENSDARG00000028053	10	42226043	42305227	-1
ENSORLP00000011286	ENSORLG00000009000	12	13708751	13711375	-1	ENSDARP00000080227	ENSDARG00000060688	10	42202487	42217782	1
Chain ID: 14	Score: 17.50	Medaka: chr6:11,029,556-11,603,351 (0.57 Mb)	Zebrafish: chr18:18,713,472-20,312,938 (1.60 Mb)
ENSORLP00000008235	ENSORLG00000006561	6	11029556	11035826	1	ENSDARP00000060290	ENSDARG00000069274	18	20297582	20312938	-1
ENSORLP00000008330	ENSORLG00000006635	6	11042180	11045736	-1	ENSDARP00000060294	ENSDARG00000041133	18	20275196	20291660	1
ENSORLP00000008345	ENSORLG00000006648	6	11048354	11050534	-1	ENSDARP00000106329	ENSDARG00000069271	18	20263622	20270019	1
ENSORLP00000008354	ENSORLG00000006657	6	11052661	11058237	-1	ENSDARP00000091438	ENSDARG00000041140	18	20249136	20259897	1
ENSORLP00000008396	ENSORLG00000006689	6	11059584	11069902	1	ENSDARP00000026695	ENSDARG00000014943	18	20217485	20239018	-1
ENSORLP00000008411	ENSORLG00000006700	6	11142426	11159218	-1	ENSDARP00000045678	ENSDARG00000002787	18	20007554	20036870	1
ENSORLP00000008446	ENSORLG00000006728	6	11213016	11221127	-1	ENSDARP00000128322	ENSDARG00000062445	18	19787273	19805840	1
ENSORLP00000008453	ENSORLG00000006736	6	11222534	11227315	-1	ENSDARP00000122471	ENSDARG00000062448	18	19756498	19762220	1
ENSORLP00000008461	ENSORLG00000006741	6	11265158	11266789	-1	ENSDARP00000091379	ENSDARG00000069240	18	19664036	19664592	1
ENSORLP00000008476	ENSORLG00000006754	6	11292123	11294467	1	ENSDARP00000060343	ENSDARG00000041170	18	19593802	19600410	-1
ENSORLP00000008572	ENSORLG00000006825	6	11323968	11349246	-1	ENSDARP00000091342	ENSDARG00000031763	18	19429638	19479772	1
ENSORLP00000008593	ENSORLG00000006840	6	11409657	11413567	1	ENSDARP00000110875	ENSDARG00000016337	18	19248922	19264154	-1
ENSORLP00000008625	ENSORLG00000006863	6	11414063	11418055	-1	ENSDARP00000074147	ENSDARG00000057100	18	19237426	19247973	1
ENSORLP00000008645	ENSORLG00000006882	6	11417749	11421605	1	ENSDARP00000060362	ENSDARG00000041182	18	19231942	19236847	-1
ENSORLP00000008701	ENSORLG00000006926	6	11421912	11428059	-1	ENSDARP00000008018	ENSDARG00000007825	18	19200132	19231272	1
ENSORLP00000008790	ENSORLG00000006997	6	11457475	11513265	1	ENSDARP00000085288	ENSDARG00000062686	18	18924148	19131503	-1
ENSORLP00000008826	ENSORLG00000007022	6	11529028	11548378	1	ENSDARP00000108460	ENSDARG00000062721	18	18825837	18875852	-1
ENSORLP00000008861	ENSORLG00000007056	6	11571318	11576861	1	ENSDARP00000060730	ENSDARG00000041429	18	18776314	18784958	-1
ENSORLP00000008885	ENSORLG00000007078	6	11576557	11580734	-1	ENSDARP00000016888	ENSDARG00000016038	18	18762927	18775519	1
ENSORLP00000008899	ENSORLG00000007090	6	11581015	11586865	1	ENSDARP00000119003	ENSDARG00000033020	18	18757316	18760107	-1
ENSORLP00000008903	ENSORLG00000007094	6	11597486	11603351	1	ENSDARP00000091231	ENSDARG00000069168	18	18713472	18722685	-1
Chain ID: 15	Score: 16.75	Medaka: chr24:13,627,894-13,952,046 (0.32 Mb)	Zebrafish: chr20:18,819,440-19,660,936 (0.84 Mb)
ENSORLP00000020364	ENSORLG00000016269	24	13627894	13628043	1	ENSDARP00000126907	ENSDARG00000089549	20	19652718	19660936	-1
ENSORLP00000020366	ENSORLG00000016272	24	13630759	13633495	-1	ENSDARP00000094574	ENSDARG00000016138	20	19634940	19647500	1
ENSORLP00000020383	ENSORLG00000016283	24	13645999	13650631	1	ENSDARP00000005720	ENSDARG00000014004	20	19589308	19604688	-1
ENSORLP00000020386	ENSORLG00000016287	24	13651652	13653289	-1	ENSDARP00000063695	ENSDARG00000043388	20	19584931	19588010	1
ENSORLP00000020418	ENSORLG00000016311	24	13654561	13673772	1	ENSDARP00000040190	ENSDARG00000091418	20	19510525	19583081	-1
ENSORLP00000020421	ENSORLG00000016316	24	13677255	13683464	-1	ENSDARP00000126626	ENSDARG00000019961	20	19496614	19503532	1
ENSORLP00000020431	ENSORLG00000016319	24	13692978	13703216	1	ENSDARP00000121043	ENSDARG00000020284	20	19447036	19487458	-1
ENSORLP00000020436	ENSORLG00000016324	24	13706633	13730306	1	ENSDARP00000063702	ENSDARG00000043394	20	19353207	19437811	-1
ENSORLP00000020451	ENSORLG00000016334	24	13747664	13758574	-1	ENSDARP00000063705	ENSDARG00000043396	20	19285726	19344032	1
ENSORLP00000020477	ENSORLG00000016355	24	13780072	13785254	-1	ENSDARP00000120039	ENSDARG00000007783	20	19250477	19268058	1
ENSORLP00000020489	ENSORLG00000016365	24	13825054	13827038	-1	ENSDARP00000108471	ENSDARG00000030125	20	19147468	19149714	1
ENSORLP00000020504	ENSORLG00000016376	24	13830898	13855985	-1	ENSDARP00000104805	ENSDARG00000023532	20	19078878	19130669	1
ENSORLP00000020513	ENSORLG00000016384	24	13859333	13863605	-1	ENSDARP00000114681	ENSDARG00000002745	20	19066800	19069308	1
ENSORLP00000020533	ENSORLG00000016398	24	13869784	13874932	-1	ENSDARP00000126910	ENSDARG00000015860	20	19019503	19055778	1
ENSORLP00000020541	ENSORLG00000016409	24	13882541	13930372	1	ENSDARP00000063724	ENSDARG00000043410	20	18874460	18987483	-1
ENSORLP00000020563	ENSORLG00000016421	24	13941861	13945384	1	ENSDARP00000022543	ENSDARG00000013705	20	18848445	18866910	-1
ENSORLP00000020566	ENSORLG00000016424	24	13950931	13952046	-1	ENSDARP00000116823	ENSDARG00000023952	20	18819440	18827650	1
Chain ID: 16	Score: 16.50	Medaka: chr7:12,127,085-12,507,629 (0.38 Mb)	Zebrafish: chr23:27,882,245-28,664,258 (0.78 Mb)
ENSORLP00000009336	ENSORLG00000007449	7	12127085	12133619	1	ENSDARP00000016790	ENSDARG00000011549	23	28642205	28664258	-1
ENSORLP00000009353	ENSORLG00000007460	7	12137287	12143634	-1	ENSDARP00000120093	ENSDARG00000033738	23	28617517	28626139	1
ENSORLP00000009361	ENSORLG00000007467	7	12152276	12153463	1	ENSDARP00000122926	ENSDARG00000003469	23	28587568	28588614	-1
ENSORLP00000009367	ENSORLG00000007474	7	12160185	12161312	-1	ENSDARP00000121836	ENSDARG00000055655	23	28565957	28568654	1
ENSORLP00000009384	ENSORLG00000007485	7	12173292	12229791	1	ENSDARP00000114725	ENSDARG00000009899	23	28428775	28537145	-1
ENSORLP00000009392	ENSORLG00000007492	7	12257349	12258268	1	ENSDARP00000121994	ENSDARG00000093089	23	28382550	28383897	-1
ENSORLP00000009417	ENSORLG00000007511	7	12271869	12282550	1	ENSDARP00000082248	ENSDARG00000061520	23	28340588	28357575	-1
ENSORLP00000009426	ENSORLG00000007519	7	12286683	12291323	-1	ENSDARP00000100522	ENSDARG00000078800	23	28320845	28333777	1
ENSORLP00000009433	ENSORLG00000007526	7	12315428	12317000	1	ENSDARP00000023214	ENSDARG00000010124	23	28268067	28269941	-1
ENSORLP00000009450	ENSORLG00000007538	7	12377661	12379370	1	ENSDARP00000072494	ENSDARG00000055638	23	28103370	28111624	-1
ENSORLP00000009460	ENSORLG00000007548	7	12392852	12398510	1	ENSDARP00000123002	ENSDARG00000018179	23	28077013	28097652	-1
ENSORLP00000009504	ENSORLG00000007583	7	12421225	12444809	-1	ENSDARP00000053862	ENSDARG00000037060	23	28000605	28033828	1
ENSORLP00000009519	ENSORLG00000007595	7	12451504	12455129	-1	ENSDARP00000053870	ENSDARG00000037062	23	27981737	27989541	1
ENSORLP00000009552	ENSORLG00000007622	7	12460325	12473475	-1	ENSDARP00000019361	ENSDARG00000004745	23	27944654	27967524	1
ENSORLP00000009560	ENSORLG00000007630	7	12475439	12476636	1	ENSDARP00000127949	ENSDARG00000037067	23	27937272	27941998	-1
ENSORLP00000009566	ENSORLG00000007632	7	12480749	12485776	1	ENSDARP00000116091	ENSDARG00000037068	23	27923651	27933357	-1
ENSORLP00000009577	ENSORLG00000007641	7	12499856	12503002	-1	ENSDARP00000110057	ENSDARG00000055554	23	27892988	27898495	1
ENSORLP00000009589	ENSORLG00000007655	7	12505699	12507629	1	ENSDARP00000059973	ENSDARG00000040925	23	27882245	27888312	-1
Chain ID: 17	Score: 16.25	Medaka: chr21:23,015,654-23,805,665 (0.79 Mb)	Zebrafish: chr9:49,111,115-53,163,240 (4.05 Mb)
ENSORLP00000021013	ENSORLG00000016796	21	23015654	23019215	-1	ENSDARP00000109636	ENSDARG00000086100	9	53143334	53163240	1
ENSORLP00000021045	ENSORLG00000016818	21	23022501	23035374	-1	ENSDARP00000008860	ENSDARG00000057768	9	53077683	53126008	1
ENSORLP00000021053	ENSORLG00000016828	21	23070764	23074227	1	ENSDARP00000019930	ENSDARG00000004712	9	52778432	52782842	-1
ENSORLP00000021081	ENSORLG00000016849	21	23087173	23107378	1	ENSDARP00000079241	ENSDARG00000060303	9	52636193	52713526	-1
ENSORLP00000021120	ENSORLG00000016880	21	23115458	23131779	-1	ENSDARP00000098856	ENSDARG00000078468	9	52572051	52607177	1
ENSORLP00000021147	ENSORLG00000016902	21	23134212	23146389	-1	ENSDARP00000013943	ENSDARG00000018553	9	52494636	52563355	1
ENSORLP00000021168	ENSORLG00000016918	21	23242304	23244544	-1	ENSDARP00000006334	ENSDARG00000008662	9	52086541	52088751	1
ENSORLP00000021170	ENSORLG00000016920	21	23338835	23344553	-1	ENSDARP00000089458	ENSDARG00000068280	9	51399179	51498601	1
ENSORLP00000021172	ENSORLG00000016927	21	23367312	23368206	-1	ENSDARP00000110637	ENSDARG00000091816	9	51340732	51356181	1
ENSORLP00000021281	ENSORLG00000017010	21	23460233	23466632	1	ENSDARP00000087814	ENSDARG00000063724	9	50841607	50853337	-1
ENSORLP00000021292	ENSORLG00000017017	21	23518518	23521922	1	ENSDARP00000105380	ENSDARG00000091090	9	50511804	50527358	-1
ENSORLP00000021323	ENSORLG00000017040	21	23608737	23623419	1	ENSDARP00000070109	ENSDARG00000053583	9	49924582	49984776	-1
ENSORLP00000021340	ENSORLG00000017055	21	23628316	23633637	1	ENSDARP00000098854	ENSDARG00000077866	9	49883809	49912242	-1
ENSORLP00000021342	ENSORLG00000017057	21	23634339	23637362	-1	ENSDARP00000104418	ENSDARG00000078433	9	49868956	49878443	1
ENSORLP00000021376	ENSORLG00000017088	21	23659189	23661588	1	ENSDARP00000027139	ENSDARG00000019260	9	49753453	49768652	-1
ENSORLP00000021387	ENSORLG00000017092	21	23663899	23667075	1	ENSDARP00000003828	ENSDARG00000017882	9	49727624	49748076	-1
ENSORLP00000021438	ENSORLG00000017126	21	23668030	23719343	-1	ENSDARP00000108215	ENSDARG00000060649	9	49443800	49716292	1
ENSORLP00000021440	ENSORLG00000017136	21	23724468	23726981	1	ENSDARP00000058247	ENSDARG00000039824	9	49374591	49394860	-1
ENSORLP00000021450	ENSORLG00000017145	21	23731616	23746863	1	ENSDARP00000100078	ENSDARG00000076321	9	49286093	49353261	-1
ENSORLP00000021453	ENSORLG00000017147	21	23748740	23752398	1	ENSDARP00000058254	ENSDARG00000039827	9	49272458	49283858	-1
ENSORLP00000021457	ENSORLG00000017151	21	23753176	23755624	1	ENSDARP00000090560	ENSDARG00000068888	9	49258427	49269476	-1
ENSORLP00000021470	ENSORLG00000017160	21	23756688	23762534	-1	ENSDARP00000118274	ENSDARG00000056128	9	49227222	49253696	1
ENSORLP00000021488	ENSORLG00000017175	21	23772013	23773991	-1	ENSDARP00000102848	ENSDARG00000077928	9	49206845	49218483	1
ENSORLP00000021510	ENSORLG00000017192	21	23777982	23783580	1	ENSDARP00000020860	ENSDARG00000001873	9	49174195	49201688	-1
ENSORLP00000021544	ENSORLG00000017218	21	23803045	23805665	-1	ENSDARP00000090567	ENSDARG00000068893	9	49111115	49119012	1
Chain ID: 18	Score: 16.25	Medaka: chr5:28,502,651-29,265,589 (0.76 Mb)	Zebrafish: chr11:21,859,892-23,850,329 (1.99 Mb)
ENSORLP00000019665	ENSORLG00000015703	5	28502651	28504802	-1	ENSDARP00000065984	ENSDARG00000044895	11	21859892	21863262	-1
ENSORLP00000019683	ENSORLG00000015717	5	28531989	28552678	1	ENSDARP00000065983	ENSDARG00000044894	11	21886632	21894477	1
ENSORLP00000019685	ENSORLG00000015719	5	28561087	28562003	1	ENSDARP00000111843	ENSDARG00000090344	11	21929540	21932934	1
ENSORLP00000019691	ENSORLG00000015724	5	28576935	28579021	1	ENSDARP00000098423	ENSDARG00000078147	11	21971239	21972682	1
ENSORLP00000019719	ENSORLG00000015745	5	28587107	28615991	-1	ENSDARP00000020470	ENSDARG00000002552	11	21989589	22050922	-1
ENSORLP00000019731	ENSORLG00000015754	5	28637742	28643433	-1	ENSDARP00000106736	ENSDARG00000070600	11	22094959	22099967	-1
ENSORLP00000019742	ENSORLG00000015763	5	28648286	28656861	-1	ENSDARP00000074501	ENSDARG00000070601	11	22116265	22196884	-1
ENSORLP00000019746	ENSORLG00000015769	5	28682718	28693157	-1	ENSDARP00000106309	ENSDARG00000070606	11	22199872	22230137	-1
ENSORLP00000019785	ENSORLG00000015797	5	28699987	28767253	-1	ENSDARP00000045390	ENSDARG00000032161	11	22243410	22416104	-1
ENSORLP00000019794	ENSORLG00000015806	5	28804376	28805560	1	ENSDARP00000085615	ENSDARG00000070621	11	22420047	22426759	1
ENSORLP00000019853	ENSORLG00000015849	5	29000414	29050918	1	ENSDARP00000112220	ENSDARG00000076120	11	22795868	22922639	1
ENSORLP00000019855	ENSORLG00000015854	5	29085376	29085633	1	ENSDARP00000108995	ENSDARG00000089564	11	22944255	22997866	1
ENSORLP00000019871	ENSORLG00000015866	5	29135033	29144493	-1	ENSDARP00000023719	ENSDARG00000010794	11	23125481	23145334	-1
ENSORLP00000019887	ENSORLG00000015880	5	29166807	29170330	-1	ENSDARP00000065995	ENSDARG00000044899	11	23197642	23205112	-1
ENSORLP00000019909	ENSORLG00000015900	5	29222590	29242340	1	ENSDARP00000103774	ENSDARG00000053205	11	23208378	23415328	1
ENSORLP00000019914	ENSORLG00000015906	5	29247203	29248515	-1	ENSDARP00000010347	ENSDARG00000009438	11	23430262	23432656	-1
ENSORLP00000019926	ENSORLG00000015916	5	29258645	29265589	-1	ENSDARP00000074651	ENSDARG00000057513	11	23826954	23850329	-1
Chain ID: 19	Score: 15.75	Medaka: chr17:23,556,422-23,962,448 (0.41 Mb)	Zebrafish: chr2:44,488,200-45,746,309 (1.26 Mb)
ENSORLP00000019537	ENSORLG00000015603	17	23556422	23563044	1	ENSDARP00000111010	ENSDARG00000053104	2	45721552	45746309	-1
ENSORLP00000019555	ENSORLG00000015621	17	23566181	23570952	1	ENSDARP00000069565	ENSDARG00000053101	2	45711070	45719039	-1
ENSORLP00000019570	ENSORLG00000015635	17	23597827	23605841	-1	ENSDARP00000128129	ENSDARG00000077096	2	45604229	45621782	1
ENSORLP00000019607	ENSORLG00000015659	17	23623235	23628513	1	ENSDARP00000099707	ENSDARG00000017311	2	45547080	45562794	-1
ENSORLP00000019621	ENSORLG00000015669	17	23630167	23638945	-1	ENSDARP00000077651	ENSDARG00000078136	2	45440130	45474806	1
ENSORLP00000019662	ENSORLG00000015700	17	23642386	23673897	-1	ENSDARP00000078392	ENSDARG00000059965	2	45346799	45431744	1
ENSORLP00000019680	ENSORLG00000015715	17	23719813	23724642	1	ENSDARP00000097691	ENSDARG00000076634	2	45201665	45215029	-1
ENSORLP00000019702	ENSORLG00000015731	17	23725780	23728504	1	ENSDARP00000107220	ENSDARG00000038585	2	45179241	45197004	-1
ENSORLP00000019708	ENSORLG00000015737	17	23738439	23741566	-1	ENSDARP00000069637	ENSDARG00000053158	2	45110791	45119741	1
ENSORLP00000019733	ENSORLG00000015755	17	23750466	23766136	1	ENSDARP00000100728	ENSDARG00000075886	2	45046044	45083205	-1
ENSORLP00000019741	ENSORLG00000015764	17	23767945	23772275	-1	ENSDARP00000069631	ENSDARG00000053155	2	45034277	45041929	1
ENSORLP00000019759	ENSORLG00000015778	17	23773613	23776616	1	ENSDARP00000018598	ENSDARG00000021398	2	45027032	45031166	-1
ENSORLP00000019767	ENSORLG00000015784	17	23784254	23785042	1	ENSDARP00000035352	ENSDARG00000025855	2	45006496	45007309	-1
ENSORLP00000019769	ENSORLG00000015786	17	23829123	23829425	-1	ENSDARP00000088895	ENSDARG00000068021	2	44843028	44984186	1
ENSORLP00000019775	ENSORLG00000015791	17	23871280	23876031	1	ENSDARP00000115672	ENSDARG00000079777	2	44759242	44782052	-1
ENSORLP00000019778	ENSORLG00000015794	17	23891441	23896456	-1	ENSDARP00000103910	ENSDARG00000078767	2	44677192	44754037	1
ENSORLP00000019802	ENSORLG00000015810	17	23902837	23911930	-1	ENSDARP00000088904	ENSDARG00000021739	2	44635373	44665745	1
ENSORLP00000019804	ENSORLG00000015812	17	23919102	23920370	-1	ENSDARP00000128211	ENSDARG00000079124	2	44607463	44618760	1
ENSORLP00000019807	ENSORLG00000015816	17	23924485	23927997	-1	ENSDARP00000129270	ENSDARG00000075008	2	44574233	44606763	1
ENSORLP00000019843	ENSORLG00000015844	17	23936019	23962448	-1	ENSDARP00000103111	ENSDARG00000040741	2	44488200	44571330	1
Chain ID: 20	Score: 15.50	Medaka: chr17:30,551,838-31,328,482 (0.78 Mb)	Zebrafish: chr2:30,441,997-31,483,658 (1.04 Mb)
ENSORLP00000022292	ENSORLG00000017817	17	30551838	30559225	-1	ENSDARP00000102087	ENSDARG00000077687	2	30441997	30448963	-1
ENSORLP00000022301	ENSORLG00000017823	17	30562554	30577469	1	ENSDARP00000092636	ENSDARG00000003531	2	30454930	30462298	1
ENSORLP00000022303	ENSORLG00000017826	17	30584840	30590255	-1	ENSDARP00000110022	ENSDARG00000038859	2	30471615	30499030	-1
ENSORLP00000022316	ENSORLG00000017832	17	30601072	30621863	1	ENSDARP00000089816	ENSDARG00000006370	2	30502242	30561418	1
ENSORLP00000022326	ENSORLG00000017839	17	30640849	30643557	1	ENSDARP00000022783	ENSDARG00000006894	2	30594022	30601180	1
ENSORLP00000022332	ENSORLG00000017844	17	30649639	30654306	1	ENSDARP00000115597	ENSDARG00000038855	2	30609430	30615673	1
ENSORLP00000022334	ENSORLG00000017846	17	30656945	30658775	1	ENSDARP00000017212	ENSDARG00000020895	2	30618957	30622511	1
ENSORLP00000022349	ENSORLG00000017856	17	30668232	30691428	1	ENSDARP00000117418	ENSDARG00000061249	2	30631848	30673475	1
ENSORLP00000022359	ENSORLG00000017868	17	30718123	30736578	-1	ENSDARP00000081460	ENSDARG00000061196	2	30701828	30732272	-1
ENSORLP00000022363	ENSORLG00000017872	17	30930079	30933215	-1	ENSDARP00000033245	ENSDARG00000027740	2	31015272	31017650	-1
ENSORLP00000022375	ENSORLG00000017875	17	30950650	30968074	1	ENSDARP00000009659	ENSDARG00000005941	2	31046612	31076617	1
ENSORLP00000022385	ENSORLG00000017883	17	30968906	30974434	-1	ENSDARP00000089759	ENSDARG00000055595	2	31079630	31089280	-1
ENSORLP00000022387	ENSORLG00000017886	17	30999918	31003605	1	ENSDARP00000111997	ENSDARG00000061140	2	31098754	31148635	1
ENSORLP00000022395	ENSORLG00000017890	17	31006156	31015663	1	ENSDARP00000120829	ENSDARG00000002127	2	31153424	31166369	1
ENSORLP00000022419	ENSORLG00000017911	17	31135124	31142790	1	ENSDARP00000104146	ENSDARG00000077219	2	31330393	31340510	1
ENSORLP00000022421	ENSORLG00000017914	17	31144174	31161681	-1	ENSDARP00000099673	ENSDARG00000075706	2	31343256	31377280	-1
ENSORLP00000022425	ENSORLG00000017918	17	31238465	31240331	1	ENSDARP00000116973	ENSDARG00000078729	2	31387267	31390125	1
ENSORLP00000022426	ENSORLG00000017919	17	31243162	31245720	-1	ENSDARP00000056678	ENSDARG00000038812	2	31393588	31401960	-1
ENSORLP00000022441	ENSORLG00000017927	17	31257370	31272052	-1	ENSDARP00000099746	ENSDARG00000078535	2	31403362	31426473	-1
ENSORLP00000022448	ENSORLG00000017936	17	31323568	31328482	-1	ENSDARP00000102064	ENSDARG00000079302	2	31480434	31483658	-1
Chain ID: 21	Score: 15.25	Medaka: chr19:1,582,337-2,168,801 (0.59 Mb)	Zebrafish: chr12:18,660,460-19,594,601 (0.93 Mb)
ENSORLP00000003852	ENSORLG00000003089	19	1582337	1583349	1	ENSDARP00000039692	ENSDARG00000029695	12	19592083	19594601	-1
ENSORLP00000003877	ENSORLG00000003112	19	1589993	1592836	-1	ENSDARP00000118004	ENSDARG00000003167	12	19570145	19577593	1
ENSORLP00000003887	ENSORLG00000003120	19	1594039	1598805	-1	ENSDARP00000084022	ENSDARG00000062442	12	19559160	19569440	1
ENSORLP00000003895	ENSORLG00000003128	19	1664289	1666299	-1	ENSDARP00000112853	ENSDARG00000045160	12	19555395	19557393	1
ENSORLP00000003906	ENSORLG00000003138	19	1666759	1669865	-1	ENSDARP00000084765	ENSDARG00000062446	12	19551107	19552018	1
ENSORLP00000003937	ENSORLG00000003163	19	1679994	1690555	1	ENSDARP00000126925	ENSDARG00000078132	12	19494643	19540535	-1
ENSORLP00000003961	ENSORLG00000003181	19	1699540	1702629	-1	ENSDARP00000073319	ENSDARG00000056374	12	19471742	19479825	1
ENSORLP00000003985	ENSORLG00000003200	19	1721554	1724641	1	ENSDARP00000073185	ENSDARG00000056270	12	19436855	19440217	-1
ENSORLP00000004040	ENSORLG00000003244	19	1725363	1737661	1	ENSDARP00000126856	ENSDARG00000009217	12	19408253	19434531	-1
ENSORLP00000004044	ENSORLG00000003248	19	1747367	1747737	-1	ENSDARP00000108269	ENSDARG00000086055	12	19384153	19388117	1
ENSORLP00000004110	ENSORLG00000003306	19	2024605	2030826	1	ENSDARP00000066406	ENSDARG00000045164	12	18916676	18924401	-1
ENSORLP00000004113	ENSORLG00000003309	19	2039875	2042557	-1	ENSDARP00000099025	ENSDARG00000077222	12	18894762	18901887	1
ENSORLP00000004169	ENSORLG00000003355	19	2046129	2070286	1	ENSDARP00000042005	ENSDARG00000029305	12	18870613	18891767	-1
ENSORLP00000004219	ENSORLG00000003392	19	2073970	2087857	1	ENSDARP00000084917	ENSDARG00000062515	12	18829497	18865039	-1
ENSORLP00000004225	ENSORLG00000003401	19	2089921	2090475	-1	ENSDARP00000099059	ENSDARG00000045166	12	18823460	18824014	1
ENSORLP00000004263	ENSORLG00000003430	19	2130601	2138943	1	ENSDARP00000073520	ENSDARG00000056559	12	18725209	18753177	-1
ENSORLP00000004278	ENSORLG00000003444	19	2140827	2145570	1	ENSDARP00000066410	ENSDARG00000045167	12	18701289	18721015	-1
ENSORLP00000004339	ENSORLG00000003486	19	2153132	2159899	-1	ENSDARP00000099444	ENSDARG00000075672	12	18671344	18686956	1
ENSORLP00000004354	ENSORLG00000003499	19	2160687	2168801	1	ENSDARP00000113730	ENSDARG00000093182	12	18660460	18670319	-1
Chain ID: 22	Score: 15.25	Medaka: chr22:12,396,319-12,770,432 (0.37 Mb)	Zebrafish: chr17:43,937,293-45,317,368 (1.38 Mb)
ENSORLP00000020205	ENSORLG00000016146	22	12396319	12401732	1	ENSDARP00000127531	ENSDARG00000075826	17	43937293	43966228	1
ENSORLP00000020238	ENSORLG00000016172	22	12405690	12417174	1	ENSDARP00000107134	ENSDARG00000032802	17	43992895	44048069	1
ENSORLP00000020248	ENSORLG00000016181	22	12422246	12430672	1	ENSDARP00000049502	ENSDARG00000029045	17	44077466	44126346	1
ENSORLP00000020256	ENSORLG00000016188	22	12442154	12464433	1	ENSDARP00000128742	ENSDARG00000076362	17	44162527	44237266	1
ENSORLP00000020261	ENSORLG00000016191	22	12485963	12487579	-1	ENSDARP00000111153	ENSDARG00000011235	17	44292301	44294007	-1
ENSORLP00000020273	ENSORLG00000016199	22	12548076	12555750	-1	ENSDARP00000104733	ENSDARG00000060323	17	44460554	44487262	-1
ENSORLP00000020287	ENSORLG00000016213	22	12556113	12559416	1	ENSDARP00000117738	ENSDARG00000031533	17	44487811	44500363	1
ENSORLP00000020314	ENSORLG00000016224	22	12573631	12578680	-1	ENSDARP00000129039	ENSDARG00000014487	17	44549264	44751173	-1
ENSORLP00000020318	ENSORLG00000016230	22	12659327	12671393	1	ENSDARP00000128481	ENSDARG00000075397	17	44923316	44927505	1
ENSORLP00000020323	ENSORLG00000016234	22	12674228	12674659	-1	ENSDARP00000098454	ENSDARG00000075170	17	44935517	44937719	-1
ENSORLP00000020353	ENSORLG00000016255	22	12694322	12709358	1	ENSDARP00000128675	ENSDARG00000004158	17	45000196	45088783	1
ENSORLP00000020358	ENSORLG00000016262	22	12717042	12718046	-1	ENSDARP00000069992	ENSDARG00000053475	17	45130208	45134094	-1
ENSORLP00000020375	ENSORLG00000016276	22	12724751	12735831	1	ENSDARP00000079444	ENSDARG00000060380	17	45176592	45195200	1
ENSORLP00000020393	ENSORLG00000016289	22	12737213	12741533	-1	ENSDARP00000069996	ENSDARG00000053481	17	45198293	45206530	-1
ENSORLP00000020424	ENSORLG00000016318	22	12761568	12763349	1	ENSDARP00000128101	ENSDARG00000027984	17	45272858	45280191	1
ENSORLP00000020432	ENSORLG00000016320	22	12763626	12766438	-1	ENSDARP00000097977	ENSDARG00000074100	17	45280723	45292529	-1
ENSORLP00000020438	ENSORLG00000016326	22	12769419	12770432	-1	ENSDARP00000128367	ENSDARG00000052390	17	45307351	45317368	-1
Chain ID: 23	Score: 15.25	Medaka: chr3:17,398,686-18,292,461 (0.89 Mb)	Zebrafish: chr7:27,972,944-29,947,295 (1.97 Mb)
ENSORLP00000008218	ENSORLG00000006545	3	17398686	17411510	1	ENSDARP00000073621	ENSDARG00000056648	7	27972944	28017658	1
ENSORLP00000008227	ENSORLG00000006554	3	17415582	17420918	-1	ENSDARP00000112442	ENSDARG00000088332	7	28023038	28050432	-1
ENSORLP00000008310	ENSORLG00000006617	3	17458275	17463288	1	ENSDARP00000106234	ENSDARG00000009346	7	28126599	28146587	1
ENSORLP00000008406	ENSORLG00000006696	3	17477740	17540577	1	ENSDARP00000103434	ENSDARG00000062220	7	28185198	28356775	1
ENSORLP00000008419	ENSORLG00000006705	3	17596145	17673222	1	ENSDARP00000124730	ENSDARG00000015536	7	28416399	28575250	1
ENSORLP00000008458	ENSORLG00000006737	3	17796104	17801782	1	ENSDARP00000073546	ENSDARG00000056587	7	28817515	28822306	1
ENSORLP00000008463	ENSORLG00000006744	3	17807033	17807816	-1	ENSDARP00000084073	ENSDARG00000062190	7	28828754	28924377	-1
ENSORLP00000008536	ENSORLG00000006792	3	17854800	17868738	1	ENSDARP00000073498	ENSDARG00000056557	7	28929371	28945815	1
ENSORLP00000008543	ENSORLG00000006802	3	17870673	17900589	1	ENSDARP00000052655	ENSDARG00000036252	7	28960237	29009887	1
ENSORLP00000008594	ENSORLG00000006838	3	17931225	17953689	1	ENSDARP00000084007	ENSDARG00000062165	7	29102934	29166846	1
ENSORLP00000008603	ENSORLG00000006849	3	17957960	17961587	-1	ENSDARP00000100108	ENSDARG00000075986	7	29175272	29184373	-1
ENSORLP00000008616	ENSORLG00000006857	3	18002373	18015929	-1	ENSDARP00000044207	ENSDARG00000034504	7	29446377	29484030	-1
ENSORLP00000008630	ENSORLG00000006868	3	18177098	18181306	-1	ENSDARP00000070968	ENSDARG00000054318	7	29711869	29739161	-1
ENSORLP00000008644	ENSORLG00000006881	3	18193293	18210189	-1	ENSDARP00000070982	ENSDARG00000054332	7	29761279	29788043	-1
ENSORLP00000008688	ENSORLG00000006916	3	18218625	18247082	-1	ENSDARP00000054367	ENSDARG00000037363	7	29801710	29857592	-1
ENSORLP00000008721	ENSORLG00000006942	3	18270081	18273713	-1	ENSDARP00000036199	ENSDARG00000025693	7	29896724	29901315	-1
ENSORLP00000008767	ENSORLG00000006978	3	18275204	18292461	-1	ENSDARP00000054365	ENSDARG00000037362	7	29906352	29947295	-1
Chain ID: 24	Score: 15.00	Medaka: chr4:8,020,992-8,774,021 (0.75 Mb)	Zebrafish: chr22:19,949,222-21,472,168 (1.52 Mb)
ENSORLP00000005765	ENSORLG00000004588	4	8020992	8028123	1	ENSDARP00000112483	ENSDARG00000034013	22	19949222	19964075	1
ENSORLP00000005783	ENSORLG00000004600	4	8038808	8211180	-1	ENSDARP00000087742	ENSDARG00000071375	22	19983966	20330015	-1
ENSORLP00000005838	ENSORLG00000004640	4	8290082	8292874	1	ENSDARP00000061616	ENSDARG00000042045	22	20490366	20496199	1
ENSORLP00000005972	ENSORLG00000004741	4	8296629	8334469	1	ENSDARP00000083036	ENSDARG00000061829	22	20513609	20559266	1
ENSORLP00000006065	ENSORLG00000004814	4	8337002	8347292	-1	ENSDARP00000082975	ENSDARG00000061810	22	20564913	20608276	-1
ENSORLP00000006111	ENSORLG00000004850	4	8350454	8352883	-1	ENSDARP00000048774	ENSDARG00000042029	22	20614884	20627983	-1
ENSORLP00000006200	ENSORLG00000004923	4	8363584	8380780	-1	ENSDARP00000111341	ENSDARG00000052383	22	20637762	20657159	-1
ENSORLP00000006223	ENSORLG00000004940	4	8408494	8412715	-1	ENSDARP00000014914	ENSDARG00000006609	22	20710530	20723104	-1
ENSORLP00000006265	ENSORLG00000004970	4	8416423	8428170	-1	ENSDARP00000096293	ENSDARG00000007081	22	20729331	20740006	-1
ENSORLP00000006269	ENSORLG00000004973	4	8432297	8433421	1	ENSDARP00000119225	ENSDARG00000071394	22	20747564	20749603	1
ENSORLP00000006282	ENSORLG00000004983	4	8462009	8473397	1	ENSDARP00000120476	ENSDARG00000056395	22	20781834	20793913	1
ENSORLP00000006331	ENSORLG00000005022	4	8479325	8491585	-1	ENSDARP00000083323	ENSDARG00000042285	22	20799768	20830802	-1
ENSORLP00000006340	ENSORLG00000005032	4	8528402	8530350	-1	ENSDARP00000083466	ENSDARG00000061970	22	20894208	20896025	-1
ENSORLP00000006347	ENSORLG00000005036	4	8574038	8578476	-1	ENSDARP00000096305	ENSDARG00000071403	22	21035462	21040711	-1
ENSORLP00000006358	ENSORLG00000005044	4	8585125	8587244	-1	ENSDARP00000015395	ENSDARG00000014357	22	21068970	21081954	-1
ENSORLP00000006385	ENSORLG00000005068	4	8597483	8614000	-1	ENSDARP00000083509	ENSDARG00000061992	22	21103261	21158357	-1
ENSORLP00000006407	ENSORLG00000005084	4	8621660	8639549	-1	ENSDARP00000091415	ENSDARG00000000568	22	21169853	21244942	-1
ENSORLP00000006432	ENSORLG00000005099	4	8641354	8645755	-1	ENSDARP00000000956	ENSDARG00000001734	22	21247028	21266741	-1
ENSORLP00000006476	ENSORLG00000005138	4	8765550	8774021	-1	ENSDARP00000016439	ENSDARG00000003655	22	21451363	21472168	-1
Chain ID: 25	Score: 15.00	Medaka: chr5:26,726,858-27,135,097 (0.41 Mb)	Zebrafish: chr11:25,899,742-26,609,245 (0.71 Mb)
ENSORLP00000017249	ENSORLG00000013752	5	26726858	26738016	1	ENSDARP00000009647	ENSDARG00000018423	11	25899742	25925852	1
ENSORLP00000017266	ENSORLG00000013769	5	26739721	26771098	1	ENSDARP00000111144	ENSDARG00000044874	11	25928457	25974199	1
ENSORLP00000017308	ENSORLG00000013802	5	26776970	26787394	1	ENSDARP00000018050	ENSDARG00000002750	11	25980198	25995750	1
ENSORLP00000017330	ENSORLG00000013821	5	26804835	26819704	1	ENSDARP00000105614	ENSDARG00000013087	11	26029788	26071894	1
ENSORLP00000017366	ENSORLG00000013852	5	26826439	26837922	1	ENSDARP00000012730	ENSDARG00000018840	11	26090944	26112307	1
ENSORLP00000017376	ENSORLG00000013861	5	26867978	26869906	-1	ENSDARP00000111412	ENSDARG00000056995	11	26185997	26190388	-1
ENSORLP00000017400	ENSORLG00000013875	5	26882636	26885256	1	ENSDARP00000107136	ENSDARG00000089724	11	26210653	26224882	1
ENSORLP00000017452	ENSORLG00000013917	5	26888986	26896601	1	ENSDARP00000065948	ENSDARG00000070545	11	26230045	26243838	1
ENSORLP00000017461	ENSORLG00000013925	5	26915646	26920771	1	ENSDARP00000107897	ENSDARG00000077883	11	26261761	26269869	1
ENSORLP00000017466	ENSORLG00000013930	5	26944601	26945578	-1	ENSDARP00000099244	ENSDARG00000070542	11	26316621	26317577	-1
ENSORLP00000017489	ENSORLG00000013948	5	26949578	26954117	1	ENSDARP00000094426	ENSDARG00000070541	11	26322398	26330132	1
ENSORLP00000017495	ENSORLG00000013954	5	26959732	26962708	1	ENSDARP00000083553	ENSDARG00000062002	11	26338668	26341824	1
ENSORLP00000017527	ENSORLG00000013980	5	26975400	26977221	-1	ENSDARP00000098204	ENSDARG00000013477	11	26345782	26350835	-1
ENSORLP00000017702	ENSORLG00000014117	5	27029797	27037390	1	ENSDARP00000005405	ENSDARG00000020595	11	26419421	26435904	1
ENSORLP00000017722	ENSORLG00000014134	5	27039596	27046484	1	ENSDARP00000128996	ENSDARG00000019457	11	26441688	26453220	1
ENSORLP00000017766	ENSORLG00000014161	5	27054599	27059926	1	ENSDARP00000032784	ENSDARG00000025718	11	26473473	26484292	1
ENSORLP00000017784	ENSORLG00000014176	5	27062545	27076690	1	ENSDARP00000031774	ENSDARG00000025699	11	26494191	26509067	1
ENSORLP00000017792	ENSORLG00000014183	5	27094118	27099013	1	ENSDARP00000119178	ENSDARG00000032856	11	26535410	26548058	1
ENSORLP00000017876	ENSORLG00000014253	5	27123688	27135097	1	ENSDARP00000101460	ENSDARG00000025671	11	26571786	26609245	1
Chain ID: 26	Score: 14.75	Medaka: chr13:9,185,801-9,604,007 (0.42 Mb)	Zebrafish: chr15:14,277,883-15,351,900 (1.07 Mb)
ENSORLP00000005388	ENSORLG00000004303	13	9185801	9197558	1	ENSDARP00000102964	ENSDARG00000074137	15	14277883	14324278	1
ENSORLP00000005425	ENSORLG00000004332	13	9210095	9218013	1	ENSDARP00000129228	ENSDARG00000015134	15	14335360	14350076	1
ENSORLP00000005432	ENSORLG00000004338	13	9229245	9232638	-1	ENSDARP00000096898	ENSDARG00000071658	15	14369108	14376022	-1
ENSORLP00000005441	ENSORLG00000004343	13	9238358	9239559	1	ENSDARP00000105734	ENSDARG00000090126	15	14394622	14400568	1
ENSORLP00000005477	ENSORLG00000004370	13	9254472	9255822	-1	ENSDARP00000092693	ENSDARG00000069823	15	14464948	14468700	-1
ENSORLP00000005485	ENSORLG00000004378	13	9261556	9263471	1	ENSDARP00000129362	ENSDARG00000079416	15	14475925	14478302	1
ENSORLP00000005508	ENSORLG00000004394	13	9264209	9267215	-1	ENSDARP00000012152	ENSDARG00000045628	15	14479569	14487341	-1
ENSORLP00000005550	ENSORLG00000004422	13	9285070	9293489	1	ENSDARP00000067094	ENSDARG00000045626	15	14498477	14532358	1
ENSORLP00000005579	ENSORLG00000004449	13	9297153	9327467	1	ENSDARP00000013849	ENSDARG00000003963	15	14535878	14610870	1
ENSORLP00000005658	ENSORLG00000004501	13	9403068	9403729	1	ENSDARP00000074788	ENSDARG00000057625	15	14895792	14896457	1
ENSORLP00000005692	ENSORLG00000004525	13	9412831	9448519	-1	ENSDARP00000102639	ENSDARG00000073926	15	14905788	15002183	-1
ENSORLP00000005738	ENSORLG00000004564	13	9458519	9470481	-1	ENSDARP00000119593	ENSDARG00000006615	15	15018516	15031831	-1
ENSORLP00000005746	ENSORLG00000004569	13	9496970	9498765	-1	ENSDARP00000108873	ENSDARG00000069790	15	15086054	15086434	-1
ENSORLP00000005807	ENSORLG00000004617	13	9505781	9510348	-1	ENSDARP00000074827	ENSDARG00000057661	15	15099222	15113751	-1
ENSORLP00000005860	ENSORLG00000004656	13	9516227	9535594	-1	ENSDARP00000127487	ENSDARG00000030945	15	15143075	15195313	-1
ENSORLP00000005891	ENSORLG00000004680	13	9538557	9540921	-1	ENSDARP00000062334	ENSDARG00000042509	15	15198036	15202504	-1
ENSORLP00000005918	ENSORLG00000004701	13	9548799	9600636	-1	ENSDARP00000037350	ENSDARG00000033978	15	15213770	15342490	-1
ENSORLP00000005922	ENSORLG00000004706	13	9602749	9604007	-1	ENSDARP00000075336	ENSDARG00000058079	15	15347793	15351900	-1
Chain ID: 27	Score: 14.50	Medaka: chr4:16,671,398-17,463,538 (0.79 Mb)	Zebrafish: chr6:30,878,553-32,198,604 (1.32 Mb)
ENSORLP00000012466	ENSORLG00000009937	4	16671398	16683167	-1	ENSDARP00000095387	ENSDARG00000070961	6	30878553	30916733	-1
ENSORLP00000012508	ENSORLG00000009969	4	16718301	16745952	-1	ENSDARP00000129415	ENSDARG00000079891	6	30975911	31028301	-1
ENSORLP00000012532	ENSORLG00000009987	4	16759110	16765397	-1	ENSDARP00000118870	ENSDARG00000006546	6	31045768	31053430	-1
ENSORLP00000012623	ENSORLG00000010063	4	16776777	16800094	1	ENSDARP00000037399	ENSDARG00000020625	6	31078227	31118391	1
ENSORLP00000012628	ENSORLG00000010073	4	16824258	16833392	-1	ENSDARP00000100010	ENSDARG00000075034	6	31127118	31268482	-1
ENSORLP00000012722	ENSORLG00000010145	4	16899619	16950905	-1	ENSDARP00000082397	ENSDARG00000061590	6	31283978	31431879	-1
ENSORLP00000012786	ENSORLG00000010196	4	16999113	17037168	-1	ENSDARP00000118145	ENSDARG00000015176	6	31465917	31679966	-1
ENSORLP00000012871	ENSORLG00000010265	4	17117221	17122668	-1	ENSDARP00000006510	ENSDARG00000013561	6	31702562	31717282	-1
ENSORLP00000012913	ENSORLG00000010304	4	17126577	17139516	-1	ENSDARP00000120948	ENSDARG00000020279	6	31721792	31737988	-1
ENSORLP00000012969	ENSORLG00000010347	4	17149021	17164402	-1	ENSDARP00000007903	ENSDARG00000017617	6	31757584	31779175	-1
ENSORLP00000012977	ENSORLG00000010359	4	17170902	17172098	-1	ENSDARP00000107660	ENSDARG00000021032	6	31784654	31785769	-1
ENSORLP00000013038	ENSORLG00000010404	4	17320321	17329100	-1	ENSDARP00000051778	ENSDARG00000044373	6	31994262	32006654	-1
ENSORLP00000013117	ENSORLG00000010464	4	17331510	17375288	1	ENSDARP00000042133	ENSDARG00000078675	6	32018380	32096391	1
ENSORLP00000013167	ENSORLG00000010503	4	17376994	17382899	-1	ENSDARP00000073367	ENSDARG00000056414	6	32097708	32103362	-1
ENSORLP00000013199	ENSORLG00000010528	4	17446203	17463538	1	ENSDARP00000127769	ENSDARG00000059473	6	32173529	32198604	1
Chain ID: 28	Score: 14.50	Medaka: chr7:12,708,598-13,029,390 (0.32 Mb)	Zebrafish: chr23:35,839,737-36,493,237 (0.65 Mb)
ENSORLP00000009811	ENSORLG00000007829	7	12708598	12710626	-1	ENSDARP00000004281	ENSDARG00000015997	23	35839737	35841182	-1
ENSORLP00000009848	ENSORLG00000007861	7	12754497	12771442	1	ENSDARP00000093932	ENSDARG00000034117	23	35937387	36014974	1
ENSORLP00000009884	ENSORLG00000007883	7	12780342	12787628	-1	ENSDARP00000093924	ENSDARG00000036695	23	36034592	36052234	-1
ENSORLP00000009904	ENSORLG00000007896	7	12836622	12839109	1	ENSDARP00000093923	ENSDARG00000070353	23	36104522	36107223	1
ENSORLP00000009912	ENSORLG00000007902	7	12845783	12847612	1	ENSDARP00000093921	ENSDARG00000070352	23	36115143	36116726	1
ENSORLP00000009920	ENSORLG00000007909	7	12857047	12859668	1	ENSDARP00000093920	ENSDARG00000070351	23	36126453	36128741	1
ENSORLP00000009924	ENSORLG00000007913	7	12866025	12868492	1	ENSDARP00000053294	ENSDARG00000070348	23	36135161	36137910	1
ENSORLP00000009951	ENSORLG00000007935	7	12875582	12892933	1	ENSDARP00000093809	ENSDARG00000070343	23	36167085	36168365	1
ENSORLP00000009961	ENSORLG00000007942	7	12894255	12895996	1	ENSDARP00000093908	ENSDARG00000070340	23	36170282	36171801	1
ENSORLP00000009978	ENSORLG00000007955	7	12904751	12906052	1	ENSDARP00000093906	ENSDARG00000070338	23	36182607	36183933	1
ENSORLP00000009938	ENSORLG00000007924	7	12913829	12915920	1	ENSDARP00000129398	ENSDARG00000070339	23	36196582	36199592	1
ENSORLP00000009999	ENSORLG00000007971	7	12970427	12973774	-1	ENSDARP00000115557	ENSDARG00000061187	23	36350731	36354742	-1
ENSORLP00000010036	ENSORLG00000008001	7	12973905	12977199	1	ENSDARP00000053266	ENSDARG00000036675	23	36358137	36360689	1
ENSORLP00000010067	ENSORLG00000008024	7	12988767	12992637	1	ENSDARP00000015008	ENSDARG00000017844	23	36392073	36405240	1
ENSORLP00000010075	ENSORLG00000008031	7	13017866	13020209	-1	ENSDARP00000047706	ENSDARG00000061174	23	36454172	36465661	-1
ENSORLP00000010107	ENSORLG00000008058	7	13023428	13029390	-1	ENSDARP00000024113	ENSDARG00000026348	23	36476661	36493237	-1
Chain ID: 29	Score: 14.25	Medaka: chr3:27,871,799-29,662,799 (1.79 Mb)	Zebrafish: chr7:36,723,560-39,311,418 (2.59 Mb)
ENSORLP00000016818	ENSORLG00000013412	3	27871799	27883809	1	ENSDARP00000098728	ENSDARG00000079216	7	36723560	36736777	1
ENSORLP00000016950	ENSORLG00000013517	3	27887820	27899602	-1	ENSDARP00000024612	ENSDARG00000014378	7	36738784	36768914	-1
ENSORLP00000017075	ENSORLG00000013608	3	27949181	27972905	-1	ENSDARP00000008096	ENSDARG00000016141	7	36806434	36834403	-1
ENSORLP00000017107	ENSORLG00000013637	3	27983356	27992158	-1	ENSDARP00000069449	ENSDARG00000053010	7	36848393	36862837	-1
ENSORLP00000017172	ENSORLG00000013688	3	27995158	28007470	-1	ENSDARP00000006091	ENSDARG00000017676	7	36865577	36887369	-1
ENSORLP00000017182	ENSORLG00000013697	3	28053967	28057472	-1	ENSDARP00000045627	ENSDARG00000034420	7	36967535	36970609	-1
ENSORLP00000017199	ENSORLG00000013711	3	28199704	28203874	-1	ENSDARP00000043856	ENSDARG00000034043	7	37161748	37164660	-1
ENSORLP00000017219	ENSORLG00000013729	3	28651497	28690132	-1	ENSDARP00000107656	ENSDARG00000044216	7	37439723	37685081	-1
ENSORLP00000017242	ENSORLG00000013747	3	28761692	28765569	1	ENSDARP00000122322	ENSDARG00000026862	7	37797143	37809694	1
ENSORLP00000017318	ENSORLG00000013810	3	28814370	28840102	1	ENSDARP00000014936	ENSDARG00000074498	7	37825859	37945670	1
ENSORLP00000017336	ENSORLG00000013827	3	29316967	29326724	1	ENSDARP00000102655	ENSDARG00000074319	7	38769466	38781693	1
ENSORLP00000017416	ENSORLG00000013891	3	29434808	29444644	-1	ENSDARP00000124380	ENSDARG00000010756	7	38948260	38955412	-1
ENSORLP00000017425	ENSORLG00000013899	3	29460563	29493253	-1	ENSDARP00000052378	ENSDARG00000020053	7	38977963	39014255	-1
ENSORLP00000017520	ENSORLG00000013973	3	29572500	29604054	-1	ENSDARP00000107915	ENSDARG00000060070	7	39159859	39204278	-1
ENSORLP00000017537	ENSORLG00000013989	3	29634369	29651923	-1	ENSDARP00000078717	ENSDARG00000060071	7	39255031	39287607	-1
ENSORLP00000017577	ENSORLG00000014021	3	29653119	29662799	-1	ENSDARP00000052367	ENSDARG00000036076	7	39290884	39311418	-1
Chain ID: 30	Score: 13.75	Medaka: chr13:4,132,127-5,610,015 (1.48 Mb)	Zebrafish: chr18:40,172,458-43,125,705 (2.95 Mb)
ENSORLP00000002685	ENSORLG00000002162	13	4132127	4133413	-1	ENSDARP00000119009	ENSDARG00000068219	18	43124443	43125705	1
ENSORLP00000002737	ENSORLG00000002201	13	4141028	4152115	-1	ENSDARP00000009285	ENSDARG00000020405	18	43090716	43112841	1
ENSORLP00000002832	ENSORLG00000002285	13	4183077	4186662	1	ENSDARP00000025160	ENSDARG00000020454	18	43032852	43040259	-1
ENSORLP00000002861	ENSORLG00000002308	13	4200509	4208769	-1	ENSDARP00000081377	ENSDARG00000061168	18	42984041	43006440	1
ENSORLP00000002895	ENSORLG00000002334	13	4210805	4224393	-1	ENSDARP00000081386	ENSDARG00000061173	18	42949597	42980844	1
ENSORLP00000003001	ENSORLG00000002416	13	4294044	4306257	1	ENSDARP00000059045	ENSDARG00000022161	18	42723565	42773252	-1
ENSORLP00000003036	ENSORLG00000002446	13	4421533	4441762	1	ENSDARP00000081773	ENSDARG00000061328	18	42454659	42506053	-1
ENSORLP00000003048	ENSORLG00000002455	13	4487446	4492372	1	ENSDARP00000123831	ENSDARG00000055054	18	42297520	42319434	-1
ENSORLP00000003081	ENSORLG00000002476	13	4493683	4495025	-1	ENSDARP00000010091	ENSDARG00000010514	18	42294251	42295255	1
ENSORLP00000003114	ENSORLG00000002506	13	4506003	4514515	1	ENSDARP00000081816	ENSDARG00000061338	18	42272063	42280763	-1
ENSORLP00000003131	ENSORLG00000002521	13	4519661	4526794	1	ENSDARP00000098710	ENSDARG00000077911	18	42247280	42267697	-1
ENSORLP00000003137	ENSORLG00000002527	13	4925498	4955964	-1	ENSDARP00000078889	ENSDARG00000052630	18	41556150	41562341	1
ENSORLP00000003152	ENSORLG00000002535	13	5138514	5141026	1	ENSDARP00000017354	ENSDARG00000011693	18	41173625	41177318	-1
ENSORLP00000003263	ENSORLG00000002616	13	5322423	5428022	1	ENSDARP00000089410	ENSDARG00000021584	18	40543140	40907607	-1
ENSORLP00000003295	ENSORLG00000002644	13	5478588	5583880	1	ENSDARP00000009077	ENSDARG00000010654	18	40247219	40463254	-1
ENSORLP00000003304	ENSORLG00000002651	13	5592285	5594039	-1	ENSDARP00000109370	ENSDARG00000035966	18	40220076	40238456	1
ENSORLP00000003354	ENSORLG00000002690	13	5601539	5610015	-1	ENSDARP00000129653	ENSDARG00000067730	18	40172458	40208286	1
Chain ID: 31	Score: 13.75	Medaka: chr16:17,642,288-18,398,684 (0.76 Mb)	Zebrafish: chr16:11,905,959-13,574,232 (1.67 Mb)
ENSORLP00000016266	ENSORLG00000012978	16	17642288	17645644	-1	ENSDARP00000094800	ENSDARG00000037998	16	11905959	11932451	-1
ENSORLP00000016277	ENSORLG00000012987	16	17651296	17654950	1	ENSDARP00000055379	ENSDARG00000037997	16	11935923	11943666	1
ENSORLP00000016287	ENSORLG00000012996	16	17677763	17683039	1	ENSDARP00000075535	ENSDARG00000058248	16	11970200	11976960	1
ENSORLP00000016297	ENSORLG00000013007	16	17686343	17687749	-1	ENSDARP00000075557	ENSDARG00000058262	16	12007190	12013650	-1
ENSORLP00000016309	ENSORLG00000013015	16	17690983	17693598	1	ENSDARP00000028787	ENSDARG00000022939	16	12023336	12029407	1
ENSORLP00000016375	ENSORLG00000013063	16	17701208	17719900	1	ENSDARP00000103413	ENSDARG00000044575	16	12041286	12085104	1
ENSORLP00000016435	ENSORLG00000013112	16	17720447	17729610	-1	ENSDARP00000104594	ENSDARG00000078929	16	12087481	12126376	-1
ENSORLP00000016462	ENSORLG00000013133	16	17774476	17787686	1	ENSDARP00000085674	ENSDARG00000062831	16	12167351	12243118	1
ENSORLP00000016547	ENSORLG00000013202	16	17868068	17870068	-1	ENSDARP00000028630	ENSDARG00000004171	16	12534315	12538501	-1
ENSORLP00000016575	ENSORLG00000013228	16	17943003	17948809	1	ENSDARP00000049322	ENSDARG00000019658	16	12623290	12691415	1
ENSORLP00000016612	ENSORLG00000013259	16	18047145	18073651	1	ENSDARP00000072328	ENSDARG00000055502	16	12870558	12925121	1
ENSORLP00000016653	ENSORLG00000013290	16	18075702	18081202	-1	ENSDARP00000103355	ENSDARG00000077143	16	12931801	12939427	-1
ENSORLP00000016709	ENSORLG00000013330	16	18083139	18098289	1	ENSDARP00000011670	ENSDARG00000015681	16	12946431	12994488	1
ENSORLP00000016723	ENSORLG00000013344	16	18115300	18124994	1	ENSDARP00000108333	ENSDARG00000087074	16	13007235	13048589	1
ENSORLP00000016770	ENSORLG00000013374	16	18203212	18246227	1	ENSDARP00000106550	ENSDARG00000075764	16	13187786	13305706	1
ENSORLP00000016824	ENSORLG00000013418	16	18370952	18375751	-1	ENSDARP00000120580	ENSDARG00000058047	16	13525489	13528799	-1
ENSORLP00000016852	ENSORLG00000013437	16	18381483	18384227	-1	ENSDARP00000098992	ENSDARG00000058045	16	13536061	13539030	-1
ENSORLP00000016868	ENSORLG00000013448	16	18388814	18389339	-1	ENSDARP00000116800	ENSDARG00000041115	16	13540975	13547930	-1
ENSORLP00000016880	ENSORLG00000013459	16	18397058	18398684	1	ENSDARP00000122984	ENSDARG00000041041	16	13569768	13574232	1
Chain ID: 32	Score: 13.75	Medaka: chr8:7,212,730-7,620,551 (0.41 Mb)	Zebrafish: chr3:42,515,943-43,998,893 (1.48 Mb)
ENSORLP00000005850	ENSORLG00000004648	8	7212730	7215066	-1	ENSDARP00000103370	ENSDARG00000078141	3	43996539	43998893	1
ENSORLP00000005853	ENSORLG00000004653	8	7344550	7346122	1	ENSDARP00000040722	ENSDARG00000030897	3	43695696	43696155	-1
ENSORLP00000005890	ENSORLG00000004676	8	7348445	7371236	1	ENSDARP00000055153	ENSDARG00000037857	3	43659174	43690351	-1
ENSORLP00000005899	ENSORLG00000004687	8	7375333	7375883	-1	ENSDARP00000118205	ENSDARG00000033709	3	43647810	43650730	1
ENSORLP00000005959	ENSORLG00000004733	8	7390690	7405804	1	ENSDARP00000077497	ENSDARG00000059631	3	43554695	43615651	-1
ENSORLP00000005964	ENSORLG00000004744	8	7411978	7414201	1	ENSDARP00000049364	ENSDARG00000029117	3	43523523	43528907	-1
ENSORLP00000005970	ENSORLG00000004746	8	7416845	7419205	1	ENSDARP00000113499	ENSDARG00000052694	3	43480952	43513247	-1
ENSORLP00000005997	ENSORLG00000004768	8	7509328	7512729	1	ENSDARP00000110232	ENSDARG00000003283	3	43222741	43240892	-1
ENSORLP00000006004	ENSORLG00000004773	8	7531479	7538316	1	ENSDARP00000128014	ENSDARG00000044969	3	43140041	43147900	-1
ENSORLP00000006039	ENSORLG00000004794	8	7549801	7565752	-1	ENSDARP00000036978	ENSDARG00000026534	3	42963213	43028443	1
ENSORLP00000006068	ENSORLG00000004820	8	7580467	7581590	-1	ENSDARP00000100245	ENSDARG00000074579	3	42839231	42852063	1
ENSORLP00000006128	ENSORLG00000004865	8	7585201	7599623	1	ENSDARP00000003298	ENSDARG00000021047	3	42802510	42833716	-1
ENSORLP00000006136	ENSORLG00000004871	8	7600311	7601184	-1	ENSDARP00000100350	ENSDARG00000074444	3	42774929	42779725	1
ENSORLP00000006143	ENSORLG00000004878	8	7602423	7604880	-1	ENSDARP00000110677	ENSDARG00000059622	3	42655042	42667634	1
ENSORLP00000006192	ENSORLG00000004919	8	7607344	7614219	1	ENSDARP00000104865	ENSDARG00000091498	3	42628536	42650125	-1
ENSORLP00000006206	ENSORLG00000004931	8	7616886	7620551	-1	ENSDARP00000124888	ENSDARG00000037844	3	42515943	42528272	1
Chain ID: 33	Score: 13.75	Medaka: chr9:1,785,320-2,397,776 (0.61 Mb)	Zebrafish: chr5:12,333,016-13,788,981 (1.46 Mb)
ENSORLP00000001020	ENSORLG00000000830	9	1785320	1802496	-1	ENSDARP00000108900	ENSDARG00000086512	5	12333016	12359521	-1
ENSORLP00000001033	ENSORLG00000000843	9	1806421	1828666	1	ENSDARP00000098193	ENSDARG00000079757	5	12398364	12450024	1
ENSORLP00000001038	ENSORLG00000000848	9	1852670	1854843	1	ENSDARP00000012556	ENSDARG00000010602	5	12495993	12501982	1
ENSORLP00000001046	ENSORLG00000000855	9	1874376	1900306	-1	ENSDARP00000102690	ENSDARG00000078272	5	12592146	12599858	-1
ENSORLP00000001097	ENSORLG00000000897	9	1963791	2002241	-1	ENSDARP00000120670	ENSDARG00000020204	5	12816262	12897153	-1
ENSORLP00000001114	ENSORLG00000000914	9	2004203	2013030	1	ENSDARP00000102614	ENSDARG00000076611	5	12900476	12924937	1
ENSORLP00000001124	ENSORLG00000000922	9	2015419	2021618	1	ENSDARP00000035258	ENSDARG00000028346	5	12929405	12951283	1
ENSORLP00000001146	ENSORLG00000000944	9	2045648	2058805	-1	ENSDARP00000069465	ENSDARG00000053019	5	13005955	13030905	-1
ENSORLP00000001158	ENSORLG00000000953	9	2059928	2062789	1	ENSDARP00000100969	ENSDARG00000078315	5	13032714	13048154	1
ENSORLP00000001226	ENSORLG00000001000	9	2111966	2120585	-1	ENSDARP00000026717	ENSDARG00000005320	5	13121519	13151463	-1
ENSORLP00000001295	ENSORLG00000001050	9	2152051	2203599	-1	ENSDARP00000090595	ENSDARG00000068910	5	13189049	13313986	-1
ENSORLP00000001306	ENSORLG00000001059	9	2257096	2357253	-1	ENSDARP00000105920	ENSDARG00000094526	5	13379697	13501138	-1
ENSORLP00000001325	ENSORLG00000001071	9	2376662	2380483	1	ENSDARP00000051669	ENSDARG00000035634	5	13731165	13751645	1
ENSORLP00000001337	ENSORLG00000001084	9	2381006	2384233	-1	ENSDARP00000119398	ENSDARG00000058608	5	13752222	13762938	-1
ENSORLP00000001347	ENSORLG00000001091	9	2388808	2397776	-1	ENSDARP00000075935	ENSDARG00000058605	5	13765562	13788981	-1
Chain ID: 34	Score: 13.25	Medaka: chr11:21,411,867-21,781,776 (0.37 Mb)	Zebrafish: chr19:44,194,230-44,805,126 (0.61 Mb)
ENSORLP00000014011	ENSORLG00000011169	11	21411867	21415497	-1	ENSDARP00000111991	ENSDARG00000086137	19	44793343	44805126	1
ENSORLP00000014384	ENSORLG00000011482	11	21524079	21548190	-1	ENSDARP00000105558	ENSDARG00000023145	19	44657609	44692582	1
ENSORLP00000014457	ENSORLG00000011539	11	21569353	21573658	-1	ENSDARP00000038728	ENSDARG00000023160	19	44607457	44619057	1
ENSORLP00000014486	ENSORLG00000011563	11	21575521	21577968	1	ENSDARP00000088874	ENSDARG00000018936	19	44600333	44605544	-1
ENSORLP00000014497	ENSORLG00000011573	11	21581730	21585470	-1	ENSDARP00000039143	ENSDARG00000023290	19	44586629	44595943	1
ENSORLP00000014507	ENSORLG00000011581	11	21594827	21599230	1	ENSDARP00000115462	ENSDARG00000078997	19	44541649	44548860	-1
ENSORLP00000014528	ENSORLG00000011594	11	21603120	21610742	1	ENSDARP00000081094	ENSDARG00000061057	19	44522375	44531406	-1
ENSORLP00000014545	ENSORLG00000011606	11	21614939	21617994	-1	ENSDARP00000126062	ENSDARG00000061081	19	44497498	44519568	1
ENSORLP00000014611	ENSORLG00000011651	11	21636055	21649657	-1	ENSDARP00000031677	ENSDARG00000025269	19	44450215	44476523	1
ENSORLP00000014677	ENSORLG00000011706	11	21653804	21669355	-1	ENSDARP00000100868	ENSDARG00000018000	19	44409917	44444355	1
ENSORLP00000014738	ENSORLG00000011760	11	21672762	21724140	-1	ENSDARP00000039870	ENSDARG00000020345	19	44297006	44404344	1
ENSORLP00000014782	ENSORLG00000011797	11	21727858	21743053	-1	ENSDARP00000018003	ENSDARG00000012135	19	44263200	44285118	1
ENSORLP00000014849	ENSORLG00000011852	11	21764571	21769878	-1	ENSDARP00000021474	ENSDARG00000018010	19	44211939	44220220	1
ENSORLP00000014883	ENSORLG00000011880	11	21770430	21781776	1	ENSDARP00000022147	ENSDARG00000005023	19	44194230	44210013	-1
Chain ID: 35	Score: 13.25	Medaka: chr24:4,782,664-5,611,453 (0.83 Mb)	Zebrafish: chr20:50,253,082-52,538,835 (2.29 Mb)
ENSORLP00000014484	ENSORLG00000011562	24	4782664	4791382	-1	ENSDARP00000124029	ENSDARG00000026811	20	50253082	50273765	-1
ENSORLP00000014521	ENSORLG00000011588	24	4809543	4814281	1	ENSDARP00000088500	ENSDARG00000067838	20	50327587	50357658	1
ENSORLP00000014579	ENSORLG00000011628	24	4816588	4822997	1	ENSDARP00000047211	ENSDARG00000028971	20	50365657	50398124	1
ENSORLP00000014608	ENSORLG00000011649	24	4839626	4867147	1	ENSDARP00000032788	ENSDARG00000067509	20	50427763	50510462	1
ENSORLP00000014657	ENSORLG00000011692	24	5120540	5166929	1	ENSDARP00000106843	ENSDARG00000088117	20	50966943	51057204	1
ENSORLP00000014730	ENSORLG00000011754	24	5338437	5384102	1	ENSDARP00000082385	ENSDARG00000061586	20	51184204	51332962	1
ENSORLP00000014772	ENSORLG00000011789	24	5391416	5402913	1	ENSDARP00000022809	ENSDARG00000004721	20	51347035	51416083	1
ENSORLP00000014798	ENSORLG00000011809	24	5404150	5408085	-1	ENSDARP00000022320	ENSDARG00000011175	20	51424573	51435202	-1
ENSORLP00000014878	ENSORLG00000011874	24	5411982	5419669	-1	ENSDARP00000099488	ENSDARG00000006395	20	51467193	51517698	-1
ENSORLP00000014899	ENSORLG00000011892	24	5422925	5426306	1	ENSDARP00000014978	ENSDARG00000029150	20	51534377	51546157	1
ENSORLP00000014926	ENSORLG00000011916	24	5436046	5440012	-1	ENSDARP00000020170	ENSDARG00000007886	20	51574472	51602005	-1
ENSORLP00000014945	ENSORLG00000011928	24	5455312	5456763	1	ENSDARP00000078621	ENSDARG00000060034	20	51650296	51670891	1
ENSORLP00000014951	ENSORLG00000011934	24	5462575	5463968	-1	ENSDARP00000125702	ENSDARG00000077387	20	51681585	51692444	-1
ENSORLP00000015002	ENSORLG00000011976	24	5467197	5473406	-1	ENSDARP00000125628	ENSDARG00000044949	20	51701039	51723663	-1
ENSORLP00000015031	ENSORLG00000012003	24	5474334	5480403	1	ENSDARP00000026849	ENSDARG00000014532	20	52069663	52092215	1
ENSORLP00000015067	ENSORLG00000012031	24	5483505	5496347	-1	ENSDARP00000060504	ENSDARG00000008184	20	52098297	52170514	-1
ENSORLP00000015077	ENSORLG00000012043	24	5501295	5504549	1	ENSDARP00000107952	ENSDARG00000052471	20	52171946	52212916	1
ENSORLP00000015094	ENSORLG00000012055	24	5608534	5611453	-1	ENSDARP00000116160	ENSDARG00000009134	20	52535467	52538835	-1
Chain ID: 36	Score: 13.00	Medaka: chr22:11,222,933-11,580,616 (0.36 Mb)	Zebrafish: chr17:30,903,002-31,638,769 (0.74 Mb)
ENSORLP00000019289	ENSORLG00000015409	22	11222933	11241910	1	ENSDARP00000100448	ENSDARG00000075072	17	31595026	31638769	-1
ENSORLP00000019323	ENSORLG00000015434	22	11295573	11334985	1	ENSDARP00000061546	ENSDARG00000042861	17	31459817	31542520	-1
ENSORLP00000019334	ENSORLG00000015444	22	11338926	11350730	-1	ENSDARP00000062899	ENSDARG00000042856	17	31422428	31452282	1
ENSORLP00000019384	ENSORLG00000015483	22	11353845	11367194	1	ENSDARP00000112435	ENSDARG00000042853	17	31406358	31419981	-1
ENSORLP00000019391	ENSORLG00000015487	22	11415780	11417743	-1	ENSDARP00000071411	ENSDARG00000054700	17	31296979	31298094	1
ENSORLP00000019401	ENSORLG00000015496	22	11425577	11427140	-1	ENSDARP00000102439	ENSDARG00000073962	17	31281273	31287586	1
ENSORLP00000019426	ENSORLG00000015512	22	11428017	11430111	1	ENSDARP00000118411	ENSDARG00000042848	17	31273909	31279163	-1
ENSORLP00000019433	ENSORLG00000015516	22	11434643	11437039	1	ENSDARP00000080946	ENSDARG00000060992	17	31264393	31271530	-1
ENSORLP00000019444	ENSORLG00000015526	22	11440707	11451781	-1	ENSDARP00000105116	ENSDARG00000042846	17	31244522	31261376	1
ENSORLP00000019449	ENSORLG00000015532	22	11458701	11465839	1	ENSDARP00000055753	ENSDARG00000038235	17	31212086	31223329	-1
ENSORLP00000019505	ENSORLG00000015575	22	11490733	11521740	1	ENSDARP00000104791	ENSDARG00000042840	17	31039177	31117774	-1
ENSORLP00000019561	ENSORLG00000015624	22	11524911	11559248	1	ENSDARP00000109709	ENSDARG00000035650	17	30960438	31034723	-1
ENSORLP00000019566	ENSORLG00000015632	22	11561336	11562714	-1	ENSDARP00000110231	ENSDARG00000042544	17	30953759	30958884	1
ENSORLP00000019624	ENSORLG00000015670	22	11572158	11580616	-1	ENSDARP00000124672	ENSDARG00000042793	17	30903002	30914608	1
Chain ID: 37	Score: 12.75	Medaka: chr15:29,366,113-29,526,200 (0.16 Mb)	Zebrafish: chr13:25,673,646-25,997,790 (0.32 Mb)
ENSORLP00000017210	ENSORLG00000013722	15	29366113	29366541	1	ENSDARP00000092102	ENSDARG00000069552	13	25673646	25674050	1
ENSORLP00000017220	ENSORLG00000013731	15	29369729	29374015	1	ENSDARP00000119061	ENSDARG00000022503	13	25679209	25694921	1
ENSORLP00000017306	ENSORLG00000013798	15	29377052	29385891	-1	ENSDARP00000122887	ENSDARG00000009525	13	25697113	25708511	-1
ENSORLP00000017319	ENSORLG00000013813	15	29387596	29390519	1	ENSDARP00000057688	ENSDARG00000039486	13	25710579	25721836	1
ENSORLP00000017391	ENSORLG00000013866	15	29392617	29400785	1	ENSDARP00000082038	ENSDARG00000061437	13	25729470	25756377	1
ENSORLP00000017399	ENSORLG00000013874	15	29402671	29403279	-1	ENSDARP00000120704	ENSDARG00000055314	13	25759235	25772621	-1
ENSORLP00000017437	ENSORLG00000013906	15	29453710	29457245	1	ENSDARP00000081987	ENSDARG00000061413	13	25773365	25789800	1
ENSORLP00000017460	ENSORLG00000013924	15	29460553	29466315	-1	ENSDARP00000081967	ENSDARG00000061400	13	25795113	25805193	-1
ENSORLP00000017508	ENSORLG00000013965	15	29469670	29478081	-1	ENSDARP00000072093	ENSDARG00000055305	13	25809246	25856537	-1
ENSORLP00000017551	ENSORLG00000014004	15	29486727	29504470	-1	ENSDARP00000121103	ENSDARG00000091212	13	25865997	25943483	-1
ENSORLP00000017582	ENSORLG00000014027	15	29506049	29507735	1	ENSDARP00000046049	ENSDARG00000031981	13	25945004	25950058	1
ENSORLP00000017616	ENSORLG00000014050	15	29508744	29513331	-1	ENSDARP00000098071	ENSDARG00000061375	13	25953364	25974639	-1
ENSORLP00000017698	ENSORLG00000014111	15	29521042	29526200	-1	ENSDARP00000046980	ENSDARG00000019845	13	25987270	25997790	-1
Chain ID: 38	Score: 12.75	Medaka: chr17:17,875,056-18,502,734 (0.63 Mb)	Zebrafish: chr2:37,742,768-38,591,678 (0.85 Mb)
ENSORLP00000015085	ENSORLG00000012045	17	17875056	17882450	1	ENSDARP00000056539	ENSDARG00000038716	2	37742768	37756076	1
ENSORLP00000015107	ENSORLG00000012065	17	17896384	17899920	-1	ENSDARP00000056543	ENSDARG00000002031	2	37770967	37782833	-1
ENSORLP00000015149	ENSORLG00000012103	17	17901514	17921528	-1	ENSDARP00000122217	ENSDARG00000075543	2	37790978	37817128	-1
ENSORLP00000015163	ENSORLG00000012116	17	17924992	17926099	-1	ENSDARP00000122371	ENSDARG00000068232	2	37824319	37826832	-1
ENSORLP00000015183	ENSORLG00000012133	17	17928649	17933116	-1	ENSDARP00000089346	ENSDARG00000068240	2	37831005	37841977	-1
ENSORLP00000015212	ENSORLG00000012159	17	17947511	17958388	1	ENSDARP00000044263	ENSDARG00000008388	2	37864455	37884171	1
ENSORLP00000015266	ENSORLG00000012196	17	17985010	17985554	1	ENSDARP00000123563	ENSDARG00000054292	2	37929800	37932607	1
ENSORLP00000015285	ENSORLG00000012212	17	18003959	18008127	1	ENSDARP00000070950	ENSDARG00000054300	2	37967722	37972137	1
ENSORLP00000015294	ENSORLG00000012220	17	18012640	18014601	1	ENSDARP00000042099	ENSDARG00000054304	2	37976464	37978416	1
ENSORLP00000015301	ENSORLG00000012225	17	18017160	18020216	-1	ENSDARP00000122098	ENSDARG00000093723	2	37980096	37984674	-1
ENSORLP00000015327	ENSORLG00000012249	17	18023479	18024978	-1	ENSDARP00000116459	ENSDARG00000038720	2	37985610	37987494	-1
ENSORLP00000015355	ENSORLG00000012273	17	18028626	18030327	-1	ENSDARP00000061676	ENSDARG00000054313	2	37988796	37990718	-1
ENSORLP00000015421	ENSORLG00000012317	17	18035532	18047385	-1	ENSDARP00000070975	ENSDARG00000054337	2	37992902	38014304	-1
ENSORLP00000015467	ENSORLG00000012353	17	18051598	18060308	-1	ENSDARP00000082459	ENSDARG00000079605	2	38045615	38065771	-1
ENSORLP00000015499	ENSORLG00000012385	17	18216932	18356620	1	ENSDARP00000100089	ENSDARG00000077996	2	38257744	38413083	1
ENSORLP00000015545	ENSORLG00000012421	17	18431724	18502734	1	ENSDARP00000106132	ENSDARG00000086990	2	38446369	38591678	1
Chain ID: 39	Score: 12.75	Medaka: chr6:11,937,694-12,595,361 (0.66 Mb)	Zebrafish: chr25:33,503,547-35,695,252 (2.19 Mb)
ENSORLP00000009456	ENSORLG00000007542	6	11937694	11947851	1	ENSDARP00000081884	ENSDARG00000061368	25	35672623	35695252	-1
ENSORLP00000009467	ENSORLG00000007552	6	11959702	11975080	-1	ENSDARP00000128798	ENSDARG00000045556	25	35591186	35641898	1
ENSORLP00000009471	ENSORLG00000007558	6	12020017	12021057	1	ENSDARP00000079686	ENSDARG00000060471	25	35353099	35354397	-1
ENSORLP00000009486	ENSORLG00000007570	6	12024079	12027880	-1	ENSDARP00000077013	ENSDARG00000013397	25	35321463	35341847	1
ENSORLP00000009538	ENSORLG00000007609	6	12095755	12098303	-1	ENSDARP00000011243	ENSDARG00000003216	25	35061366	35073848	1
ENSORLP00000009562	ENSORLG00000007629	6	12099774	12107138	-1	ENSDARP00000104472	ENSDARG00000086670	25	35019088	35055155	1
ENSORLP00000009581	ENSORLG00000007645	6	12115104	12123863	-1	ENSDARP00000106236	ENSDARG00000031768	25	34896334	35009721	1
ENSORLP00000009588	ENSORLG00000007653	6	12385126	12387093	-1	ENSDARP00000082020	ENSDARG00000061416	25	34254859	34256232	1
ENSORLP00000009759	ENSORLG00000007786	6	12424053	12476056	1	ENSDARP00000014065	ENSDARG00000044271	25	33989724	34104360	-1
ENSORLP00000009776	ENSORLG00000007803	6	12491143	12500436	1	ENSDARP00000002483	ENSDARG00000087402	25	33891838	33948478	-1
ENSORLP00000009787	ENSORLG00000007810	6	12502242	12505588	1	ENSDARP00000059799	ENSDARG00000040803	25	33875138	33885198	-1
ENSORLP00000009799	ENSORLG00000007820	6	12524398	12530761	1	ENSDARP00000111213	ENSDARG00000061532	25	33772457	33846011	-1
ENSORLP00000009832	ENSORLG00000007847	6	12532670	12538086	-1	ENSDARP00000064522	ENSDARG00000043944	25	33738159	33769414	1
ENSORLP00000009843	ENSORLG00000007859	6	12539869	12542347	1	ENSDARP00000020636	ENSDARG00000003971	25	33729182	33734544	-1
ENSORLP00000009926	ENSORLG00000007912	6	12544777	12595361	-1	ENSDARP00000035079	ENSDARG00000023104	25	33503547	33721636	1
Chain ID: 40	Score: 12.50	Medaka: chr13:10,722,811-11,717,582 (0.99 Mb)	Zebrafish: chr15:17,074,183-18,965,065 (1.89 Mb)
ENSORLP00000006416	ENSORLG00000005091	13	10722811	10732520	1	ENSDARP00000073184	ENSDARG00000025302	15	17074183	17098917	1
ENSORLP00000006453	ENSORLG00000005115	13	10737036	10740231	-1	ENSDARP00000127719	ENSDARG00000087717	15	17108080	17120299	-1
ENSORLP00000006460	ENSORLG00000005122	13	10756859	10773008	-1	ENSDARP00000128866	ENSDARG00000074526	15	17203687	17302903	-1
ENSORLP00000006465	ENSORLG00000005127	13	10809441	10820108	-1	ENSDARP00000021088	ENSDARG00000007220	15	17312846	17518111	-1
ENSORLP00000006502	ENSORLG00000005159	13	11031626	11084918	1	ENSDARP00000062602	ENSDARG00000042677	15	17764329	17887819	1
ENSORLP00000006522	ENSORLG00000005174	13	11164342	11176875	-1	ENSDARP00000117171	ENSDARG00000033845	15	18037515	18150716	-1
ENSORLP00000006545	ENSORLG00000005192	13	11259196	11264955	1	ENSDARP00000105236	ENSDARG00000086037	15	18201227	18216625	1
ENSORLP00000006560	ENSORLG00000005205	13	11268052	11274919	1	ENSDARP00000020396	ENSDARG00000015823	15	18225455	18230670	1
ENSORLP00000006563	ENSORLG00000005208	13	11277050	11278269	-1	ENSDARP00000062575	ENSDARG00000042659	15	18231779	18234688	-1
ENSORLP00000006575	ENSORLG00000005216	13	11279009	11285177	1	ENSDARP00000062568	ENSDARG00000042658	15	18236127	18248248	1
ENSORLP00000006612	ENSORLG00000005242	13	11286939	11297211	-1	ENSDARP00000098663	ENSDARG00000076639	15	18255112	18344059	-1
ENSORLP00000006748	ENSORLG00000005354	13	11510520	11522080	-1	ENSDARP00000104119	ENSDARG00000014137	15	18709010	18733623	-1
ENSORLP00000006764	ENSORLG00000005366	13	11541239	11544908	1	ENSDARP00000086992	ENSDARG00000063372	15	18745015	18755003	1
ENSORLP00000006790	ENSORLG00000005387	13	11655360	11670429	1	ENSDARP00000091978	ENSDARG00000058538	15	18800261	18836981	1
ENSORLP00000006824	ENSORLG00000005417	13	11683930	11688431	1	ENSDARP00000127860	ENSDARG00000023814	15	18850502	18855521	1
ENSORLP00000006835	ENSORLG00000005427	13	11692600	11695678	1	ENSDARP00000007187	ENSDARG00000020964	15	18862014	18870408	1
ENSORLP00000006840	ENSORLG00000005434	13	11696669	11701995	1	ENSDARP00000097751	ENSDARG00000074073	15	18877414	18887676	1
ENSORLP00000006851	ENSORLG00000005444	13	11714414	11717582	1	ENSDARP00000054427	ENSDARG00000037405	15	18952928	18965065	1
Chain ID: 41	Score: 12.25	Medaka: chr11:22,757,410-23,275,652 (0.52 Mb)	Zebrafish: chr19:32,650,136-33,862,670 (1.21 Mb)
ENSORLP00000015975	ENSORLG00000012754	11	22757410	22768850	1	ENSDARP00000072921	ENSDARG00000056034	19	32650136	32676425	1
ENSORLP00000016013	ENSORLG00000012788	11	22772661	22797094	-1	ENSDARP00000097799	ENSDARG00000056566	19	32683440	32767901	-1
ENSORLP00000016024	ENSORLG00000012799	11	22801290	22812688	1	ENSDARP00000114472	ENSDARG00000061723	19	32777735	32797074	1
ENSORLP00000016052	ENSORLG00000012815	11	22819624	22823967	-1	ENSDARP00000094388	ENSDARG00000035954	19	32814688	32821442	-1
ENSORLP00000016088	ENSORLG00000012846	11	22824744	22826329	1	ENSDARP00000117803	ENSDARG00000061728	19	32822316	32824711	1
ENSORLP00000016098	ENSORLG00000012852	11	22827823	22829294	-1	ENSDARP00000052182	ENSDARG00000093406	19	32825970	32828385	-1
ENSORLP00000016073	ENSORLG00000012834	11	22831732	22834803	1	ENSDARP00000052184	ENSDARG00000035957	19	32831358	32835946	1
ENSORLP00000016138	ENSORLG00000012880	11	22837824	22858640	-1	ENSDARP00000122491	ENSDARG00000061752	19	32839385	32900635	-1
ENSORLP00000016186	ENSORLG00000012917	11	22906161	22914734	-1	ENSDARP00000111087	ENSDARG00000020278	19	32991288	33008389	-1
ENSORLP00000016214	ENSORLG00000012936	11	22921485	22927749	1	ENSDARP00000112978	ENSDARG00000070537	19	33016903	33034905	1
ENSORLP00000016242	ENSORLG00000012961	11	23019938	23028313	1	ENSDARP00000126183	ENSDARG00000061713	19	33149919	33183677	1
ENSORLP00000016253	ENSORLG00000012970	11	23038953	23073471	-1	ENSDARP00000082791	ENSDARG00000061718	19	33201643	33286676	-1
ENSORLP00000016260	ENSORLG00000012976	11	23085423	23096772	-1	ENSDARP00000072730	ENSDARG00000055875	19	33296140	33319657	-1
ENSORLP00000016292	ENSORLG00000013003	11	23254984	23261973	1	ENSDARP00000082698	ENSDARG00000061687	19	33832438	33837060	1
ENSORLP00000016345	ENSORLG00000013044	11	23268726	23275652	-1	ENSDARP00000050129	ENSDARG00000016160	19	33850211	33862670	-1
Chain ID: 42	Score: 12.25	Medaka: chr4:28,486,957-29,746,786 (1.26 Mb)	Zebrafish: chr6:27,726,637-29,090,810 (1.36 Mb)
ENSORLP00000019410	ENSORLG00000015499	4	28486957	28496772	1	ENSDARP00000112480	ENSDARG00000056924	6	27726637	27756866	1
ENSORLP00000019484	ENSORLG00000015554	4	28501406	28522568	1	ENSDARP00000115391	ENSDARG00000044441	6	27760738	27819534	1
ENSORLP00000019495	ENSORLG00000015572	4	28526262	28528623	1	ENSDARP00000083628	ENSDARG00000062030	6	27832621	27833640	1
ENSORLP00000019511	ENSORLG00000015584	4	28529574	28544681	1	ENSDARP00000104271	ENSDARG00000074283	6	27849363	27900420	1
ENSORLP00000019520	ENSORLG00000015589	4	28554646	28557400	-1	ENSDARP00000107695	ENSDARG00000070864	6	27924812	27930760	-1
ENSORLP00000019533	ENSORLG00000015602	4	29311777	29424688	1	ENSDARP00000113831	ENSDARG00000023578	6	28142136	28400032	1
ENSORLP00000019542	ENSORLG00000015610	4	29469503	29496507	1	ENSDARP00000072909	ENSDARG00000056026	6	28467647	28503513	1
ENSORLP00000019616	ENSORLG00000015665	4	29535828	29560319	1	ENSDARP00000108362	ENSDARG00000044356	6	28571363	28626964	1
ENSORLP00000019631	ENSORLG00000015676	4	29560547	29566779	-1	ENSDARP00000101599	ENSDARG00000017886	6	28859052	28873515	-1
ENSORLP00000019644	ENSORLG00000015686	4	29650056	29654943	-1	ENSDARP00000073086	ENSDARG00000056178	6	28898340	28909357	-1
ENSORLP00000019655	ENSORLG00000015696	4	29670285	29679994	1	ENSDARP00000003281	ENSDARG00000013144	6	28931335	28940084	1
ENSORLP00000019661	ENSORLG00000015702	4	29681519	29688014	-1	ENSDARP00000073091	ENSDARG00000056193	6	28941348	29001685	-1
ENSORLP00000019671	ENSORLG00000015709	4	29701669	29704154	1	ENSDARP00000098456	ENSDARG00000034430	6	29002249	29006259	1
ENSORLP00000019674	ENSORLG00000015711	4	29710907	29714749	-1	ENSDARP00000081997	ENSDARG00000061409	6	29009377	29017665	-1
ENSORLP00000019717	ENSORLG00000015740	4	29718862	29746786	-1	ENSDARP00000073126	ENSDARG00000056259	6	29027800	29090810	-1
Chain ID: 43	Score: 12.00	Medaka: chr11:9,111,013-9,825,631 (0.71 Mb)	Zebrafish: chr19:41,310,870-42,471,431 (1.16 Mb)
ENSORLP00000005124	ENSORLG00000004092	11	9111013	9117983	1	ENSDARP00000081878	ENSDARG00000061365	19	41310870	41334254	1
ENSORLP00000005202	ENSORLG00000004156	11	9223500	9236952	-1	ENSDARP00000116046	ENSDARG00000028845	19	41678230	41745184	-1
ENSORLP00000005218	ENSORLG00000004168	11	9402100	9405457	-1	ENSDARP00000081855	ENSDARG00000061351	19	41809623	41815657	-1
ENSORLP00000005234	ENSORLG00000004180	11	9405794	9406155	1	ENSDARP00000051949	ENSDARG00000035798	19	41817475	41819656	1
ENSORLP00000005414	ENSORLG00000004319	11	9459577	9475255	1	ENSDARP00000118091	ENSDARG00000020007	19	41944025	41962093	1
ENSORLP00000005462	ENSORLG00000004357	11	9481105	9492430	1	ENSDARP00000114886	ENSDARG00000023900	19	41967725	41994611	1
ENSORLP00000005506	ENSORLG00000004392	11	9494352	9502784	-1	ENSDARP00000093582	ENSDARG00000012138	19	41999620	42030088	-1
ENSORLP00000005546	ENSORLG00000004418	11	9517001	9570618	1	ENSDARP00000123328	ENSDARG00000061304	19	42040866	42120606	1
ENSORLP00000005559	ENSORLG00000004430	11	9574189	9580882	1	ENSDARP00000048437	ENSDARG00000034988	19	42130737	42142739	1
ENSORLP00000005600	ENSORLG00000004460	11	9587080	9609274	-1	ENSDARP00000071589	ENSDARG00000054848	19	42152058	42174178	-1
ENSORLP00000005693	ENSORLG00000004529	11	9757683	9759697	-1	ENSDARP00000030382	ENSDARG00000027899	19	42373967	42376759	-1
ENSORLP00000005708	ENSORLG00000004542	11	9805515	9806998	1	ENSDARP00000093553	ENSDARG00000042291	19	42437214	42438500	1
ENSORLP00000005733	ENSORLG00000004561	11	9810545	9811901	-1	ENSDARP00000100492	ENSDARG00000042296	19	42442428	42443987	-1
ENSORLP00000005805	ENSORLG00000004615	11	9815641	9825631	1	ENSDARP00000081621	ENSDARG00000061268	19	42452120	42471431	1
Chain ID: 44	Score: 12.00	Medaka: chr13:12,433,013-13,212,803 (0.78 Mb)	Zebrafish: chr15:1,043,756-1,760,215 (0.72 Mb)
ENSORLP00000007491	ENSORLG00000005954	13	12433013	12445336	-1	ENSDARP00000087565	ENSDARG00000063621	15	1043756	1061924	-1
ENSORLP00000007506	ENSORLG00000005965	13	12466853	12478283	1	ENSDARP00000129272	ENSDARG00000077497	15	1085413	1099924	1
ENSORLP00000007515	ENSORLG00000005974	13	12492576	12493881	1	ENSDARP00000128926	ENSDARG00000069945	15	1115777	1116814	1
ENSORLP00000007530	ENSORLG00000005989	13	12502909	12504826	1	ENSDARP00000128832	ENSDARG00000069944	15	1133900	1137397	1
ENSORLP00000007569	ENSORLG00000006020	13	12508503	12514685	1	ENSDARP00000104367	ENSDARG00000076444	15	1196108	1209347	1
ENSORLP00000007599	ENSORLG00000006048	13	12763878	12800215	1	ENSDARP00000126728	ENSDARG00000035175	15	1367639	1428959	1
ENSORLP00000007634	ENSORLG00000006074	13	12852156	12915246	-1	ENSDARP00000116409	ENSDARG00000038879	15	1489879	1529079	-1
ENSORLP00000007690	ENSORLG00000006114	13	12899245	12911546	1	ENSDARP00000108838	ENSDARG00000038882	15	1530971	1568204	1
ENSORLP00000007825	ENSORLG00000006226	13	12919389	12929857	-1	ENSDARP00000106212	ENSDARG00000023190	15	1593482	1617561	-1
ENSORLP00000007854	ENSORLG00000006249	13	12936807	12945376	-1	ENSDARP00000109769	ENSDARG00000089641	15	1626434	1646716	-1
ENSORLP00000007886	ENSORLG00000006279	13	12979591	12990059	1	ENSDARP00000012858	ENSDARG00000015676	15	1649681	1667375	1
ENSORLP00000007892	ENSORLG00000006282	13	13005939	13007471	1	ENSDARP00000076378	ENSDARG00000058960	15	1700378	1705739	1
ENSORLP00000007918	ENSORLG00000006303	13	13111725	13118194	-1	ENSDARP00000013482	ENSDARG00000015968	15	1714415	1725893	-1
ENSORLP00000007951	ENSORLG00000006330	13	13134683	13204863	-1	ENSDARP00000076385	ENSDARG00000058994	15	1729632	1742169	-1
ENSORLP00000007989	ENSORLG00000006360	13	13206897	13212803	-1	ENSDARP00000087506	ENSDARG00000063596	15	1745303	1760215	-1
Chain ID: 45	Score: 12.00	Medaka: chr18:21,719,443-22,166,901 (0.45 Mb)	Zebrafish: chr7:52,366,784-53,204,522 (0.84 Mb)
ENSORLP00000011398	ENSORLG00000009086	18	21719443	21720502	-1	ENSDARP00000020125	ENSDARG00000015780	7	52366784	52369672	-1
ENSORLP00000011695	ENSORLG00000009315	18	21730350	21774515	-1	ENSDARP00000105937	ENSDARG00000052061	7	52378671	52557318	-1
ENSORLP00000011806	ENSORLG00000009416	18	21872658	21907341	1	ENSDARP00000068317	ENSDARG00000052063	7	52558596	52648383	1
ENSORLP00000011817	ENSORLG00000009429	18	21921039	21924639	-1	ENSDARP00000022483	ENSDARG00000052065	7	52700940	52704181	-1
ENSORLP00000011929	ENSORLG00000009512	18	21933264	21952645	-1	ENSDARP00000089419	ENSDARG00000018329	7	52724991	52749501	-1
ENSORLP00000011944	ENSORLG00000009522	18	21957629	21965542	-1	ENSDARP00000067646	ENSDARG00000046013	7	52770814	52775945	-1
ENSORLP00000011975	ENSORLG00000009550	18	21979705	21995089	1	ENSDARP00000099592	ENSDARG00000074367	7	52780107	52807889	1
ENSORLP00000011985	ENSORLG00000009559	18	22002837	22025498	-1	ENSDARP00000105080	ENSDARG00000059672	7	52820279	52916487	-1
ENSORLP00000011990	ENSORLG00000009563	18	22056155	22080608	-1	ENSDARP00000076899	ENSDARG00000089066	7	52927886	53001466	-1
ENSORLP00000012015	ENSORLG00000009584	18	22129868	22133614	-1	ENSDARP00000108089	ENSDARG00000014690	7	53089048	53094813	-1
ENSORLP00000012016	ENSORLG00000009588	18	22142374	22142727	-1	ENSDARP00000102688	ENSDARG00000077769	7	53098890	53099321	-1
ENSORLP00000012043	ENSORLG00000009606	18	22154121	22166901	-1	ENSDARP00000077625	ENSDARG00000003021	7	53111948	53204522	-1
Chain ID: 46	Score: 12.00	Medaka: chr4:15,659,607-15,906,568 (0.25 Mb)	Zebrafish: chr8:20,575,386-21,028,930 (0.45 Mb)
ENSORLP00000011241	ENSORLG00000008964	4	15659607	15661616	-1	ENSDARP00000036885	ENSDARG00000021959	8	21026608	21028930	1
ENSORLP00000011268	ENSORLG00000008986	4	15670868	15683553	-1	ENSDARP00000074070	ENSDARG00000026986	8	20993297	21009209	1
ENSORLP00000011321	ENSORLG00000009024	4	15689578	15696508	-1	ENSDARP00000019044	ENSDARG00000015164	8	20978328	20987100	1
ENSORLP00000011358	ENSORLG00000009055	4	15702615	15705486	-1	ENSDARP00000120338	ENSDARG00000019113	8	20956387	20964206	1
ENSORLP00000011416	ENSORLG00000009099	4	15709815	15716762	-1	ENSDARP00000006727	ENSDARG00000015752	8	20936536	20951841	1
ENSORLP00000011481	ENSORLG00000009150	4	15729630	15774755	1	ENSDARP00000099288	ENSDARG00000075188	8	20836831	20918561	-1
ENSORLP00000011525	ENSORLG00000009185	4	15784335	15795814	1	ENSDARP00000099768	ENSDARG00000078734	8	20788883	20817199	-1
ENSORLP00000011542	ENSORLG00000009204	4	15804741	15808651	1	ENSDARP00000120885	ENSDARG00000010347	8	20771032	20783793	-1
ENSORLP00000011573	ENSORLG00000009229	4	15816617	15826462	1	ENSDARP00000063399	ENSDARG00000043185	8	20735287	20768577	-1
ENSORLP00000011582	ENSORLG00000009239	4	15834893	15841774	-1	ENSDARP00000107734	ENSDARG00000004094	8	20695816	20728430	1
ENSORLP00000011608	ENSORLG00000009257	4	15861411	15879280	1	ENSDARP00000108057	ENSDARG00000013575	8	20612318	20644885	-1
ENSORLP00000011673	ENSORLG00000009305	4	15881959	15906568	-1	ENSDARP00000033648	ENSDARG00000015356	8	20575386	20608286	1
Chain ID: 47	Score: 12.00	Medaka: chr7:9,547,438-10,122,514 (0.58 Mb)	Zebrafish: chr23:28,961,881-30,062,572 (1.10 Mb)
ENSORLP00000006468	ENSORLG00000005130	7	9547438	9550787	1	ENSDARP00000072618	ENSDARG00000055760	23	28961881	28968035	1
ENSORLP00000006473	ENSORLG00000005136	7	9555872	9556515	1	ENSDARP00000047377	ENSDARG00000031649	23	28974385	28974860	1
ENSORLP00000006486	ENSORLG00000005148	7	9577177	9581497	-1	ENSDARP00000072629	ENSDARG00000055770	23	29046484	29051191	-1
ENSORLP00000006497	ENSORLG00000005154	7	9619684	9638063	1	ENSDARP00000113910	ENSDARG00000028322	23	29051894	29164982	1
ENSORLP00000006537	ENSORLG00000005188	7	9897380	9899727	1	ENSDARP00000128116	ENSDARG00000004452	23	29601107	29603560	1
ENSORLP00000006572	ENSORLG00000005212	7	9905772	9913325	-1	ENSDARP00000007588	ENSDARG00000015343	23	29624672	29637358	-1
ENSORLP00000006608	ENSORLG00000005238	7	9917639	9965544	-1	ENSDARP00000050914	ENSDARG00000037020	23	29641947	29745179	-1
ENSORLP00000006635	ENSORLG00000005259	7	9969279	9985751	-1	ENSDARP00000105688	ENSDARG00000037017	23	29751106	29796322	-1
ENSORLP00000006654	ENSORLG00000005277	7	9990504	9991471	-1	ENSDARP00000118064	ENSDARG00000091906	23	29798038	29799680	-1
ENSORLP00000006677	ENSORLG00000005295	7	9992389	9998141	-1	ENSDARP00000120270	ENSDARG00000055893	23	29804979	29810602	-1
ENSORLP00000006696	ENSORLG00000005311	7	10000368	10002161	1	ENSDARP00000072766	ENSDARG00000055899	23	29813279	29817121	1
ENSORLP00000006741	ENSORLG00000005346	7	10007382	10040286	-1	ENSDARP00000109493	ENSDARG00000031720	23	29826714	29910436	-1
ENSORLP00000006834	ENSORLG00000005422	7	10082597	10100249	-1	ENSDARP00000017757	ENSDARG00000003250	23	30001141	30053784	-1
ENSORLP00000006846	ENSORLG00000005438	7	10122128	10122514	-1	ENSDARP00000009395	ENSDARG00000008010	23	30061790	30062572	-1
Chain ID: 48	Score: 11.75	Medaka: chr13:14,933,458-15,986,945 (1.05 Mb)	Zebrafish: chr15:20,745,463-22,796,439 (2.05 Mb)
ENSORLP00000009359	ENSORLG00000007465	13	14933458	14967681	-1	ENSDARP00000084386	ENSDARG00000062315	15	20745463	20798365	-1
ENSORLP00000009372	ENSORLG00000007476	13	14970044	14976995	-1	ENSDARP00000128287	ENSDARG00000056835	15	20808301	20814467	-1
ENSORLP00000009381	ENSORLG00000007482	13	14987089	14989869	1	ENSDARP00000084408	ENSDARG00000062319	15	20824052	20832676	1
ENSORLP00000009385	ENSORLG00000007486	13	14991208	14992174	-1	ENSDARP00000119281	ENSDARG00000069375	15	20837450	20839344	-1
ENSORLP00000009407	ENSORLG00000007503	13	15062437	15069570	1	ENSDARP00000073959	ENSDARG00000056921	15	20975691	20986370	1
ENSORLP00000009440	ENSORLG00000007529	13	15210215	15217827	-1	ENSDARP00000123929	ENSDARG00000062359	15	21097706	21109222	-1
ENSORLP00000009458	ENSORLG00000007545	13	15293255	15298488	1	ENSDARP00000124635	ENSDARG00000056934	15	21273445	21286655	1
ENSORLP00000009490	ENSORLG00000007574	13	15357113	15358669	1	ENSDARP00000032799	ENSDARG00000024920	15	21400009	21403719	1
ENSORLP00000009500	ENSORLG00000007580	13	15391278	15400760	1	ENSDARP00000040541	ENSDARG00000030532	15	21410227	21498211	1
ENSORLP00000009517	ENSORLG00000007593	13	15641531	15809977	1	ENSDARP00000128785	ENSDARG00000026753	15	22220722	22541130	1
ENSORLP00000009540	ENSORLG00000007611	13	15823737	15850363	1	ENSDARP00000108901	ENSDARG00000009958	15	22561930	22617966	1
ENSORLP00000009555	ENSORLG00000007625	13	15856379	15867456	-1	ENSDARP00000104288	ENSDARG00000005368	15	22627036	22696183	-1
ENSORLP00000009565	ENSORLG00000007631	13	15915255	15916598	1	ENSDARP00000102151	ENSDARG00000074074	15	22710783	22712066	1
ENSORLP00000009576	ENSORLG00000007639	13	15924734	15925980	-1	ENSDARP00000073031	ENSDARG00000056134	15	22722799	22726158	-1
ENSORLP00000009606	ENSORLG00000007666	13	15935215	15965643	-1	ENSDARP00000095298	ENSDARG00000004537	15	22736937	22773598	-1
ENSORLP00000009655	ENSORLG00000007707	13	15971923	15986945	-1	ENSDARP00000059375	ENSDARG00000040571	15	22777321	22796439	-1
Chain ID: 49	Score: 11.75	Medaka: chr16:15,064,745-15,686,868 (0.62 Mb)	Zebrafish: chr16:24,111,674-26,048,203 (1.94 Mb)
ENSORLP00000011973	ENSORLG00000009548	16	15064745	15071368	1	ENSDARP00000103862	ENSDARG00000077615	16	24111674	24129115	1
ENSORLP00000012042	ENSORLG00000009604	16	15100311	15115262	-1	ENSDARP00000103591	ENSDARG00000079259	16	24375495	24459862	-1
ENSORLP00000012050	ENSORLG00000009610	16	15124856	15130059	-1	ENSDARP00000106803	ENSDARG00000007086	16	24469545	24474428	-1
ENSORLP00000012055	ENSORLG00000009615	16	15133298	15136500	-1	ENSDARP00000122362	ENSDARG00000078387	16	24476069	24483424	-1
ENSORLP00000012101	ENSORLG00000009652	16	15147810	15157628	-1	ENSDARP00000081578	ENSDARG00000061242	16	24546018	24565941	-1
ENSORLP00000012135	ENSORLG00000009675	16	15164303	15175864	-1	ENSDARP00000072463	ENSDARG00000055607	16	24705494	24739485	-1
ENSORLP00000012147	ENSORLG00000009685	16	15181259	15186504	1	ENSDARP00000108443	ENSDARG00000087956	16	24768468	24783484	1
ENSORLP00000012168	ENSORLG00000009700	16	15198655	15213585	1	ENSDARP00000041624	ENSDARG00000017790	16	24798914	24853624	1
ENSORLP00000012201	ENSORLG00000009724	16	15216528	15216925	-1	ENSDARP00000128381	ENSDARG00000055589	16	24862471	24863600	-1
ENSORLP00000012203	ENSORLG00000009727	16	15229857	15232226	-1	ENSDARP00000110994	ENSDARG00000011824	16	24933368	24951498	-1
ENSORLP00000012223	ENSORLG00000009745	16	15240797	15248464	-1	ENSDARP00000089171	ENSDARG00000075437	16	24964698	24994998	-1
ENSORLP00000012257	ENSORLG00000009769	16	15263146	15267329	1	ENSDARP00000094012	ENSDARG00000070390	16	25049392	25059338	1
ENSORLP00000012287	ENSORLG00000009792	16	15386406	15396431	1	ENSDARP00000107579	ENSDARG00000032485	16	25328171	25428294	1
ENSORLP00000012395	ENSORLG00000009879	16	15457949	15467817	-1	ENSDARP00000045890	ENSDARG00000012367	16	25592834	25618517	-1
ENSORLP00000012455	ENSORLG00000009926	16	15522308	15526543	1	ENSDARP00000011221	ENSDARG00000016977	16	25735003	25763347	1
ENSORLP00000012489	ENSORLG00000009955	16	15552052	15562652	1	ENSDARP00000115965	ENSDARG00000012389	16	25775202	25795936	1
ENSORLP00000012518	ENSORLG00000009976	16	15575674	15651938	1	ENSDARP00000122855	ENSDARG00000019753	16	25839334	25957928	1
ENSORLP00000012549	ENSORLG00000010000	16	15682215	15686868	1	ENSDARP00000046921	ENSDARG00000034771	16	26039434	26048203	1
Chain ID: 50	Score: 11.75	Medaka: chr18:19,021,231-19,316,853 (0.30 Mb)	Zebrafish: chr7:8,066,739-8,599,812 (0.53 Mb)
ENSORLP00000009886	ENSORLG00000007884	18	19021231	19039184	1	ENSDARP00000101586	ENSDARG00000077639	7	8544990	8599812	-1
ENSORLP00000009898	ENSORLG00000007893	18	19039986	19043747	-1	ENSDARP00000085532	ENSDARG00000062749	7	8530218	8540052	1
ENSORLP00000009932	ENSORLG00000007917	18	19044716	19050976	1	ENSDARP00000010437	ENSDARG00000011410	7	8511219	8525968	-1
ENSORLP00000009939	ENSORLG00000007926	18	19068970	19069860	1	ENSDARP00000085538	ENSDARG00000062752	7	8494124	8502722	-1
ENSORLP00000009959	ENSORLG00000007939	18	19074805	19099284	-1	ENSDARP00000108285	ENSDARG00000003269	7	8371384	8469149	1
ENSORLP00000009972	ENSORLG00000007951	18	19129062	19131749	-1	ENSDARP00000093404	ENSDARG00000070116	7	8323360	8335338	1
ENSORLP00000009983	ENSORLG00000007959	18	19133465	19138355	1	ENSDARP00000035261	ENSDARG00000025391	7	8306802	8321786	-1
ENSORLP00000009993	ENSORLG00000007968	18	19140375	19142464	1	ENSDARP00000103038	ENSDARG00000077583	7	8297610	8302643	-1
ENSORLP00000010004	ENSORLG00000007974	18	19163606	19166007	1	ENSDARP00000093395	ENSDARG00000070107	7	8232889	8248186	-1
ENSORLP00000010043	ENSORLG00000008004	18	19173399	19187044	1	ENSDARP00000024096	ENSDARG00000004658	7	8207888	8226368	-1
ENSORLP00000010049	ENSORLG00000008010	18	19203908	19217496	-1	ENSDARP00000093378	ENSDARG00000070100	7	8140745	8192751	1
ENSORLP00000010053	ENSORLG00000008014	18	19313451	19316853	-1	ENSDARP00000102615	ENSDARG00000073728	7	8066739	8070091	1
Chain ID: 51	Score: 11.75	Medaka: chr24:1,786,528-2,358,602 (0.57 Mb)	Zebrafish: chr20:44,517,520-45,974,695 (1.46 Mb)
ENSORLP00000012373	ENSORLG00000009862	24	1786528	1792714	1	ENSDARP00000062091	ENSDARG00000042344	20	45957032	45974695	-1
ENSORLP00000012389	ENSORLG00000009877	24	1796077	1797037	-1	ENSDARP00000101923	ENSDARG00000076500	20	45944248	45953951	1
ENSORLP00000012493	ENSORLG00000009957	24	1823460	1836143	1	ENSDARP00000107604	ENSDARG00000016011	20	45871788	45911553	-1
ENSORLP00000012536	ENSORLG00000009991	24	1839319	1844839	1	ENSDARP00000091063	ENSDARG00000069101	20	45839429	45863529	-1
ENSORLP00000012556	ENSORLG00000010006	24	1847448	1850406	-1	ENSDARP00000110440	ENSDARG00000076380	20	45816824	45829376	1
ENSORLP00000012581	ENSORLG00000010030	24	2112365	2214265	1	ENSDARP00000109305	ENSDARG00000087688	20	44997322	45374907	-1
ENSORLP00000012589	ENSORLG00000010036	24	2249445	2260055	-1	ENSDARP00000079851	ENSDARG00000060537	20	44788219	44990504	1
ENSORLP00000012600	ENSORLG00000010046	24	2269681	2285460	1	ENSDARP00000109540	ENSDARG00000087180	20	44772753	44780874	-1
ENSORLP00000012642	ENSORLG00000010081	24	2290606	2319445	1	ENSDARP00000123567	ENSDARG00000030263	20	44715385	44761573	-1
ENSORLP00000012648	ENSORLG00000010089	24	2322379	2325076	-1	ENSDARP00000011821	ENSDARG00000016528	20	44707152	44713851	1
ENSORLP00000012667	ENSORLG00000010102	24	2326719	2331840	1	ENSDARP00000021881	ENSDARG00000052625	20	44670732	44701913	-1
ENSORLP00000012706	ENSORLG00000010129	24	2334026	2342655	1	ENSDARP00000079877	ENSDARG00000060554	20	44579023	44663375	-1
ENSORLP00000012710	ENSORLG00000010136	24	2345257	2358602	-1	ENSDARP00000098720	ENSDARG00000079045	20	44517520	44552927	1
Chain ID: 52	Score: 11.50	Medaka: chr10:7,390,076-7,663,070 (0.27 Mb)	Zebrafish: chr14:31,438,636-31,957,447 (0.52 Mb)
ENSORLP00000002473	ENSORLG00000001990	10	7390076	7431806	1	ENSDARP00000016196	ENSDARG00000013075	14	31438636	31489854	1
ENSORLP00000002491	ENSORLG00000001999	10	7436826	7440509	-1	ENSDARP00000072616	ENSDARG00000055752	14	31508217	31512147	-1
ENSORLP00000002536	ENSORLG00000002032	10	7479137	7484459	-1	ENSDARP00000022333	ENSDARG00000016058	14	31583604	31593252	-1
ENSORLP00000002539	ENSORLG00000002035	10	7489549	7490136	1	ENSDARP00000118959	ENSDARG00000061543	14	31601736	31602338	1
ENSORLP00000002576	ENSORLG00000002065	10	7499007	7504190	1	ENSDARP00000115104	ENSDARG00000019636	14	31623697	31628625	1
ENSORLP00000002579	ENSORLG00000002068	10	7506724	7507218	1	ENSDARP00000112620	ENSDARG00000061548	14	31634664	31640496	1
ENSORLP00000002606	ENSORLG00000002092	10	7518578	7526318	1	ENSDARP00000012931	ENSDARG00000004270	14	31645950	31662531	1
ENSORLP00000002617	ENSORLG00000002103	10	7531849	7534755	1	ENSDARP00000023177	ENSDARG00000021124	14	31665293	31670074	1
ENSORLP00000002629	ENSORLG00000002112	10	7537633	7538805	-1	ENSDARP00000072648	ENSDARG00000055786	14	31673549	31674676	-1
ENSORLP00000002682	ENSORLG00000002159	10	7582296	7587799	-1	ENSDARP00000120146	ENSDARG00000021556	14	31725764	31745407	-1
ENSORLP00000002703	ENSORLG00000002176	10	7604140	7612969	-1	ENSDARP00000096631	ENSDARG00000071547	14	31792160	31814972	-1
ENSORLP00000002707	ENSORLG00000002178	10	7628876	7630205	-1	ENSDARP00000022612	ENSDARG00000015649	14	31848339	31852321	-1
ENSORLP00000002711	ENSORLG00000002183	10	7644771	7653531	-1	ENSDARP00000101753	ENSDARG00000016085	14	31863207	31929031	-1
ENSORLP00000002718	ENSORLG00000002188	10	7661246	7663070	-1	ENSDARP00000022497	ENSDARG00000012025	14	31952548	31957447	-1
Chain ID: 53	Score: 11.50	Medaka: chr17:27,959,719-28,362,881 (0.40 Mb)	Zebrafish: chr24:36,465,500-37,402,716 (0.94 Mb)
ENSORLP00000021797	ENSORLG00000017430	17	27959719	27971918	-1	ENSDARP00000066586	ENSDARG00000045275	24	37378236	37402716	1
ENSORLP00000021800	ENSORLG00000017435	17	28018991	28026596	1	ENSDARP00000096457	ENSDARG00000031015	24	37210495	37263978	-1
ENSORLP00000021810	ENSORLG00000017442	17	28036432	28046686	1	ENSDARP00000041380	ENSDARG00000028771	24	37176169	37195921	-1
ENSORLP00000021811	ENSORLG00000017445	17	28063523	28081325	1	ENSDARP00000104568	ENSDARG00000086681	24	37097133	37170747	-1
ENSORLP00000021814	ENSORLG00000017446	17	28086676	28088328	-1	ENSDARP00000112432	ENSDARG00000087303	24	37059446	37060288	1
ENSORLP00000021842	ENSORLG00000017467	17	28091343	28100008	1	ENSDARP00000058563	ENSDARG00000040041	24	37031734	37053750	-1
ENSORLP00000021847	ENSORLG00000017472	17	28106769	28107435	1	ENSDARP00000004795	ENSDARG00000028198	24	37018584	37028892	-1
ENSORLP00000021850	ENSORLG00000017475	17	28188045	28189144	-1	ENSDARP00000058570	ENSDARG00000040046	24	36882790	36886588	1
ENSORLP00000021863	ENSORLG00000017486	17	28220465	28251927	1	ENSDARP00000083042	ENSDARG00000061832	24	36727536	36777593	-1
ENSORLP00000021869	ENSORLG00000017490	17	28256991	28265693	-1	ENSDARP00000069627	ENSDARG00000053152	24	36690783	36711595	1
ENSORLP00000021882	ENSORLG00000017500	17	28277254	28294846	-1	ENSDARP00000105074	ENSDARG00000091410	24	36615702	36657091	1
ENSORLP00000021892	ENSORLG00000017508	17	28348200	28362881	-1	ENSDARP00000097746	ENSDARG00000076559	24	36465500	36498195	1
Chain ID: 54	Score: 11.50	Medaka: chr24:13,956,282-14,273,507 (0.32 Mb)	Zebrafish: chr23:31,619,293-32,157,484 (0.54 Mb)
ENSORLP00000020570	ENSORLG00000016430	24	13956282	13960468	-1	ENSDARP00000115551	ENSDARG00000076153	23	31619293	31634923	-1
ENSORLP00000020579	ENSORLG00000016436	24	13963357	13969028	1	ENSDARP00000053545	ENSDARG00000036878	23	31644274	31660680	1
ENSORLP00000020609	ENSORLG00000016460	24	13992774	13995620	1	ENSDARP00000053541	ENSDARG00000036875	23	31670736	31674473	1
ENSORLP00000020639	ENSORLG00000016484	24	13996400	14015711	-1	ENSDARP00000115424	ENSDARG00000012397	23	31678919	31745433	-1
ENSORLP00000020645	ENSORLG00000016491	24	14053279	14054213	-1	ENSDARP00000053538	ENSDARG00000036869	23	31793239	31794134	-1
ENSORLP00000020664	ENSORLG00000016505	24	14077664	14082749	1	ENSDARP00000053533	ENSDARG00000036868	23	31836109	31843274	1
ENSORLP00000020670	ENSORLG00000016511	24	14083186	14086771	-1	ENSDARP00000053530	ENSDARG00000036865	23	31847290	31871227	-1
ENSORLP00000020683	ENSORLG00000016520	24	14099734	14102646	-1	ENSDARP00000031762	ENSDARG00000025522	23	31879786	31884289	-1
ENSORLP00000020703	ENSORLG00000016537	24	14172378	14177788	-1	ENSDARP00000053398	ENSDARG00000036776	23	31991284	32002207	-1
ENSORLP00000020730	ENSORLG00000016559	24	14180244	14201064	-1	ENSDARP00000118572	ENSDARG00000036778	23	32007248	32048684	-1
ENSORLP00000020749	ENSORLG00000016573	24	14190190	14214404	1	ENSDARP00000070211	ENSDARG00000053666	23	32054172	32067401	1
ENSORLP00000020767	ENSORLG00000016588	24	14263772	14267684	-1	ENSDARP00000079489	ENSDARG00000060394	23	32140433	32151336	-1
ENSORLP00000020781	ENSORLG00000016600	24	14268851	14273507	1	ENSDARP00000116279	ENSDARG00000020887	23	32152752	32157484	1
Chain ID: 55	Score: 11.50	Medaka: chr5:7,067,090-7,712,022 (0.64 Mb)	Zebrafish: chr11:41,580,172-43,035,796 (1.46 Mb)
ENSORLP00000005026	ENSORLG00000004023	5	7067090	7072082	-1	ENSDARP00000109484	ENSDARG00000089489	11	41580172	41602788	-1
ENSORLP00000005043	ENSORLG00000004034	5	7078417	7079755	-1	ENSDARP00000052917	ENSDARG00000036428	11	41611171	41613668	-1
ENSORLP00000005049	ENSORLG00000004038	5	7091369	7097875	1	ENSDARP00000111747	ENSDARG00000086851	11	41624732	41644464	1
ENSORLP00000005074	ENSORLG00000004056	5	7137284	7146036	-1	ENSDARP00000080722	ENSDARG00000060900	11	41654072	41673278	-1
ENSORLP00000005099	ENSORLG00000004073	5	7204900	7213358	-1	ENSDARP00000093526	ENSDARG00000070165	11	41910114	41933153	-1
ENSORLP00000005209	ENSORLG00000004155	5	7258296	7269675	1	ENSDARP00000047615	ENSDARG00000026398	11	42025785	42081244	1
ENSORLP00000005222	ENSORLG00000004174	5	7275421	7283238	-1	ENSDARP00000113812	ENSDARG00000029795	11	42099110	42123182	-1
ENSORLP00000005259	ENSORLG00000004200	5	7289641	7295788	1	ENSDARP00000119495	ENSDARG00000004302	11	42127959	42149739	1
ENSORLP00000005292	ENSORLG00000004226	5	7319117	7327760	-1	ENSDARP00000016755	ENSDARG00000006341	11	42207676	42218581	-1
ENSORLP00000005309	ENSORLG00000004239	5	7369226	7370726	1	ENSDARP00000109854	ENSDARG00000070171	11	42316547	42320383	1
ENSORLP00000005364	ENSORLG00000004285	5	7476997	7489378	1	ENSDARP00000041530	ENSDARG00000034826	11	42557170	42571171	1
ENSORLP00000005422	ENSORLG00000004327	5	7541047	7581765	1	ENSDARP00000110643	ENSDARG00000087247	11	42638137	42796933	1
ENSORLP00000005497	ENSORLG00000004388	5	7657430	7662767	1	ENSDARP00000003850	ENSDARG00000016649	11	42944150	42951073	1
ENSORLP00000005519	ENSORLG00000004400	5	7663192	7670603	-1	ENSDARP00000002982	ENSDARG00000007130	11	42951572	42959248	-1
ENSORLP00000005538	ENSORLG00000004412	5	7673825	7712022	1	ENSDARP00000055710	ENSDARG00000019157	11	42964835	43035796	1
Chain ID: 56	Score: 11.50	Medaka: chr7:6,157,981-6,876,486 (0.72 Mb)	Zebrafish: chr8:26,746,458-27,279,457 (0.53 Mb)
ENSORLP00000003400	ENSORLG00000002728	7	6157981	6161435	1	ENSDARP00000072623	ENSDARG00000055763	8	26746458	26749962	1
ENSORLP00000003495	ENSORLG00000002802	7	6210385	6244646	1	ENSDARP00000062514	ENSDARG00000042616	8	26766808	26804042	1
ENSORLP00000003521	ENSORLG00000002824	7	6266302	6268863	-1	ENSDARP00000122045	ENSDARG00000061044	8	26826572	26830873	-1
ENSORLP00000003538	ENSORLG00000002833	7	6455061	6465495	1	ENSDARP00000058099	ENSDARG00000039754	8	26861116	26883654	1
ENSORLP00000003576	ENSORLG00000002861	7	6475326	6486116	1	ENSDARP00000011198	ENSDARG00000012848	8	26891275	26909745	1
ENSORLP00000003644	ENSORLG00000002914	7	6491616	6506836	1	ENSDARP00000024354	ENSDARG00000006900	8	26912787	26931460	1
ENSORLP00000003689	ENSORLG00000002952	7	6689266	6696155	1	ENSDARP00000113761	ENSDARG00000078571	8	27084981	27093357	1
ENSORLP00000003731	ENSORLG00000002987	7	6723032	6741466	1	ENSDARP00000123668	ENSDARG00000055835	8	27121657	27141032	1
ENSORLP00000003760	ENSORLG00000003012	7	6745948	6776220	1	ENSDARP00000053462	ENSDARG00000036820	8	27146808	27176167	1
ENSORLP00000003826	ENSORLG00000003063	7	6785259	6827725	1	ENSDARP00000048675	ENSDARG00000033184	8	27183614	27220927	1
ENSORLP00000003863	ENSORLG00000003099	7	6837440	6839715	1	ENSDARP00000114765	ENSDARG00000036818	8	27229708	27233984	1
ENSORLP00000003866	ENSORLG00000003105	7	6843125	6843770	-1	ENSDARP00000112708	ENSDARG00000092123	8	27236023	27239625	-1
ENSORLP00000003894	ENSORLG00000003127	7	6849967	6861025	1	ENSDARP00000081585	ENSDARG00000010862	8	27249627	27260968	1
ENSORLP00000004024	ENSORLG00000003221	7	6867549	6876486	1	ENSDARP00000053446	ENSDARG00000036811	8	27263482	27279457	1
Chain ID: 57	Score: 11.25	Medaka: chr15:23,405,045-23,803,719 (0.40 Mb)	Zebrafish: chr13:1,258,608-2,220,418 (0.96 Mb)
ENSORLP00000012220	ENSORLG00000009741	15	23405045	23411261	1	ENSDARP00000093542	ENSDARG00000011055	13	2207660	2220418	-1
ENSORLP00000012231	ENSORLG00000009752	15	23416889	23423030	-1	ENSDARP00000027516	ENSDARG00000004979	13	2178804	2196164	1
ENSORLP00000012296	ENSORLG00000009800	15	23428353	23437436	-1	ENSDARP00000017790	ENSDARG00000013095	13	2137910	2171788	1
ENSORLP00000012312	ENSORLG00000009811	15	23441769	23443757	-1	ENSDARP00000111671	ENSDARG00000039066	13	2122726	2127713	1
ENSORLP00000012323	ENSORLG00000009820	15	23445470	23450256	1	ENSDARP00000103646	ENSDARG00000079957	13	2095179	2116488	-1
ENSORLP00000012353	ENSORLG00000009846	15	23453973	23476028	1	ENSDARP00000028536	ENSDARG00000024979	13	2035124	2087873	-1
ENSORLP00000012366	ENSORLG00000009856	15	23529925	23533149	1	ENSDARP00000099572	ENSDARG00000078309	13	1854572	1883070	-1
ENSORLP00000012371	ENSORLG00000009860	15	23593089	23601953	1	ENSDARP00000029101	ENSDARG00000023722	13	1799707	1840163	-1
ENSORLP00000012399	ENSORLG00000009884	15	23614964	23625593	-1	ENSDARP00000105104	ENSDARG00000088740	13	1723943	1761061	1
ENSORLP00000012484	ENSORLG00000009951	15	23644417	23662793	-1	ENSDARP00000033176	ENSDARG00000025320	13	1675213	1719206	1
ENSORLP00000012626	ENSORLG00000010066	15	23694303	23780496	-1	ENSDARP00000087212	ENSDARG00000024748	13	1355889	1594370	1
ENSORLP00000012665	ENSORLG00000010100	15	23795365	23797314	1	ENSDARP00000049683	ENSDARG00000035005	13	1277399	1281033	-1
ENSORLP00000012683	ENSORLG00000010115	15	23802345	23803719	-1	ENSDARP00000002531	ENSDARG00000004151	13	1258608	1266942	1
Chain ID: 58	Score: 11.00	Medaka: chr14:11,472,842-12,367,262 (0.89 Mb)	Zebrafish: chr10:24,735,730-25,197,007 (0.46 Mb)
ENSORLP00000005785	ENSORLG00000004603	14	11472842	11474116	1	ENSDARP00000064462	ENSDARG00000043898	10	25193625	25197007	-1
ENSORLP00000005827	ENSORLG00000004633	14	11492446	11494380	1	ENSDARP00000124101	ENSDARG00000076121	10	25142068	25155584	-1
ENSORLP00000005864	ENSORLG00000004658	14	11495809	11502756	-1	ENSDARP00000074004	ENSDARG00000056985	10	25123272	25138721	1
ENSORLP00000005880	ENSORLG00000004672	14	11508756	11513685	-1	ENSDARP00000103048	ENSDARG00000075273	10	25114274	25117699	1
ENSORLP00000005916	ENSORLG00000004700	14	11516614	11522008	-1	ENSDARP00000074049	ENSDARG00000057021	10	25091421	25108063	1
ENSORLP00000005939	ENSORLG00000004718	14	11522789	11535153	1	ENSDARP00000106355	ENSDARG00000086302	10	25082046	25090541	-1
ENSORLP00000005958	ENSORLG00000004734	14	11540558	11548393	1	ENSDARP00000121180	ENSDARG00000057035	10	25072735	25079387	-1
ENSORLP00000006061	ENSORLG00000004815	14	11615224	11623265	-1	ENSDARP00000121637	ENSDARG00000016439	10	24900118	24924469	1
ENSORLP00000006101	ENSORLG00000004845	14	11632118	11643074	-1	ENSDARP00000084529	ENSDARG00000062361	10	24853292	24873187	1
ENSORLP00000006263	ENSORLG00000004967	14	12294900	12311257	1	ENSDARP00000064732	ENSDARG00000026403	10	24827959	24847532	-1
ENSORLP00000006326	ENSORLG00000005019	14	12318257	12331950	1	ENSDARP00000115460	ENSDARG00000061120	10	24805758	24822150	-1
ENSORLP00000006362	ENSORLG00000005047	14	12344064	12349426	1	ENSDARP00000003956	ENSDARG00000044091	10	24756796	24774709	-1
ENSORLP00000006382	ENSORLG00000005065	14	12357783	12367262	1	ENSDARP00000103261	ENSDARG00000078618	10	24735730	24748344	-1
Chain ID: 59	Score: 11.00	Medaka: chr18:14,809,945-15,150,407 (0.34 Mb)	Zebrafish: chr7:21,137,571-21,659,828 (0.52 Mb)
ENSORLP00000008336	ENSORLG00000006640	18	14809945	14815920	-1	ENSDARP00000091571	ENSDARG00000069331	7	21137571	21152699	-1
ENSORLP00000008358	ENSORLG00000006659	18	14827517	14830726	1	ENSDARP00000091581	ENSDARG00000069335	7	21176760	21184134	1
ENSORLP00000008388	ENSORLG00000006684	18	14839661	14846995	1	ENSDARP00000052903	ENSDARG00000055342	7	21199624	21209853	1
ENSORLP00000008435	ENSORLG00000006715	18	14851485	14871650	-1	ENSDARP00000112503	ENSDARG00000056346	7	21217081	21260419	-1
ENSORLP00000008443	ENSORLG00000006726	18	14879876	14884709	1	ENSDARP00000113970	ENSDARG00000069334	7	21267932	21298774	1
ENSORLP00000008450	ENSORLG00000006732	18	14894242	14911259	1	ENSDARP00000003269	ENSDARG00000036414	7	21305107	21379877	1
ENSORLP00000008509	ENSORLG00000006771	18	14982595	15014988	1	ENSDARP00000021237	ENSDARG00000056184	7	21418124	21450780	1
ENSORLP00000008568	ENSORLG00000006819	18	15016854	15030311	1	ENSDARP00000112163	ENSDARG00000016687	7	21456400	21489967	1
ENSORLP00000008577	ENSORLG00000006827	18	15037668	15038546	-1	ENSDARP00000105748	ENSDARG00000077414	7	21492964	21495613	-1
ENSORLP00000008608	ENSORLG00000006846	18	15065269	15085817	1	ENSDARP00000052905	ENSDARG00000036420	7	21551024	21580127	1
ENSORLP00000008631	ENSORLG00000006869	18	15096001	15109220	-1	ENSDARP00000052908	ENSDARG00000036422	7	21590796	21603978	-1
ENSORLP00000008674	ENSORLG00000006903	18	15139706	15150407	1	ENSDARP00000083119	ENSDARG00000061850	7	21633384	21659828	1
Chain ID: 60	Score: 11.00	Medaka: chr4:30,135,667-30,400,538 (0.26 Mb)	Zebrafish: chr6:37,390,312-37,945,756 (0.56 Mb)
ENSORLP00000019903	ENSORLG00000015893	4	30135667	30191749	-1	ENSDARP00000081745	ENSDARG00000061303	6	37813999	37945756	1
ENSORLP00000019930	ENSORLG00000015919	4	30247995	30249858	1	ENSDARP00000072786	ENSDARG00000055917	6	37694320	37697904	-1
ENSORLP00000019941	ENSORLG00000015929	4	30261811	30264242	1	ENSDARP00000072778	ENSDARG00000055912	6	37682319	37691795	-1
ENSORLP00000020018	ENSORLG00000015984	4	30264884	30289201	-1	ENSDARP00000095008	ENSDARG00000044345	6	37616889	37678597	1
ENSORLP00000020051	ENSORLG00000016018	4	30302621	30314051	-1	ENSDARP00000120432	ENSDARG00000077442	6	37574135	37599785	1
ENSORLP00000020054	ENSORLG00000016022	4	30314952	30316378	1	ENSDARP00000065118	ENSDARG00000044341	6	37569174	37570457	-1
ENSORLP00000020073	ENSORLG00000016036	4	30322791	30353744	-1	ENSDARP00000113673	ENSDARG00000076754	6	37477809	37547126	1
ENSORLP00000020082	ENSORLG00000016045	4	30358849	30362942	1	ENSDARP00000120363	ENSDARG00000044339	6	37463888	37474031	-1
ENSORLP00000020090	ENSORLG00000016052	4	30367940	30374899	1	ENSDARP00000120486	ENSDARG00000019614	6	37427632	37447905	-1
ENSORLP00000020101	ENSORLG00000016062	4	30380763	30387553	1	ENSDARP00000128208	ENSDARG00000088798	6	37409824	37417319	-1
ENSORLP00000020112	ENSORLG00000016071	4	30391303	30395850	1	ENSDARP00000127716	ENSDARG00000091465	6	37400021	37408107	-1
ENSORLP00000020117	ENSORLG00000016077	4	30395982	30400538	-1	ENSDARP00000128458	ENSDARG00000061091	6	37390312	37403074	1
Chain ID: 61	Score: 11.00	Medaka: chr5:9,106,214-9,834,532 (0.73 Mb)	Zebrafish: chr6:58,601,618-59,389,317 (0.79 Mb)
ENSORLP00000006584	ENSORLG00000005224	5	9106214	9114812	1	ENSDARP00000056137	ENSDARG00000038467	6	58601618	58631440	1
ENSORLP00000006589	ENSORLG00000005226	5	9119587	9130459	-1	ENSDARP00000129308	ENSDARG00000059824	6	58640276	58667313	-1
ENSORLP00000006686	ENSORLG00000005301	5	9154631	9216117	-1	ENSDARP00000085067	ENSDARG00000059818	6	58674850	58730754	-1
ENSORLP00000006750	ENSORLG00000005353	5	9217681	9228752	1	ENSDARP00000093918	ENSDARG00000031388	6	58734964	58769645	1
ENSORLP00000006754	ENSORLG00000005361	5	9236187	9237787	1	ENSDARP00000078063	ENSDARG00000059836	6	58820512	58821315	1
ENSORLP00000006811	ENSORLG00000005405	5	9238637	9254953	-1	ENSDARP00000123109	ENSDARG00000034396	6	58824105	58877566	-1
ENSORLP00000006839	ENSORLG00000005431	5	9269945	9303751	1	ENSDARP00000050139	ENSDARG00000013390	6	58911056	58957112	1
ENSORLP00000006934	ENSORLG00000005508	5	9692457	9692690	1	ENSDARP00000105484	ENSDARG00000086716	6	59051323	59082664	1
ENSORLP00000006970	ENSORLG00000005536	5	9700480	9716859	1	ENSDARP00000102802	ENSDARG00000068724	6	59094231	59148579	1
ENSORLP00000006977	ENSORLG00000005542	5	9726593	9732365	-1	ENSDARP00000110466	ENSDARG00000087907	6	59172912	59189026	-1
ENSORLP00000006980	ENSORLG00000005546	5	9761896	9773070	-1	ENSDARP00000069022	ENSDARG00000052638	6	59354835	59360578	-1
ENSORLP00000007002	ENSORLG00000005566	5	9779738	9834532	-1	ENSDARP00000100354	ENSDARG00000079860	6	59376441	59389317	-1
Chain ID: 62	Score: 10.75	Medaka: chr11:15,141,258-16,238,311 (1.10 Mb)	Zebrafish: chr19:6,674,349-7,894,750 (1.22 Mb)
ENSORLP00000008131	ENSORLG00000006476	11	15141258	15159183	1	ENSDARP00000015784	ENSDARG00000078954	19	7872368	7894750	-1
ENSORLP00000008190	ENSORLG00000006525	11	15190534	15227156	1	ENSDARP00000096532	ENSDARG00000012422	19	7803875	7847337	-1
ENSORLP00000008217	ENSORLG00000006546	11	15231491	15235603	-1	ENSDARP00000001459	ENSDARG00000001169	19	7796425	7802096	1
ENSORLP00000008239	ENSORLG00000006565	11	15241639	15245053	-1	ENSDARP00000038787	ENSDARG00000022280	19	7777145	7791830	1
ENSORLP00000008309	ENSORLG00000006618	11	15298761	15304611	-1	ENSDARP00000028924	ENSDARG00000036787	19	7746937	7753903	1
ENSORLP00000008342	ENSORLG00000006646	11	15306174	15308297	-1	ENSDARP00000001220	ENSDARG00000000656	19	7743224	7744721	1
ENSORLP00000008363	ENSORLG00000006662	11	15312611	15316232	-1	ENSDARP00000001845	ENSDARG00000031885	19	7737846	7741860	1
ENSORLP00000008611	ENSORLG00000006852	11	15468153	15471278	-1	ENSDARP00000024683	ENSDARG00000003251	19	7625593	7629233	1
ENSORLP00000008641	ENSORLG00000006878	11	15474058	15478365	-1	ENSDARP00000001263	ENSDARG00000001558	19	7614013	7622580	1
ENSORLP00000008720	ENSORLG00000006938	11	15494061	15499768	-1	ENSDARP00000000514	ENSDARG00000001710	19	7562560	7577836	1
ENSORLP00000008740	ENSORLG00000006958	11	15526000	15529861	1	ENSDARP00000109062	ENSDARG00000086931	19	7479024	7495542	-1
ENSORLP00000008762	ENSORLG00000006977	11	15540950	15545428	1	ENSDARP00000076009	ENSDARG00000040036	19	7456815	7462941	-1
ENSORLP00000008765	ENSORLG00000006981	11	15771683	15778168	1	ENSDARP00000087041	ENSDARG00000063390	19	7069796	7397291	-1
ENSORLP00000008843	ENSORLG00000007036	11	16005997	16027635	1	ENSDARP00000095720	ENSDARG00000018259	19	6952524	7007577	-1
ENSORLP00000008856	ENSORLG00000007050	11	16096659	16108245	1	ENSDARP00000118189	ENSDARG00000036816	19	6839775	6925075	-1
ENSORLP00000008901	ENSORLG00000007091	11	16185453	16220764	1	ENSDARP00000113238	ENSDARG00000071150	19	6710473	6750865	-1
ENSORLP00000008912	ENSORLG00000007102	11	16224594	16238311	1	ENSDARP00000049706	ENSDARG00000029501	19	6674349	6705982	-1
Chain ID: 63	Score: 10.75	Medaka: chr11:13,969,436-14,999,658 (1.03 Mb)	Zebrafish: chr19:10,084,408-11,054,670 (0.97 Mb)
ENSORLP00000007411	ENSORLG00000005893	11	13969436	13972172	1	ENSDARP00000075881	ENSDARG00000058557	19	11052346	11054670	-1
ENSORLP00000007419	ENSORLG00000005901	11	13976004	13980839	1	ENSDARP00000123248	ENSDARG00000020455	19	11038755	11047520	-1
ENSORLP00000007465	ENSORLG00000005937	11	13994381	14004871	-1	ENSDARP00000014272	ENSDARG00000020798	19	11018680	11029891	1
ENSORLP00000007479	ENSORLG00000005946	11	14023298	14027479	1	ENSDARP00000117457	ENSDARG00000070931	19	10979018	10990625	-1
ENSORLP00000007497	ENSORLG00000005960	11	14044475	14044871	-1	ENSDARP00000118611	ENSDARG00000093684	19	10954518	10954835	1
ENSORLP00000007501	ENSORLG00000005963	11	14048392	14051237	1	ENSDARP00000075906	ENSDARG00000058578	19	10948268	10953007	-1
ENSORLP00000007522	ENSORLG00000005982	11	14065591	14086997	1	ENSDARP00000025243	ENSDARG00000019842	19	10878036	10908725	-1
ENSORLP00000007535	ENSORLG00000005992	11	14128940	14143325	1	ENSDARP00000114015	ENSDARG00000063144	19	10842534	10858821	-1
ENSORLP00000007596	ENSORLG00000006043	11	14757575	14762077	-1	ENSDARP00000122169	ENSDARG00000036457	19	10413342	10420364	1
ENSORLP00000007618	ENSORLG00000006061	11	14782622	14791059	1	ENSDARP00000113063	ENSDARG00000062995	19	10354886	10370698	-1
ENSORLP00000007658	ENSORLG00000006093	11	14809067	14817034	1	ENSDARP00000120492	ENSDARG00000013295	19	10309758	10333891	-1
ENSORLP00000007710	ENSORLG00000006134	11	14862312	14884610	1	ENSDARP00000041093	ENSDARG00000062084	19	10235491	10285371	-1
ENSORLP00000007719	ENSORLG00000006141	11	14890835	14898431	-1	ENSDARP00000095378	ENSDARG00000070952	19	10155877	10225767	1
ENSORLP00000007762	ENSORLG00000006171	11	14977463	14987872	1	ENSDARP00000086048	ENSDARG00000062976	19	10104826	10125728	-1
ENSORLP00000007789	ENSORLG00000006193	11	14996119	14999658	1	ENSDARP00000045564	ENSDARG00000031283	19	10084408	10094887	-1
Chain ID: 64	Score: 10.75	Medaka: chr16:14,607,991-14,764,023 (0.16 Mb)	Zebrafish: chr16:28,761,351-29,069,485 (0.31 Mb)
ENSORLP00000011123	ENSORLG00000008866	16	14607991	14614174	1	ENSDARP00000101519	ENSDARG00000076308	16	29067926	29069485	-1
ENSORLP00000011151	ENSORLG00000008889	16	14635960	14643900	-1	ENSDARP00000042894	ENSDARG00000005112	16	29028278	29052954	1
ENSORLP00000011160	ENSORLG00000008896	16	14648797	14650307	-1	ENSDARP00000048035	ENSDARG00000029112	16	29017465	29019707	1
ENSORLP00000011190	ENSORLG00000008918	16	14655649	14668427	-1	ENSDARP00000113995	ENSDARG00000092134	16	28986678	29008014	1
ENSORLP00000011194	ENSORLG00000008923	16	14670684	14672172	1	ENSDARP00000120710	ENSDARG00000073918	16	28971952	28977816	-1
ENSORLP00000011219	ENSORLG00000008945	16	14673412	14679847	-1	ENSDARP00000115495	ENSDARG00000075824	16	28931292	28968222	1
ENSORLP00000011258	ENSORLG00000008976	16	14689599	14697593	1	ENSDARP00000094207	ENSDARG00000011245	16	28897744	28927242	-1
ENSORLP00000011276	ENSORLG00000008994	16	14708369	14717877	-1	ENSDARP00000124276	ENSDARG00000061398	16	28863185	28885594	1
ENSORLP00000011328	ENSORLG00000009033	16	14720036	14732786	-1	ENSDARP00000118507	ENSDARG00000055784	16	28806689	28850275	1
ENSORLP00000011360	ENSORLG00000009059	16	14741342	14745167	1	ENSDARP00000021458	ENSDARG00000006598	16	28781733	28787806	-1
ENSORLP00000011418	ENSORLG00000009102	16	14750967	14764023	1	ENSDARP00000101801	ENSDARG00000074346	16	28761351	28776676	-1
Chain ID: 65	Score: 10.75	Medaka: chr4:33,017,361-33,806,552 (0.79 Mb)	Zebrafish: chr8:15,786,461-17,193,964 (1.41 Mb)
ENSORLP00000021401	ENSORLG00000017101	4	33017361	33023648	1	ENSDARP00000023515	ENSDARG00000018953	8	15786461	15793286	1
ENSORLP00000021404	ENSORLG00000017105	4	33038219	33040063	1	ENSDARP00000117319	ENSDARG00000057648	8	15794825	15802983	1
ENSORLP00000021408	ENSORLG00000017108	4	33068138	33114060	-1	ENSDARP00000113955	ENSDARG00000068050	8	15828240	16510926	-1
ENSORLP00000021412	ENSORLG00000017112	4	33176786	33189472	-1	ENSDARP00000100225	ENSDARG00000075624	8	16020966	16037550	-1
ENSORLP00000021432	ENSORLG00000017130	4	33440313	33524337	1	ENSDARP00000116684	ENSDARG00000045639	8	16524037	16631693	1
ENSORLP00000021443	ENSORLG00000017140	4	33618603	33678500	-1	ENSDARP00000104417	ENSDARG00000022418	8	16794817	16925636	-1
ENSORLP00000021449	ENSORLG00000017144	4	33683091	33685353	1	ENSDARP00000117529	ENSDARG00000057610	8	16928296	16930897	1
ENSORLP00000021452	ENSORLG00000017146	4	33689383	33705417	-1	ENSDARP00000089462	ENSDARG00000040635	8	16944927	16983425	-1
ENSORLP00000021481	ENSORLG00000017166	4	33736805	33756218	-1	ENSDARP00000089463	ENSDARG00000078216	8	17039089	17078581	-1
ENSORLP00000021484	ENSORLG00000017171	4	33757657	33761093	-1	ENSDARP00000092429	ENSDARG00000076290	8	17102892	17111785	-1
ENSORLP00000021489	ENSORLG00000017174	4	33764181	33766156	-1	ENSDARP00000093332	ENSDARG00000079308	8	17117356	17128297	-1
ENSORLP00000021534	ENSORLG00000017202	4	33774594	33806552	-1	ENSDARP00000091500	ENSDARG00000069298	8	17136254	17193964	-1
Chain ID: 66	Score: 10.75	Medaka: chr7:10,167,566-10,627,365 (0.46 Mb)	Zebrafish: chr23:22,791,835-23,695,173 (0.90 Mb)
ENSORLP00000006865	ENSORLG00000005453	7	10167566	10168704	1	ENSDARP00000073394	ENSDARG00000056438	23	23693973	23695173	-1
ENSORLP00000006877	ENSORLG00000005463	7	10234882	10244696	-1	ENSDARP00000105625	ENSDARG00000087844	23	23526355	23546527	1
ENSORLP00000006955	ENSORLG00000005525	7	10255880	10263121	-1	ENSDARP00000119330	ENSDARG00000037324	23	23484279	23506609	1
ENSORLP00000007000	ENSORLG00000005561	7	10265653	10284716	1	ENSDARP00000086095	ENSDARG00000001754	23	23420842	23473488	-1
ENSORLP00000007005	ENSORLG00000005568	7	10286893	10320890	-1	ENSDARP00000112558	ENSDARG00000077852	23	23315048	23416557	1
ENSORLP00000007033	ENSORLG00000005593	7	10411097	10498868	-1	ENSDARP00000102789	ENSDARG00000077353	23	23114113	23220637	1
ENSORLP00000007068	ENSORLG00000005625	7	10558534	10564944	-1	ENSDARP00000003738	ENSDARG00000022456	23	22952852	22971584	1
ENSORLP00000007106	ENSORLG00000005650	7	10573035	10577589	1	ENSDARP00000073464	ENSDARG00000056499	23	22929290	22944653	-1
ENSORLP00000007185	ENSORLG00000005714	7	10577983	10585867	-1	ENSDARP00000113142	ENSDARG00000077875	23	22910257	22926742	1
ENSORLP00000007200	ENSORLG00000005728	7	10591848	10601823	-1	ENSDARP00000054336	ENSDARG00000034975	23	22891932	22899316	1
ENSORLP00000007206	ENSORLG00000005733	7	10625058	10627365	1	ENSDARP00000073475	ENSDARG00000056515	23	22791835	22802118	-1
Chain ID: 67	Score: 10.75	Medaka: chr9:13,658,055-14,667,751 (1.01 Mb)	Zebrafish: chr5:47,506,898-50,042,845 (2.54 Mb)
ENSORLP00000011743	ENSORLG00000009364	9	13658055	13663813	1	ENSDARP00000112656	ENSDARG00000059963	5	47506898	47525564	1
ENSORLP00000011763	ENSORLG00000009384	9	13667591	13671700	1	ENSDARP00000033575	ENSDARG00000025866	5	47527262	47549388	1
ENSORLP00000011788	ENSORLG00000009402	9	13671022	13676056	-1	ENSDARP00000121737	ENSDARG00000059982	5	47549871	47566916	-1
ENSORLP00000011850	ENSORLG00000009453	9	13714125	13733905	1	ENSDARP00000078459	ENSDARG00000059997	5	47601153	47677665	1
ENSORLP00000012239	ENSORLG00000009749	9	13742011	13771996	1	ENSDARP00000122218	ENSDARG00000060010	5	47689047	47803880	1
ENSORLP00000012243	ENSORLG00000009760	9	13758433	13759293	-1	ENSDARP00000108581	ENSDARG00000090524	5	47758616	47763071	-1
ENSORLP00000012252	ENSORLG00000009766	9	13773407	13775175	1	ENSDARP00000078547	ENSDARG00000060012	5	47807321	47809141	1
ENSORLP00000012319	ENSORLG00000009816	9	13787860	13816216	-1	ENSDARP00000074483	ENSDARG00000057395	5	47818124	47885009	-1
ENSORLP00000012392	ENSORLG00000009876	9	13976898	14028309	1	ENSDARP00000089906	ENSDARG00000078680	5	48034883	48096921	1
ENSORLP00000012418	ENSORLG00000009900	9	14104724	14197194	-1	ENSDARP00000120470	ENSDARG00000093413	5	48273390	48507648	-1
ENSORLP00000012430	ENSORLG00000009910	9	14451352	14452674	1	ENSDARP00000069896	ENSDARG00000053382	5	48696875	48698142	1
ENSORLP00000012528	ENSORLG00000009984	9	14513754	14517680	-1	ENSDARP00000004735	ENSDARG00000007657	5	49746896	49757840	-1
ENSORLP00000012598	ENSORLG00000010044	9	14558622	14572479	-1	ENSDARP00000072863	ENSDARG00000055989	5	49812626	49853377	-1
ENSORLP00000012616	ENSORLG00000010062	9	14633397	14667751	-1	ENSDARP00000044082	ENSDARG00000009418	5	49966176	50042845	-1
Chain ID: 68	Score: 10.50	Medaka: chr23:14,541,727-15,342,371 (0.80 Mb)	Zebrafish: chr4:14,022,992-15,177,395 (1.15 Mb)
ENSORLP00000017961	ENSORLG00000014324	23	14541727	14544973	1	ENSDARP00000007865	ENSDARG00000004497	4	14022992	14033357	1
ENSORLP00000018001	ENSORLG00000014357	23	14548438	14555684	1	ENSDARP00000013486	ENSDARG00000002952	4	14037269	14042224	1
ENSORLP00000018028	ENSORLG00000014382	23	14558536	14565143	1	ENSDARP00000067045	ENSDARG00000045601	4	14047287	14056044	1
ENSORLP00000018042	ENSORLG00000014394	23	14566813	14571919	-1	ENSDARP00000067047	ENSDARG00000007764	4	14058737	14069098	-1
ENSORLP00000018057	ENSORLG00000014409	23	14573705	14576572	1	ENSDARP00000085270	ENSDARG00000062651	4	14071651	14075630	1
ENSORLP00000018079	ENSORLG00000014428	23	14589486	14593441	1	ENSDARP00000107407	ENSDARG00000000019	4	14076852	14123181	1
ENSORLP00000018103	ENSORLG00000014451	23	14613179	14622457	-1	ENSDARP00000000019	ENSDARG00000000018	4	14148123	14166937	-1
ENSORLP00000018211	ENSORLG00000014529	23	15070425	15206844	1	ENSDARP00000020340	ENSDARG00000004336	4	14671236	14881802	1
ENSORLP00000018241	ENSORLG00000014552	23	15294959	15295120	1	ENSDARP00000092348	ENSDARG00000089640	4	15033965	15039894	1
ENSORLP00000018243	ENSORLG00000014555	23	15300487	15300957	1	ENSDARP00000107038	ENSDARG00000087241	4	15046488	15046931	1
ENSORLP00000018263	ENSORLG00000014567	23	15303320	15311829	1	ENSDARP00000043659	ENSDARG00000034823	4	15049036	15061331	1
ENSORLP00000018276	ENSORLG00000014578	23	15312278	15315572	-1	ENSDARP00000041069	ENSDARG00000032319	4	15061893	15066441	-1
ENSORLP00000018317	ENSORLG00000014610	23	15319479	15342371	-1	ENSDARP00000072130	ENSDARG00000012684	4	15144089	15177395	-1
Chain ID: 69	Score: 10.50	Medaka: chr5:970,842-1,374,107 (0.40 Mb)	Zebrafish: chr6:41,486,570-42,306,838 (0.82 Mb)
ENSORLP00000000865	ENSORLG00000000702	5	970842	1017204	1	ENSDARP00000079269	ENSDARG00000060309	6	41486570	41686617	1
ENSORLP00000000882	ENSORLG00000000716	5	1033710	1067294	1	ENSDARP00000035402	ENSDARG00000027938	6	41739670	41799519	1
ENSORLP00000000885	ENSORLG00000000719	5	1143553	1150698	1	ENSDARP00000050113	ENSDARG00000033956	6	41888144	41905069	1
ENSORLP00000000896	ENSORLG00000000729	5	1158502	1160530	-1	ENSDARP00000034317	ENSDARG00000024141	6	41927249	41934399	-1
ENSORLP00000000903	ENSORLG00000000736	5	1170453	1171739	-1	ENSDARP00000129191	ENSDARG00000003900	6	41963435	41964712	-1
ENSORLP00000000924	ENSORLG00000000752	5	1173716	1179696	-1	ENSDARP00000026625	ENSDARG00000003961	6	41970008	41977712	-1
ENSORLP00000000937	ENSORLG00000000763	5	1186440	1217263	-1	ENSDARP00000079907	ENSDARG00000004150	6	41982782	42043021	-1
ENSORLP00000000942	ENSORLG00000000768	5	1244891	1331873	-1	ENSDARP00000064968	ENSDARG00000092154	6	42077702	42221373	-1
ENSORLP00000001008	ENSORLG00000000823	5	1355032	1355827	1	ENSDARP00000011398	ENSDARG00000006207	6	42269906	42272379	1
ENSORLP00000001238	ENSORLG00000000994	5	1357553	1368912	-1	ENSDARP00000039867	ENSDARG00000014770	6	42278052	42300392	-1
ENSORLP00000001274	ENSORLG00000001033	5	1370227	1374107	-1	ENSDARP00000106382	ENSDARG00000020607	6	42303054	42306838	-1
Chain ID: 70	Score: 10.25	Medaka: chr16:26,344,491-26,952,896 (0.61 Mb)	Zebrafish: chr16:48,402,011-49,390,340 (0.99 Mb)
ENSORLP00000020247	ENSORLG00000016180	16	26344491	26352357	1	ENSDARP00000120160	ENSDARG00000073893	16	48402011	48419382	1
ENSORLP00000020267	ENSORLG00000016196	16	26358136	26372441	-1	ENSDARP00000107084	ENSDARG00000007727	16	48428576	48480573	-1
ENSORLP00000020274	ENSORLG00000016201	16	26397176	26406859	1	ENSDARP00000074509	ENSDARG00000057439	16	48489668	48507812	1
ENSORLP00000020321	ENSORLG00000016229	16	26559346	26596163	1	ENSDARP00000087797	ENSDARG00000069765	16	48587922	48753096	1
ENSORLP00000020330	ENSORLG00000016239	16	26622559	26641719	1	ENSDARP00000060808	ENSDARG00000041481	16	48757798	48798134	1
ENSORLP00000020335	ENSORLG00000016244	16	26655345	26672294	1	ENSDARP00000060813	ENSDARG00000041483	16	48820172	48846443	1
ENSORLP00000020338	ENSORLG00000016246	16	26680368	26691330	-1	ENSDARP00000106635	ENSDARG00000004586	16	48861244	48918804	-1
ENSORLP00000020359	ENSORLG00000016263	16	26763199	26767931	1	ENSDARP00000026575	ENSDARG00000016516	16	48986308	48993798	1
ENSORLP00000020382	ENSORLG00000016284	16	26818281	26834648	1	ENSDARP00000092529	ENSDARG00000069755	16	49065324	49145703	1
ENSORLP00000020399	ENSORLG00000016295	16	26857489	26879021	1	ENSDARP00000078354	ENSDARG00000059945	16	49213053	49260428	1
ENSORLP00000020400	ENSORLG00000016299	16	26892599	26893009	1	ENSDARP00000058384	ENSDARG00000039915	16	49273205	49273573	1
ENSORLP00000020428	ENSORLG00000016315	16	26934074	26952896	1	ENSDARP00000040768	ENSDARG00000033172	16	49359241	49390340	1
Chain ID: 71	Score: 10.25	Medaka: chr22:8,763,390-9,094,508 (0.33 Mb)	Zebrafish: chr17:26,723,896-27,278,032 (0.55 Mb)
ENSORLP00000017958	ENSORLG00000014323	22	8763390	8768540	1	ENSDARP00000107692	ENSDARG00000014498	17	27267810	27278032	-1
ENSORLP00000017971	ENSORLG00000014331	22	8792573	8838662	1	ENSDARP00000072074	ENSDARG00000055270	17	27181748	27241699	-1
ENSORLP00000017983	ENSORLG00000014343	22	8863654	8864163	1	ENSDARP00000071555	ENSDARG00000054823	17	27114409	27114858	-1
ENSORLP00000017999	ENSORLG00000014356	22	8872713	8882735	1	ENSDARP00000100111	ENSDARG00000079233	17	27086135	27107187	-1
ENSORLP00000018037	ENSORLG00000014389	22	8888564	8911283	1	ENSDARP00000105792	ENSDARG00000021896	17	27033273	27077213	-1
ENSORLP00000018054	ENSORLG00000014406	22	8924020	8934805	-1	ENSDARP00000044377	ENSDARG00000033437	17	26982617	27010746	1
ENSORLP00000018087	ENSORLG00000014435	22	8973555	9004198	1	ENSDARP00000050017	ENSDARG00000032932	17	26832310	26890122	-1
ENSORLP00000018092	ENSORLG00000014440	22	9007268	9007993	-1	ENSDARP00000128288	ENSDARG00000089553	17	26826324	26826998	1
ENSORLP00000018095	ENSORLG00000014445	22	9011683	9014525	-1	ENSDARP00000097661	ENSDARG00000078552	17	26807135	26817982	1
ENSORLP00000018127	ENSORLG00000014463	22	9037904	9041694	1	ENSDARP00000122905	ENSDARG00000021147	17	26771454	26776889	-1
ENSORLP00000018144	ENSORLG00000014477	22	9088753	9094508	1	ENSDARP00000050201	ENSDARG00000032623	17	26723896	26766033	-1
Chain ID: 72	Score: 10.25	Medaka: chr4:512,910-805,859 (0.29 Mb)	Zebrafish: chr20:23,149,146-23,644,008 (0.49 Mb)
ENSORLP00000000195	ENSORLG00000000158	4	512910	533980	-1	ENSDARP00000103183	ENSDARG00000052343	20	23149146	23158667	-1
ENSORLP00000000208	ENSORLG00000000171	4	555183	561682	1	ENSDARP00000068661	ENSDARG00000052341	20	23161245	23169159	1
ENSORLP00000000220	ENSORLG00000000179	4	576284	583142	-1	ENSDARP00000114939	ENSDARG00000092394	20	23193647	23213966	-1
ENSORLP00000000225	ENSORLG00000000187	4	590527	597324	1	ENSDARP00000068656	ENSDARG00000052336	20	23226377	23230090	1
ENSORLP00000000301	ENSORLG00000000234	4	632911	691432	1	ENSDARP00000115658	ENSDARG00000040001	20	23302755	23408289	1
ENSORLP00000000308	ENSORLG00000000251	4	692382	693606	-1	ENSDARP00000022641	ENSDARG00000019706	20	23411517	23413839	-1
ENSORLP00000000315	ENSORLG00000000255	4	693850	695272	-1	ENSDARP00000019940	ENSDARG00000009131	20	23419226	23426429	-1
ENSORLP00000000319	ENSORLG00000000260	4	700684	706339	-1	ENSDARP00000108359	ENSDARG00000032114	20	23435330	23459629	-1
ENSORLP00000000390	ENSORLG00000000318	4	717704	723525	-1	ENSDARP00000040775	ENSDARG00000032237	20	23463040	23481764	-1
ENSORLP00000000418	ENSORLG00000000345	4	771333	802515	1	ENSDARP00000124534	ENSDARG00000040009	20	23489048	23635126	1
ENSORLP00000000440	ENSORLG00000000359	4	803441	805859	-1	ENSDARP00000010074	ENSDARG00000009074	20	23638881	23644008	-1
Chain ID: 73	Score: 10.25	Medaka: chr8:6,694,477-6,996,958 (0.30 Mb)	Zebrafish: chr3:36,832,716-37,737,087 (0.90 Mb)
ENSORLP00000005336	ENSORLG00000004263	8	6694477	6695930	-1	ENSDARP00000055236	ENSDARG00000037895	3	36832716	36841242	-1
ENSORLP00000005370	ENSORLG00000004289	8	6701688	6711469	1	ENSDARP00000124899	ENSDARG00000037894	3	36856972	36885971	1
ENSORLP00000005500	ENSORLG00000004387	8	6716579	6727589	-1	ENSDARP00000129322	ENSDARG00000074524	3	36898823	36939426	-1
ENSORLP00000005525	ENSORLG00000004406	8	6741734	6768189	1	ENSDARP00000126333	ENSDARG00000070174	3	36967368	37046128	1
ENSORLP00000005556	ENSORLG00000004426	8	6770946	6777009	-1	ENSDARP00000016775	ENSDARG00000015610	3	37055593	37077282	-1
ENSORLP00000005571	ENSORLG00000004441	8	6778283	6782394	1	ENSDARP00000105943	ENSDARG00000059804	3	37078708	37098678	1
ENSORLP00000005602	ENSORLG00000004465	8	6784467	6786713	1	ENSDARP00000055227	ENSDARG00000037892	3	37107585	37130142	1
ENSORLP00000005624	ENSORLG00000004479	8	6788213	6790736	-1	ENSDARP00000126347	ENSDARG00000037891	3	37131651	37143348	-1
ENSORLP00000005641	ENSORLG00000004491	8	6797102	6810389	1	ENSDARP00000077930	ENSDARG00000055713	3	37193142	37228072	1
ENSORLP00000005695	ENSORLG00000004531	8	6940319	6942565	1	ENSDARP00000055224	ENSDARG00000037889	3	37569736	37575595	1
ENSORLP00000005702	ENSORLG00000004536	8	6952842	6955042	1	ENSDARP00000069524	ENSDARG00000053070	3	37644375	37654955	1
ENSORLP00000005737	ENSORLG00000004565	8	6994963	6996958	1	ENSDARP00000125811	ENSDARG00000074060	3	37720149	37737087	1
Chain ID: 74	Score: 10.25	Medaka: chr9:25,877,575-26,936,810 (1.06 Mb)	Zebrafish: chr5:28,530,391-29,914,991 (1.38 Mb)
ENSORLP00000020076	ENSORLG00000016038	9	25877575	25889408	-1	ENSDARP00000082118	ENSDARG00000061468	5	29904713	29914991	1
ENSORLP00000020091	ENSORLG00000016053	9	26044054	26061109	1	ENSDARP00000051514	ENSDARG00000035532	5	29779863	29794054	-1
ENSORLP00000020100	ENSORLG00000016060	9	26086173	26108364	1	ENSDARP00000042001	ENSDARG00000002771	5	29693121	29753489	-1
ENSORLP00000020105	ENSORLG00000016067	9	26116109	26120711	-1	ENSDARP00000073125	ENSDARG00000056211	5	29686649	29691902	1
ENSORLP00000020174	ENSORLG00000016121	9	26150166	26172537	1	ENSDARP00000121481	ENSDARG00000014962	5	29569578	29638521	-1
ENSORLP00000020216	ENSORLG00000016155	9	26181990	26191317	-1	ENSDARP00000089375	ENSDARG00000035514	5	29542882	29563968	1
ENSORLP00000020219	ENSORLG00000016159	9	26223483	26223803	1	ENSDARP00000098558	ENSDARG00000079497	5	29511751	29512053	-1
ENSORLP00000020243	ENSORLG00000016179	9	26538738	26552322	-1	ENSDARP00000051490	ENSDARG00000035521	5	29170240	29182822	1
ENSORLP00000020272	ENSORLG00000016197	9	26618635	26653186	-1	ENSDARP00000118755	ENSDARG00000044074	5	29086822	29131192	1
ENSORLP00000020286	ENSORLG00000016210	9	26674447	26679550	-1	ENSDARP00000120020	ENSDARG00000056281	5	29066426	29073478	1
ENSORLP00000020293	ENSORLG00000016219	9	26690624	26699909	-1	ENSDARP00000012354	ENSDARG00000004392	5	29049568	29059313	1
ENSORLP00000020373	ENSORLG00000016270	9	26713222	26831890	-1	ENSDARP00000082290	ENSDARG00000061541	5	28911804	29042161	1
ENSORLP00000020379	ENSORLG00000016282	9	26919819	26922367	-1	ENSDARP00000051482	ENSDARG00000035515	5	28565804	28570908	1
ENSORLP00000020395	ENSORLG00000016292	9	26923858	26936810	1	ENSDARP00000109699	ENSDARG00000088663	5	28530391	28537838	-1
Chain ID: 75	Score: 10.00	Medaka: chr10:6,398,958-6,909,050 (0.51 Mb)	Zebrafish: chr14:32,591,345-33,500,892 (0.91 Mb)
ENSORLP00000001979	ENSORLG00000001595	10	6398958	6432767	1	ENSDARP00000052937	ENSDARG00000036442	14	33382642	33500892	-1
ENSORLP00000002014	ENSORLG00000001623	10	6446342	6460616	1	ENSDARP00000029313	ENSDARG00000022895	14	33314558	33372869	-1
ENSORLP00000002038	ENSORLG00000001641	10	6734277	6737293	-1	ENSDARP00000096538	ENSDARG00000071496	14	32892196	32895178	1
ENSORLP00000002053	ENSORLG00000001654	10	6744174	6746540	1	ENSDARP00000096539	ENSDARG00000071497	14	32883683	32886245	-1
ENSORLP00000002058	ENSORLG00000001659	10	6811316	6812383	1	ENSDARP00000057295	ENSDARG00000039218	14	32759880	32761193	-1
ENSORLP00000002081	ENSORLG00000001679	10	6816098	6831412	-1	ENSDARP00000039879	ENSDARG00000034943	14	32734497	32751543	1
ENSORLP00000002104	ENSORLG00000001692	10	6833664	6837064	1	ENSDARP00000009865	ENSDARG00000014244	14	32727957	32731318	-1
ENSORLP00000002163	ENSORLG00000001738	10	6842563	6870118	1	ENSDARP00000007758	ENSDARG00000006683	14	32672823	32724676	-1
ENSORLP00000002171	ENSORLG00000001744	10	6873265	6874656	-1	ENSDARP00000098917	ENSDARG00000079333	14	32658867	32667113	1
ENSORLP00000002180	ENSORLG00000001753	10	6876787	6887384	-1	ENSDARP00000070158	ENSDARG00000036460	14	32636050	32647291	1
ENSORLP00000002197	ENSORLG00000001768	10	6902672	6909050	-1	ENSDARP00000106655	ENSDARG00000087813	14	32591345	32620181	1
Chain ID: 76	Score: 10.00	Medaka: chr13:13,458,607-13,692,922 (0.23 Mb)	Zebrafish: chr18:34,947,149-35,609,845 (0.66 Mb)
ENSORLP00000008247	ENSORLG00000006568	13	13458607	13470155	1	ENSDARP00000082858	ENSDARG00000061742	18	34947149	34970385	1
ENSORLP00000008351	ENSORLG00000006650	13	13493130	13499431	1	ENSDARP00000106290	ENSDARG00000010758	18	35004548	35068996	1
ENSORLP00000008366	ENSORLG00000006665	13	13518209	13519755	1	ENSDARP00000114070	ENSDARG00000055751	18	35109790	35114567	1
ENSORLP00000008383	ENSORLG00000006678	13	13525722	13533008	1	ENSDARP00000018013	ENSDARG00000020611	18	35122766	35139361	1
ENSORLP00000008389	ENSORLG00000006685	13	13537247	13563361	1	ENSDARP00000089728	ENSDARG00000068421	18	35146600	35205222	1
ENSORLP00000008405	ENSORLG00000006697	13	13570386	13609309	-1	ENSDARP00000082742	ENSDARG00000055672	18	35288715	35347130	-1
ENSORLP00000008438	ENSORLG00000006721	13	13643780	13664273	1	ENSDARP00000113742	ENSDARG00000061699	18	35459932	35541386	1
ENSORLP00000008471	ENSORLG00000006752	13	13671599	13677042	1	ENSDARP00000082680	ENSDARG00000061691	18	35559642	35573913	1
ENSORLP00000008483	ENSORLG00000006757	13	13678170	13679844	-1	ENSDARP00000072527	ENSDARG00000068407	18	35577607	35580922	-1
ENSORLP00000008488	ENSORLG00000006762	13	13682262	13686692	-1	ENSDARP00000123087	ENSDARG00000068406	18	35585167	35591813	-1
ENSORLP00000008506	ENSORLG00000006774	13	13689248	13692922	1	ENSDARP00000072516	ENSDARG00000068404	18	35600002	35609845	1
Chain ID: 77	Score: 10.00	Medaka: chr16:16,985,384-17,198,084 (0.21 Mb)	Zebrafish: chr16:19,169,408-19,699,399 (0.53 Mb)
ENSORLP00000014984	ENSORLG00000011961	16	16985384	16991109	-1	ENSDARP00000098618	ENSDARG00000076383	16	19677195	19699399	1
ENSORLP00000014999	ENSORLG00000011975	16	17000436	17002218	1	ENSDARP00000018076	ENSDARG00000018432	16	19642914	19647752	-1
ENSORLP00000015114	ENSORLG00000012073	16	17039183	17045347	1	ENSDARP00000105801	ENSDARG00000062052	16	19612984	19639281	-1
ENSORLP00000015139	ENSORLG00000012097	16	17057728	17076628	1	ENSDARP00000083725	ENSDARG00000012269	16	19539815	19586937	-1
ENSORLP00000015153	ENSORLG00000012107	16	17089505	17093306	-1	ENSDARP00000094525	ENSDARG00000070575	16	19450941	19527792	1
ENSORLP00000015182	ENSORLG00000012132	16	17119281	17124345	1	ENSDARP00000113371	ENSDARG00000075733	16	19364214	19391510	-1
ENSORLP00000015192	ENSORLG00000012141	16	17129057	17134211	1	ENSDARP00000100058	ENSDARG00000076950	16	19325109	19362077	-1
ENSORLP00000015204	ENSORLG00000012153	16	17141902	17149739	1	ENSDARP00000102247	ENSDARG00000043304	16	19296596	19312938	-1
ENSORLP00000015276	ENSORLG00000012204	16	17174410	17175008	1	ENSDARP00000107472	ENSDARG00000043460	16	19266045	19266543	-1
ENSORLP00000015300	ENSORLG00000012224	16	17177926	17180991	1	ENSDARP00000063799	ENSDARG00000043457	16	19254603	19258850	-1
ENSORLP00000015328	ENSORLG00000012248	16	17185436	17192918	1	ENSDARP00000083819	ENSDARG00000062108	16	19183852	19224185	-1
ENSORLP00000015333	ENSORLG00000012255	16	17196350	17198084	1	ENSDARP00000117346	ENSDARG00000094366	16	19169408	19177299	-1
Chain ID: 78	Score: 10.00	Medaka: chr17:5,888,505-6,070,788 (0.18 Mb)	Zebrafish: chr2:10,072,080-10,668,533 (0.60 Mb)
ENSORLP00000006246	ENSORLG00000004956	17	5888505	5891728	1	ENSDARP00000032739	ENSDARG00000023584	2	10655486	10668533	-1
ENSORLP00000006297	ENSORLG00000004994	17	5892284	5901847	-1	ENSDARP00000075537	ENSDARG00000058267	2	10612911	10648568	1
ENSORLP00000006356	ENSORLG00000005042	17	5903136	5911271	1	ENSDARP00000056033	ENSDARG00000038397	2	10582888	10612333	-1
ENSORLP00000006377	ENSORLG00000005060	17	5911889	5913902	-1	ENSDARP00000017502	ENSDARG00000020746	2	10563150	10576780	1
ENSORLP00000006415	ENSORLG00000005089	17	5938445	5940999	-1	ENSDARP00000086003	ENSDARG00000062955	2	10433683	10477040	1
ENSORLP00000006459	ENSORLG00000005121	17	5949079	5961988	1	ENSDARP00000109280	ENSDARG00000005590	2	10399305	10423514	-1
ENSORLP00000006472	ENSORLG00000005133	17	5971811	5983160	1	ENSDARP00000118802	ENSDARG00000078822	2	10259941	10354860	-1
ENSORLP00000006546	ENSORLG00000005190	17	5993434	6002878	1	ENSDARP00000075639	ENSDARG00000058348	2	10188316	10234554	-1
ENSORLP00000006597	ENSORLG00000005229	17	6004395	6042603	1	ENSDARP00000016104	ENSDARG00000009534	2	10134271	10177916	-1
ENSORLP00000006607	ENSORLG00000005240	17	6044037	6065432	1	ENSDARP00000124088	ENSDARG00000003375	2	10079740	10082742	-1
ENSORLP00000006614	ENSORLG00000005244	17	6070075	6070788	-1	ENSDARP00000063995	ENSDARG00000043581	2	10072080	10075228	1
Chain ID: 79	Score: 10.00	Medaka: chr19:17,099,770-17,531,566 (0.43 Mb)	Zebrafish: chr12:29,917,714-30,429,214 (0.51 Mb)
ENSORLP00000015128	ENSORLG00000012086	19	17099770	17100702	1	ENSDARP00000129165	ENSDARG00000045087	12	29917714	29918765	1
ENSORLP00000015232	ENSORLG00000012173	19	17266712	17271715	-1	ENSDARP00000012861	ENSDARG00000020876	12	30109940	30119024	-1
ENSORLP00000015253	ENSORLG00000012187	19	17341306	17372112	1	ENSDARP00000127108	ENSDARG00000061473	12	30165379	30224279	1
ENSORLP00000015259	ENSORLG00000012193	19	17446168	17450260	1	ENSDARP00000006762	ENSDARG00000004473	12	30297386	30318564	1
ENSORLP00000015321	ENSORLG00000012241	19	17458101	17470499	-1	ENSDARP00000013230	ENSDARG00000012981	12	30322577	30340949	-1
ENSORLP00000015343	ENSORLG00000012265	19	17480358	17483488	-1	ENSDARP00000066302	ENSDARG00000045091	12	30344853	30347789	-1
ENSORLP00000015379	ENSORLG00000012287	19	17483869	17489261	1	ENSDARP00000011179	ENSDARG00000017612	12	30348320	30354051	1
ENSORLP00000015388	ENSORLG00000012296	19	17491241	17491573	-1	ENSDARP00000119908	ENSDARG00000029308	12	30357662	30357976	-1
ENSORLP00000015427	ENSORLG00000012325	19	17500026	17511603	1	ENSDARP00000114762	ENSDARG00000045092	12	30374089	30383241	1
ENSORLP00000015446	ENSORLG00000012340	19	17513899	17519022	1	ENSDARP00000103041	ENSDARG00000076533	12	30403635	30411637	1
ENSORLP00000015475	ENSORLG00000012360	19	17525504	17531566	-1	ENSDARP00000113004	ENSDARG00000054442	12	30419558	30429214	-1
Chain ID: 80	Score: 10.00	Medaka: chr20:17,659,025-18,129,137 (0.47 Mb)	Zebrafish: chr7:41,486,722-43,744,035 (2.26 Mb)
ENSORLP00000013059	ENSORLG00000010423	20	17659025	17665156	1	ENSDARP00000104993	ENSDARG00000010658	7	43739769	43744035	-1
ENSORLP00000013077	ENSORLG00000010437	20	17677384	17679734	1	ENSDARP00000028905	ENSDARG00000026599	7	43720323	43722766	-1
ENSORLP00000013115	ENSORLG00000010463	20	17736421	17742128	-1	ENSDARP00000125090	ENSDARG00000068567	7	43613958	43619947	1
ENSORLP00000013130	ENSORLG00000010475	20	17804591	17816721	1	ENSDARP00000078614	ENSDARG00000060035	7	42111599	42131597	-1
ENSORLP00000013202	ENSORLG00000010531	20	17819484	17852702	-1	ENSDARP00000044496	ENSDARG00000024092	7	42050676	42103788	1
ENSORLP00000013214	ENSORLG00000010541	20	17853155	17860182	1	ENSDARP00000122404	ENSDARG00000060027	7	42037716	42047959	-1
ENSORLP00000013224	ENSORLG00000010549	20	17862013	17863745	-1	ENSDARP00000052235	ENSDARG00000035984	7	42031015	42033278	1
ENSORLP00000013264	ENSORLG00000010581	20	17868214	17894023	1	ENSDARP00000111196	ENSDARG00000035978	7	41978500	42021917	-1
ENSORLP00000013310	ENSORLG00000010614	20	17903916	17909050	1	ENSDARP00000108675	ENSDARG00000020953	7	41931263	41962599	-1
ENSORLP00000013317	ENSORLG00000010623	20	17944318	17963336	-1	ENSDARP00000052221	ENSDARG00000035970	7	41621216	41891267	1
ENSORLP00000013372	ENSORLG00000010666	20	18066049	18077724	-1	ENSDARP00000078525	ENSDARG00000060023	7	41598457	41619721	1
ENSORLP00000013464	ENSORLG00000010740	20	18113602	18121969	1	ENSDARP00000101882	ENSDARG00000076934	7	41516252	41537479	-1
ENSORLP00000013485	ENSORLG00000010754	20	18126976	18129137	-1	ENSDARP00000053010	ENSDARG00000036493	7	41486722	41493416	1
Chain ID: 81	Score: 10.00	Medaka: chr24:5,639,947-5,921,894 (0.28 Mb)	Zebrafish: chr20:13,275,430-13,968,833 (0.69 Mb)
ENSORLP00000015116	ENSORLG00000012076	24	5639947	5671488	-1	ENSDARP00000063815	ENSDARG00000043466	20	13275430	13309554	-1
ENSORLP00000015127	ENSORLG00000012085	24	5697725	5716982	1	ENSDARP00000112341	ENSDARG00000005789	20	13318106	13435079	1
ENSORLP00000015132	ENSORLG00000012091	24	5721256	5723151	1	ENSDARP00000114735	ENSDARG00000043468	20	13448392	13480184	1
ENSORLP00000015173	ENSORLG00000012128	24	5726848	5748803	-1	ENSDARP00000073352	ENSDARG00000025091	20	13483693	13538571	-1
ENSORLP00000015190	ENSORLG00000012139	24	5762523	5765937	-1	ENSDARP00000106388	ENSDARG00000043475	20	13564497	13637154	-1
ENSORLP00000015194	ENSORLG00000012144	24	5782603	5786893	-1	ENSDARP00000122580	ENSDARG00000043479	20	13669643	13680523	-1
ENSORLP00000015288	ENSORLG00000012213	24	5838267	5873822	1	ENSDARP00000115456	ENSDARG00000013542	20	13698002	13787159	1
ENSORLP00000015315	ENSORLG00000012239	24	5878725	5881692	1	ENSDARP00000020452	ENSDARG00000005619	20	13798161	13808182	1
ENSORLP00000015324	ENSORLG00000012247	24	5882760	5885152	1	ENSDARP00000022487	ENSDARG00000005463	20	13809090	13827258	1
ENSORLP00000015331	ENSORLG00000012253	24	5912066	5913644	-1	ENSDARP00000127061	ENSDARG00000043485	20	13918481	13927430	-1
ENSORLP00000015377	ENSORLG00000012284	24	5915868	5921894	-1	ENSDARP00000015966	ENSDARG00000019253	20	13931443	13968833	-1
Chain ID: 82	Score: 10.00	Medaka: chr4:32,083,570-32,757,678 (0.67 Mb)	Zebrafish: chr22:21,577,634-22,622,561 (1.04 Mb)
ENSORLP00000021017	ENSORLG00000016794	4	32083570	32121959	1	ENSDARP00000123096	ENSDARG00000056530	22	21577634	21624726	1
ENSORLP00000021026	ENSORLG00000016805	4	32131712	32133053	1	ENSDARP00000027071	ENSDARG00000021432	22	21627517	21633287	1
ENSORLP00000021050	ENSORLG00000016822	4	32146991	32161067	1	ENSDARP00000083719	ENSDARG00000062080	22	21647823	21673243	1
ENSORLP00000021059	ENSORLG00000016833	4	32168342	32187664	-1	ENSDARP00000121086	ENSDARG00000062103	22	21681260	21714522	-1
ENSORLP00000021065	ENSORLG00000016840	4	32192966	32218722	1	ENSDARP00000083841	ENSDARG00000062109	22	21721362	21786813	1
ENSORLP00000021068	ENSORLG00000016841	4	32234420	32235103	-1	ENSDARP00000113862	ENSDARG00000042470	22	21797422	21798609	-1
ENSORLP00000021083	ENSORLG00000016852	4	32302888	32307133	1	ENSDARP00000122861	ENSDARG00000028896	22	21871575	21905801	1
ENSORLP00000021088	ENSORLG00000016856	4	32347497	32372154	1	ENSDARP00000117865	ENSDARG00000042484	22	21940495	21988903	1
ENSORLP00000021096	ENSORLG00000016862	4	32384021	32404887	-1	ENSDARP00000096338	ENSDARG00000008767	22	21994430	22060847	-1
ENSORLP00000021128	ENSORLG00000016885	4	32562999	32592145	-1	ENSDARP00000123118	ENSDARG00000010002	22	22173887	22218977	-1
ENSORLP00000021134	ENSORLG00000016897	4	32692207	32693451	-1	ENSDARP00000104354	ENSDARG00000079876	22	22492744	22494024	-1
ENSORLP00000021190	ENSORLG00000016931	4	32721044	32742237	-1	ENSDARP00000096357	ENSDARG00000071424	22	22535689	22595056	-1
ENSORLP00000021203	ENSORLG00000016948	4	32749330	32757678	-1	ENSDARP00000103259	ENSDARG00000019530	22	22598054	22622561	-1
Chain ID: 83	Score: 10.00	Medaka: chr7:14,998,949-15,837,007 (0.84 Mb)	Zebrafish: chr23:2,689,107-4,273,673 (1.58 Mb)
ENSORLP00000011628	ENSORLG00000009271	7	14998949	15008679	1	ENSDARP00000112273	ENSDARG00000091528	23	2689107	2708160	1
ENSORLP00000011680	ENSORLG00000009314	7	15025079	15037644	1	ENSDARP00000122700	ENSDARG00000086775	23	2770443	2786886	1
ENSORLP00000011762	ENSORLG00000009380	7	15041230	15068307	1	ENSDARP00000012165	ENSDARG00000038442	23	2802036	2880768	1
ENSORLP00000011781	ENSORLG00000009397	7	15073165	15078386	-1	ENSDARP00000005108	ENSDARG00000019774	23	2886987	2890238	-1
ENSORLP00000011861	ENSORLG00000009467	7	15094286	15102677	1	ENSDARP00000087111	ENSDARG00000063419	23	2927690	2944744	1
ENSORLP00000011879	ENSORLG00000009479	7	15318973	15320052	-1	ENSDARP00000018087	ENSDARG00000017121	23	3422313	3423383	-1
ENSORLP00000011918	ENSORLG00000009506	7	15366060	15371331	-1	ENSDARP00000015024	ENSDARG00000009886	23	3517347	3524785	-1
ENSORLP00000011927	ENSORLG00000009514	7	15373565	15375667	1	ENSDARP00000086690	ENSDARG00000063250	23	3531354	3534547	1
ENSORLP00000011943	ENSORLG00000009521	7	15560871	15584041	-1	ENSDARP00000099163	ENSDARG00000078369	23	3789990	3814178	-1
ENSORLP00000011959	ENSORLG00000009537	7	15693590	15710863	-1	ENSDARP00000027230	ENSDARG00000020699	23	4004778	4057523	-1
ENSORLP00000011971	ENSORLG00000009547	7	15733658	15738170	1	ENSDARP00000055098	ENSDARG00000037815	23	4073198	4121575	1
ENSORLP00000011977	ENSORLG00000009555	7	15750063	15763652	-1	ENSDARP00000103682	ENSDARG00000076299	23	4139420	4165307	-1
ENSORLP00000011996	ENSORLG00000009569	7	15835244	15837007	-1	ENSDARP00000013455	ENSDARG00000018658	23	4267466	4273673	-1
Chain ID: 84	Score: 10.00	Medaka: chr8:8,047,204-8,313,610 (0.27 Mb)	Zebrafish: chr3:44,985,468-46,441,823 (1.46 Mb)
ENSORLP00000006214	ENSORLG00000004935	8	8047204	8065668	1	ENSDARP00000077475	ENSDARG00000059616	3	44985468	45038758	1
ENSORLP00000006234	ENSORLG00000004951	8	8110004	8122605	-1	ENSDARP00000097526	ENSDARG00000074017	3	45233332	45283720	-1
ENSORLP00000006317	ENSORLG00000005008	8	8137810	8160718	1	ENSDARP00000129396	ENSDARG00000079264	3	45470804	45577854	1
ENSORLP00000006323	ENSORLG00000005018	8	8217249	8218392	1	ENSDARP00000113473	ENSDARG00000059610	3	45752453	45753454	1
ENSORLP00000006336	ENSORLG00000005027	8	8225078	8226391	1	ENSDARP00000070486	ENSDARG00000074661	3	45806068	45807129	1
ENSORLP00000006392	ENSORLG00000005070	8	8230714	8237514	1	ENSDARP00000128296	ENSDARG00000037838	3	45816923	45851429	1
ENSORLP00000006397	ENSORLG00000005077	8	8246929	8248563	-1	ENSDARP00000122885	ENSDARG00000037836	3	45884312	45886156	-1
ENSORLP00000006400	ENSORLG00000005079	8	8261224	8273055	-1	ENSDARP00000069025	ENSDARG00000052642	3	46082078	46153131	-1
ENSORLP00000006425	ENSORLG00000005094	8	8289794	8298329	1	ENSDARP00000099485	ENSDARG00000076867	3	46342532	46401191	1
ENSORLP00000006436	ENSORLG00000005104	8	8305079	8307060	-1	ENSDARP00000006492	ENSDARG00000020363	3	46415667	46417804	-1
ENSORLP00000006444	ENSORLG00000005109	8	8307897	8308854	1	ENSDARP00000055128	ENSDARG00000037835	3	46418349	46422047	1
ENSORLP00000006451	ENSORLG00000005116	8	8310295	8313610	-1	ENSDARP00000068911	ENSDARG00000076118	3	46427156	46441823	-1
Chain ID: 85	Score: 9.75	Medaka: chr4:2,842,703-3,141,981 (0.30 Mb)	Zebrafish: chr6:26,860,168-27,633,398 (0.77 Mb)
ENSORLP00000001125	ENSORLG00000000923	4	2842703	2848314	-1	ENSDARP00000109882	ENSDARG00000056862	6	27605541	27633398	1
ENSORLP00000001140	ENSORLG00000000937	4	2857571	2879619	-1	ENSDARP00000049176	ENSDARG00000034522	6	27375694	27582442	1
ENSORLP00000001215	ENSORLG00000000985	4	2906540	2919912	-1	ENSDARP00000115216	ENSDARG00000061896	6	27332315	27372202	1
ENSORLP00000001259	ENSORLG00000001023	4	2930186	2954248	-1	ENSDARP00000106622	ENSDARG00000007231	6	27223186	27322667	1
ENSORLP00000001288	ENSORLG00000001045	4	2990809	3015613	-1	ENSDARP00000065254	ENSDARG00000044433	6	27160517	27217866	1
ENSORLP00000001327	ENSORLG00000001073	4	3016776	3033839	-1	ENSDARP00000065237	ENSDARG00000017425	6	27070636	27157948	1
ENSORLP00000001356	ENSORLG00000001097	4	3046002	3049073	-1	ENSDARP00000128127	ENSDARG00000076094	6	27048311	27063525	1
ENSORLP00000001365	ENSORLG00000001107	4	3050250	3072391	-1	ENSDARP00000128338	ENSDARG00000078211	6	27012731	27046272	1
ENSORLP00000001391	ENSORLG00000001126	4	3073072	3085056	-1	ENSDARP00000100066	ENSDARG00000073813	6	26984695	26997112	1
ENSORLP00000001570	ENSORLG00000001265	4	3101585	3141981	-1	ENSDARP00000129632	ENSDARG00000061817	6	26860168	26977482	1
Chain ID: 86	Score: 9.75	Medaka: chr7:11,384,967-11,815,337 (0.43 Mb)	Zebrafish: chr23:26,974,124-27,812,240 (0.84 Mb)
ENSORLP00000008462	ENSORLG00000006734	7	11384967	11394728	1	ENSDARP00000023022	ENSDARG00000014179	23	27794605	27812240	-1
ENSORLP00000008485	ENSORLG00000006758	7	11399290	11409287	1	ENSDARP00000119719	ENSDARG00000078401	23	27752357	27788161	-1
ENSORLP00000008497	ENSORLG00000006768	7	11413715	11415759	1	ENSDARP00000110212	ENSDARG00000003383	23	27739556	27742560	-1
ENSORLP00000008544	ENSORLG00000006799	7	11426321	11434543	1	ENSDARP00000007430	ENSDARG00000011298	23	27688431	27720171	-1
ENSORLP00000008659	ENSORLG00000006887	7	11466985	11489906	1	ENSDARP00000019936	ENSDARG00000005350	23	27600743	27683030	-1
ENSORLP00000008667	ENSORLG00000006898	7	11494438	11498559	-1	ENSDARP00000118661	ENSDARG00000093100	23	27586463	27591466	1
ENSORLP00000008706	ENSORLG00000006930	7	11501780	11540324	1	ENSDARP00000024690	ENSDARG00000005775	23	27492942	27576964	-1
ENSORLP00000008713	ENSORLG00000006937	7	11602265	11604839	1	ENSDARP00000114769	ENSDARG00000057062	23	27375579	27391377	-1
ENSORLP00000008725	ENSORLG00000006945	7	11733310	11739503	-1	ENSDARP00000129409	ENSDARG00000076030	23	27187345	27199694	1
ENSORLP00000008753	ENSORLG00000006969	7	11762248	11791189	1	ENSDARP00000117967	ENSDARG00000027797	23	27037846	27121260	-1
ENSORLP00000008787	ENSORLG00000006993	7	11797573	11805377	1	ENSDARP00000007473	ENSDARG00000014386	23	27005006	27021324	-1
ENSORLP00000008846	ENSORLG00000007039	7	11811142	11815337	-1	ENSDARP00000036893	ENSDARG00000037267	23	26974124	26991195	1
Chain ID: 87	Score: 9.75	Medaka: chr9:7,669,619-8,128,686 (0.46 Mb)	Zebrafish: chr8:32,216,282-33,194,333 (0.98 Mb)
ENSORLP00000004977	ENSORLG00000003982	9	7669619	7670399	-1	ENSDARP00000023235	ENSDARG00000019417	8	32216282	32217137	-1
ENSORLP00000004994	ENSORLG00000003997	9	7679080	7683266	-1	ENSDARP00000103503	ENSDARG00000074087	8	32235605	32241471	-1
ENSORLP00000005007	ENSORLG00000004007	9	7688815	7695253	-1	ENSDARP00000089682	ENSDARG00000068400	8	32254877	32264438	-1
ENSORLP00000005069	ENSORLG00000004053	9	7709415	7727440	-1	ENSDARP00000109597	ENSDARG00000054771	8	32313576	32419602	-1
ENSORLP00000005086	ENSORLG00000004065	9	7745558	7748296	-1	ENSDARP00000123104	ENSDARG00000074170	8	32494073	32549055	-1
ENSORLP00000005103	ENSORLG00000004076	9	7750074	7752427	-1	ENSDARP00000061831	ENSDARG00000054777	8	32553219	32564118	-1
ENSORLP00000005238	ENSORLG00000004185	9	7802520	7824098	1	ENSDARP00000071521	ENSDARG00000054794	8	32669526	32709575	1
ENSORLP00000005246	ENSORLG00000004192	9	7832925	7839222	1	ENSDARP00000118698	ENSDARG00000042172	8	32721034	32746890	1
ENSORLP00000005270	ENSORLG00000004208	9	7841176	7848294	-1	ENSDARP00000080008	ENSDARG00000060601	8	32750258	32767270	-1
ENSORLP00000005281	ENSORLG00000004220	9	7866481	7867764	1	ENSDARP00000121666	ENSDARG00000093745	8	32789794	32790990	1
ENSORLP00000005343	ENSORLG00000004267	9	8019722	8128686	-1	ENSDARP00000045294	ENSDARG00000054224	8	32878886	33194333	-1
Chain ID: 88	Score: 9.50	Medaka: chr10:13,762,652-14,235,746 (0.47 Mb)	Zebrafish: chr14:10,859,662-12,220,769 (1.36 Mb)
ENSORLP00000007639	ENSORLG00000006075	10	13762652	13793932	1	ENSDARP00000105895	ENSDARG00000042236	14	10859662	10934473	1
ENSORLP00000007650	ENSORLG00000006087	10	13797026	13799816	-1	ENSDARP00000061927	ENSDARG00000042233	14	10951124	10961218	-1
ENSORLP00000007694	ENSORLG00000006120	10	13857770	13888069	1	ENSDARP00000085602	ENSDARG00000062795	14	11180365	11268306	1
ENSORLP00000007696	ENSORLG00000006123	10	13962614	13966462	1	ENSDARP00000047815	ENSDARG00000029296	14	11459550	11463248	1
ENSORLP00000007705	ENSORLG00000006129	10	13976013	13979594	1	ENSDARP00000100039	ENSDARG00000079306	14	11489457	11499758	1
ENSORLP00000007718	ENSORLG00000006138	10	13981535	13982719	1	ENSDARP00000097435	ENSDARG00000071871	14	11594121	11597940	1
ENSORLP00000007735	ENSORLG00000006152	10	13994181	13996961	-1	ENSDARP00000085591	ENSDARG00000062788	14	11626046	11629084	-1
ENSORLP00000007759	ENSORLG00000006169	10	14015022	14018676	-1	ENSDARP00000097499	ENSDARG00000077169	14	11649673	11655264	-1
ENSORLP00000007770	ENSORLG00000006177	10	14019892	14020800	1	ENSDARP00000075482	ENSDARG00000058206	14	11656673	11659459	1
ENSORLP00000007780	ENSORLG00000006186	10	14022568	14023863	-1	ENSDARP00000099599	ENSDARG00000073820	14	11703914	11705314	-1
ENSORLP00000007794	ENSORLG00000006198	10	14219534	14235746	1	ENSDARP00000098126	ENSDARG00000074865	14	12170666	12220769	1
Chain ID: 89	Score: 9.50	Medaka: chr15:25,768,278-26,021,952 (0.25 Mb)	Zebrafish: chr13:4,023,148-4,756,147 (0.73 Mb)
ENSORLP00000014082	ENSORLG00000011232	15	25768278	25772526	1	ENSDARP00000097824	ENSDARG00000007362	13	4023148	4053398	1
ENSORLP00000014085	ENSORLG00000011234	15	25785233	25785949	1	ENSDARP00000118798	ENSDARG00000093768	13	4060128	4060740	1
ENSORLP00000014116	ENSORLG00000011262	15	25799679	25804288	1	ENSDARP00000129298	ENSDARG00000039806	13	4095611	4108100	1
ENSORLP00000014230	ENSORLG00000011357	15	25826564	25862319	1	ENSDARP00000027138	ENSDARG00000003449	13	4159972	4275009	1
ENSORLP00000014264	ENSORLG00000011391	15	25876406	25879511	-1	ENSDARP00000107933	ENSDARG00000087227	13	4340187	4359005	-1
ENSORLP00000014272	ENSORLG00000011399	15	25890690	25895221	-1	ENSDARP00000108433	ENSDARG00000026804	13	4377025	4503522	-1
ENSORLP00000014303	ENSORLG00000011421	15	25963192	25996250	1	ENSDARP00000121050	ENSDARG00000063358	13	4560135	4645210	1
ENSORLP00000014315	ENSORLG00000011433	15	26003833	26005796	-1	ENSDARP00000093426	ENSDARG00000024561	13	4650665	4669016	-1
ENSORLP00000014320	ENSORLG00000011435	15	26006653	26006991	1	ENSDARP00000057773	ENSDARG00000039543	13	4672218	4672574	1
ENSORLP00000014343	ENSORLG00000011454	15	26010251	26016030	1	ENSDARP00000045068	ENSDARG00000013968	13	4681675	4704869	1
ENSORLP00000014371	ENSORLG00000011475	15	26018476	26021952	-1	ENSDARP00000098767	ENSDARG00000077828	13	4749364	4756147	-1
Chain ID: 90	Score: 9.50	Medaka: chr16:20,874,044-21,412,440 (0.54 Mb)	Zebrafish: chr16:35,417,785-36,341,618 (0.92 Mb)
ENSORLP00000018355	ENSORLG00000014645	16	20874044	20886924	-1	ENSDARP00000069707	ENSDARG00000053225	16	36207494	36341618	1
ENSORLP00000018367	ENSORLG00000014653	16	20925341	20936721	1	ENSDARP00000058458	ENSDARG00000039957	16	36088753	36119680	-1
ENSORLP00000018391	ENSORLG00000014671	16	20951523	20958599	-1	ENSDARP00000121030	ENSDARG00000034643	16	36033837	36049142	1
ENSORLP00000018427	ENSORLG00000014702	16	21037991	21041683	1	ENSDARP00000058459	ENSDARG00000039958	16	35959576	35964091	-1
ENSORLP00000018435	ENSORLG00000014708	16	21071332	21072465	-1	ENSDARP00000027757	ENSDARG00000009823	16	35906889	35907995	1
ENSORLP00000018476	ENSORLG00000014744	16	21328535	21329158	-1	ENSDARP00000106367	ENSDARG00000069830	16	35471714	35473210	1
ENSORLP00000018488	ENSORLG00000014754	16	21333445	21338999	-1	ENSDARP00000123618	ENSDARG00000069833	16	35457977	35464946	1
ENSORLP00000018515	ENSORLG00000014770	16	21341717	21349464	-1	ENSDARP00000104170	ENSDARG00000039969	16	35435112	35453821	1
ENSORLP00000018528	ENSORLG00000014779	16	21352104	21353350	-1	ENSDARP00000058472	ENSDARG00000039970	16	35425608	35428668	1
ENSORLP00000018533	ENSORLG00000014784	16	21411979	21412440	1	ENSDARP00000113947	ENSDARG00000053291	16	35417785	35418231	-1
Chain ID: 91	Score: 9.50	Medaka: chr16:14,327,171-14,605,543 (0.28 Mb)	Zebrafish: chr16:29,101,927-29,809,511 (0.71 Mb)
ENSORLP00000010853	ENSORLG00000008652	16	14327171	14329115	-1	ENSDARP00000072582	ENSDARG00000055719	16	29101927	29106622	-1
ENSORLP00000010915	ENSORLG00000008696	16	14367766	14381730	1	ENSDARP00000116122	ENSDARG00000061335	16	29225383	29349179	1
ENSORLP00000010943	ENSORLG00000008717	16	14414870	14417638	-1	ENSDARP00000094034	ENSDARG00000070399	16	29444739	29452345	-1
ENSORLP00000010951	ENSORLG00000008724	16	14418620	14422654	1	ENSDARP00000059012	ENSDARG00000076568	16	29452701	29459618	1
ENSORLP00000010966	ENSORLG00000008732	16	14521868	14531778	1	ENSDARP00000072712	ENSDARG00000055854	16	29573622	29596118	1
ENSORLP00000010988	ENSORLG00000008748	16	14539349	14548149	1	ENSDARP00000114720	ENSDARG00000006869	16	29613216	29633208	1
ENSORLP00000011021	ENSORLG00000008774	16	14550022	14561750	-1	ENSDARP00000017258	ENSDARG00000019008	16	29646207	29670495	-1
ENSORLP00000011032	ENSORLG00000008786	16	14567307	14577709	1	ENSDARP00000014904	ENSDARG00000002213	16	29672438	29730459	1
ENSORLP00000011062	ENSORLG00000008812	16	14578489	14587341	-1	ENSDARP00000072745	ENSDARG00000055885	16	29736716	29770763	-1
ENSORLP00000011069	ENSORLG00000008817	16	14593937	14594823	1	ENSDARP00000118446	ENSDARG00000091631	16	29772133	29786812	1
ENSORLP00000011096	ENSORLG00000008841	16	14596866	14605543	1	ENSDARP00000097770	ENSDARG00000076752	16	29791073	29809511	1
Chain ID: 92	Score: 9.50	Medaka: chr21:11,573,591-12,126,271 (0.55 Mb)	Zebrafish: chr9:6,123,512-7,328,624 (1.21 Mb)
ENSORLP00000015340	ENSORLG00000012263	21	11573591	11576896	1	ENSDARP00000111311	ENSDARG00000044766	9	7317815	7328624	-1
ENSORLP00000015372	ENSORLG00000012285	21	11594006	11599766	1	ENSDARP00000116391	ENSDARG00000000666	9	7271042	7280317	-1
ENSORLP00000015424	ENSORLG00000012322	21	11626615	11643208	1	ENSDARP00000123093	ENSDARG00000063330	9	7138511	7254489	-1
ENSORLP00000015505	ENSORLG00000012384	21	11674657	11690171	-1	ENSDARP00000116716	ENSDARG00000063352	9	7071632	7108296	1
ENSORLP00000015518	ENSORLG00000012399	21	11726140	11748742	1	ENSDARP00000076157	ENSDARG00000058780	9	7004716	7032979	-1
ENSORLP00000015529	ENSORLG00000012409	21	11752304	11760574	-1	ENSDARP00000103276	ENSDARG00000074728	9	6979035	6998065	1
ENSORLP00000015561	ENSORLG00000012431	21	11762394	11772308	1	ENSDARP00000059091	ENSDARG00000040374	9	6957893	6968845	-1
ENSORLP00000015584	ENSORLG00000012448	21	11816854	11818878	1	ENSDARP00000061592	ENSDARG00000042032	9	6700570	6702131	-1
ENSORLP00000015601	ENSORLG00000012460	21	11840923	11845790	1	ENSDARP00000061584	ENSDARG00000042025	9	6649265	6659068	-1
ENSORLP00000015680	ENSORLG00000012524	21	11976081	12040694	-1	ENSDARP00000072986	ENSDARG00000056102	9	6297280	6410825	1
ENSORLP00000015692	ENSORLG00000012534	21	12054839	12086491	1	ENSDARP00000030023	ENSDARG00000027822	9	6159399	6248320	-1
ENSORLP00000015721	ENSORLG00000012556	21	12090219	12126271	-1	ENSDARP00000122397	ENSDARG00000039335	9	6123512	6164114	1
Chain ID: 93	Score: 9.50	Medaka: chr6:14,187,873-14,372,897 (0.19 Mb)	Zebrafish: chr18:5,565,892-6,115,928 (0.55 Mb)
ENSORLP00000011178	ENSORLG00000008908	6	14187873	14192978	1	ENSDARP00000087184	ENSDARG00000063457	18	5565892	5584897	1
ENSORLP00000011208	ENSORLG00000008936	6	14193677	14199605	-1	ENSDARP00000025514	ENSDARG00000011072	18	5589187	5620202	-1
ENSORLP00000011259	ENSORLG00000008977	6	14200611	14205078	1	ENSDARP00000124772	ENSDARG00000008447	18	5622466	5635575	1
ENSORLP00000011425	ENSORLG00000009109	6	14275917	14282185	1	ENSDARP00000106339	ENSDARG00000078094	18	5792228	5813786	1
ENSORLP00000011471	ENSORLG00000009141	6	14283072	14285368	-1	ENSDARP00000115890	ENSDARG00000002764	18	5818540	5828173	-1
ENSORLP00000011476	ENSORLG00000009147	6	14289188	14295018	-1	ENSDARP00000120251	ENSDARG00000078875	18	5839991	5852291	-1
ENSORLP00000011487	ENSORLG00000009155	6	14298183	14302481	-1	ENSDARP00000113517	ENSDARG00000076548	18	5871577	5889182	-1
ENSORLP00000011560	ENSORLG00000009217	6	14307027	14315780	-1	ENSDARP00000092287	ENSDARG00000069654	18	5901905	5934778	-1
ENSORLP00000011605	ENSORLG00000009254	6	14318779	14322727	1	ENSDARP00000010419	ENSDARG00000010745	18	5943140	5954064	1
ENSORLP00000011666	ENSORLG00000009301	6	14332225	14352798	-1	ENSDARP00000092299	ENSDARG00000078508	18	5986559	6067917	-1
ENSORLP00000011675	ENSORLG00000009308	6	14372166	14372897	-1	ENSDARP00000106302	ENSDARG00000005115	18	6102498	6115928	-1
Chain ID: 94	Score: 9.50	Medaka: chr7:22,729,724-22,943,022 (0.21 Mb)	Zebrafish: chr23:33,588,106-34,140,388 (0.55 Mb)
ENSORLP00000019361	ENSORLG00000015465	7	22729724	22738396	-1	ENSDARP00000094021	ENSDARG00000070395	23	34121674	34140388	1
ENSORLP00000019460	ENSORLG00000015540	7	22774619	22780472	1	ENSDARP00000020703	ENSDARG00000015460	23	33974660	33987449	-1
ENSORLP00000019467	ENSORLG00000015547	7	22782729	22785165	-1	ENSDARP00000014473	ENSDARG00000017811	23	33965971	33971080	1
ENSORLP00000019469	ENSORLG00000015549	7	22785940	22788379	1	ENSDARP00000019400	ENSDARG00000003219	23	33953362	33963803	-1
ENSORLP00000019474	ENSORLG00000015553	7	22808053	22812585	-1	ENSDARP00000004236	ENSDARG00000007867	23	33932431	33941653	1
ENSORLP00000019491	ENSORLG00000015567	7	22815651	22825252	1	ENSDARP00000111302	ENSDARG00000011570	23	33897156	33916488	-1
ENSORLP00000019583	ENSORLG00000015644	7	22831082	22841671	1	ENSDARP00000121618	ENSDARG00000060306	23	33871890	33893157	-1
ENSORLP00000019596	ENSORLG00000015651	7	22846921	22850704	1	ENSDARP00000098109	ENSDARG00000075972	23	33847159	33854630	-1
ENSORLP00000019613	ENSORLG00000015664	7	22888663	22925450	1	ENSDARP00000027718	ENSDARG00000006353	23	33663324	33771617	-1
ENSORLP00000019634	ENSORLG00000015678	7	22928298	22943022	-1	ENSDARP00000098662	ENSDARG00000079291	23	33588106	33657726	1
Chain ID: 95	Score: 9.50	Medaka: chr7:17,688,340-18,066,781 (0.38 Mb)	Zebrafish: chr23:4,428,912-4,951,046 (0.52 Mb)
ENSORLP00000014064	ENSORLG00000011215	7	17688340	17691279	1	ENSDARP00000122255	ENSDARG00000058873	23	4428912	4441089	1
ENSORLP00000014083	ENSORLG00000011233	7	17700054	17710492	-1	ENSDARP00000076262	ENSDARG00000058871	23	4443687	4460786	-1
ENSORLP00000014113	ENSORLG00000011261	7	17710508	17715932	1	ENSDARP00000076260	ENSDARG00000002483	23	4465518	4484395	1
ENSORLP00000014270	ENSORLG00000011390	7	17783472	17810873	1	ENSDARP00000086821	ENSDARG00000063333	23	4534692	4607713	1
ENSORLP00000014295	ENSORLG00000011415	7	17905609	17924546	1	ENSDARP00000086776	ENSDARG00000073822	23	4701075	4731649	1
ENSORLP00000014299	ENSORLG00000011419	7	17931067	17931579	1	ENSDARP00000116308	ENSDARG00000090638	23	4744165	4746962	1
ENSORLP00000014342	ENSORLG00000011453	7	17942387	17943242	-1	ENSDARP00000067292	ENSDARG00000045776	23	4754596	4757729	-1
ENSORLP00000014375	ENSORLG00000011479	7	17965864	17974566	-1	ENSDARP00000067530	ENSDARG00000045945	23	4808331	4831032	-1
ENSORLP00000014401	ENSORLG00000011494	7	17977926	17984080	1	ENSDARP00000112922	ENSDARG00000094332	23	4833955	4839446	1
ENSORLP00000014553	ENSORLG00000011608	7	18034032	18039283	-1	ENSDARP00000110030	ENSDARG00000045944	23	4890290	4910227	-1
ENSORLP00000014571	ENSORLG00000011624	7	18063205	18066781	1	ENSDARP00000025541	ENSDARG00000011400	23	4946466	4951046	1
Chain ID: 96	Score: 9.50	Medaka: chr8:24,226,472-24,601,824 (0.38 Mb)	Zebrafish: chr3:23,876,782-24,374,938 (0.50 Mb)
ENSORLP00000021295	ENSORLG00000017021	8	24226472	24233051	-1	ENSDARP00000128495	ENSDARG00000029215	3	23876782	23887773	-1
ENSORLP00000021300	ENSORLG00000017026	8	24254365	24260778	-1	ENSDARP00000072887	ENSDARG00000056012	3	23933594	23934844	-1
ENSORLP00000021307	ENSORLG00000017031	8	24280190	24281764	1	ENSDARP00000072890	ENSDARG00000056015	3	23945568	23946911	1
ENSORLP00000021315	ENSORLG00000017035	8	24308256	24318774	1	ENSDARP00000007852	ENSDARG00000056023	3	23968742	23972000	1
ENSORLP00000021317	ENSORLG00000017036	8	24361076	24363058	1	ENSDARP00000002263	ENSDARG00000010630	3	23994945	23996685	1
ENSORLP00000021329	ENSORLG00000017046	8	24381089	24384779	1	ENSDARP00000008458	ENSDARG00000013533	3	24013049	24014729	1
ENSORLP00000021331	ENSORLG00000017048	8	24414376	24415239	1	ENSDARP00000072928	ENSDARG00000029263	3	24037376	24039301	1
ENSORLP00000021335	ENSORLG00000017051	8	24421469	24423648	1	ENSDARP00000118498	ENSDARG00000000175	3	24043457	24045536	1
ENSORLP00000021337	ENSORLG00000017053	8	24439937	24441968	1	ENSDARP00000101854	ENSDARG00000008174	3	24060178	24061866	1
ENSORLP00000021341	ENSORLG00000017056	8	24582695	24586195	1	ENSDARP00000118656	ENSDARG00000004189	3	24353992	24361288	1
ENSORLP00000021345	ENSORLG00000017060	8	24594032	24601824	-1	ENSDARP00000106740	ENSDARG00000030616	3	24364947	24374938	-1
Chain ID: 97	Score: 9.25	Medaka: chr10:7,079,661-7,337,716 (0.26 Mb)	Zebrafish: chr14:33,742,371-34,272,205 (0.53 Mb)
ENSORLP00000002306	ENSORLG00000001851	10	7079661	7088780	1	ENSDARP00000069541	ENSDARG00000029885	14	34257482	34272205	-1
ENSORLP00000002317	ENSORLG00000001862	10	7092087	7095758	1	ENSDARP00000048129	ENSDARG00000031929	14	34246497	34252588	-1
ENSORLP00000002326	ENSORLG00000001867	10	7097161	7104173	-1	ENSDARP00000069672	ENSDARG00000053194	14	34239718	34242751	1
ENSORLP00000002342	ENSORLG00000001881	10	7109361	7120362	1	ENSDARP00000100472	ENSDARG00000073870	14	34206705	34229251	-1
ENSORLP00000002407	ENSORLG00000001933	10	7209985	7228287	-1	ENSDARP00000102386	ENSDARG00000078995	14	34024913	34041481	1
ENSORLP00000002414	ENSORLG00000001940	10	7260838	7275515	1	ENSDARP00000007209	ENSDARG00000015815	14	33840326	33899405	-1
ENSORLP00000002441	ENSORLG00000001963	10	7284966	7287400	1	ENSDARP00000052708	ENSDARG00000036292	14	33817324	33820042	-1
ENSORLP00000002447	ENSORLG00000001966	10	7288667	7292849	1	ENSDARP00000069642	ENSDARG00000053166	14	33808109	33814899	-1
ENSORLP00000002456	ENSORLG00000001972	10	7296477	7309613	-1	ENSDARP00000096499	ENSDARG00000071478	14	33782548	33800247	1
ENSORLP00000002459	ENSORLG00000001975	10	7332070	7337716	1	ENSDARP00000104989	ENSDARG00000023055	14	33742371	33750523	-1
Chain ID: 98	Score: 9.25	Medaka: chr15:26,397,165-27,358,703 (0.96 Mb)	Zebrafish: chr13:33,831,514-35,748,991 (1.92 Mb)
ENSORLP00000014864	ENSORLG00000011865	15	26397165	26398359	1	ENSDARP00000006420	ENSDARG00000012972	13	33831514	33833596	1
ENSORLP00000014882	ENSORLG00000011879	15	26399530	26410523	-1	ENSDARP00000118039	ENSDARG00000013763	13	33836632	33861595	-1
ENSORLP00000014946	ENSORLG00000011923	15	26415456	26421118	-1	ENSDARP00000018231	ENSDARG00000020442	13	33871160	33879296	-1
ENSORLP00000014970	ENSORLG00000011947	15	26422950	26424946	1	ENSDARP00000006549	ENSDARG00000016656	13	33880072	33883254	1
ENSORLP00000014981	ENSORLG00000011959	15	26426743	26428143	-1	ENSDARP00000115016	ENSDARG00000077481	13	33883827	33886998	-1
ENSORLP00000015052	ENSORLG00000012021	15	26465506	26470097	1	ENSDARP00000107359	ENSDARG00000008887	13	33913082	33919700	1
ENSORLP00000015062	ENSORLG00000012028	15	26470893	26471922	-1	ENSDARP00000007089	ENSDARG00000020039	13	33920528	33925003	-1
ENSORLP00000015103	ENSORLG00000012063	15	26968707	26987361	1	ENSDARP00000123428	ENSDARG00000060580	13	34913107	34968703	1
ENSORLP00000015112	ENSORLG00000012072	15	26997187	27008437	-1	ENSDARP00000023737	ENSDARG00000020541	13	34988732	35002920	-1
ENSORLP00000015150	ENSORLG00000012104	15	27014666	27037982	-1	ENSDARP00000047551	ENSDARG00000030743	13	35025838	35079247	-1
ENSORLP00000015164	ENSORLG00000012118	15	27117657	27128056	-1	ENSDARP00000109601	ENSDARG00000087517	13	35262853	35272858	-1
ENSORLP00000015240	ENSORLG00000012175	15	27273752	27297384	1	ENSDARP00000008197	ENSDARG00000013168	13	35561037	35608838	1
ENSORLP00000015280	ENSORLG00000012207	15	27341779	27344411	1	ENSDARP00000024495	ENSDARG00000016139	13	35695830	35703380	1
ENSORLP00000015287	ENSORLG00000012215	15	27354457	27358703	-1	ENSDARP00000009876	ENSDARG00000010823	13	35733368	35748991	-1
Chain ID: 99	Score: 9.25	Medaka: chr22:16,804,802-17,366,222 (0.56 Mb)	Zebrafish: chr13:46,051,892-46,747,281 (0.70 Mb)
ENSORLP00000021925	ENSORLG00000017523	22	16804802	16809179	1	ENSDARP00000090723	ENSDARG00000004706	13	46051892	46062959	1
ENSORLP00000021931	ENSORLG00000017529	22	16814415	16816487	-1	ENSDARP00000043344	ENSDARG00000030440	13	46088889	46093372	-1
ENSORLP00000021934	ENSORLG00000017532	22	16826204	16827340	1	ENSDARP00000045328	ENSDARG00000033364	13	46096574	46101661	1
ENSORLP00000021940	ENSORLG00000017537	22	16829299	16831773	1	ENSDARP00000120219	ENSDARG00000015757	13	46108389	46114681	1
ENSORLP00000021945	ENSORLG00000017542	22	16832509	16836356	-1	ENSDARP00000020679	ENSDARG00000002194	13	46117582	46143172	-1
ENSORLP00000021950	ENSORLG00000017545	22	16837283	16852261	1	ENSDARP00000069055	ENSDARG00000012741	13	46144789	46190441	1
ENSORLP00000021957	ENSORLG00000017554	22	16919791	16933276	-1	ENSDARP00000092492	ENSDARG00000069739	13	46353548	46378068	-1
ENSORLP00000021964	ENSORLG00000017556	22	17099991	17101321	1	ENSDARP00000068987	ENSDARG00000052610	13	46534640	46535374	1
ENSORLP00000021974	ENSORLG00000017563	22	17112988	17122252	1	ENSDARP00000003318	ENSDARG00000052623	13	46547737	46566802	1
ENSORLP00000021978	ENSORLG00000017569	22	17364224	17366222	1	ENSDARP00000056986	ENSDARG00000039034	13	46745301	46747281	1
Chain ID: 100	Score: 9.25	Medaka: chr5:7,834,543-8,469,462 (0.63 Mb)	Zebrafish: chr11:666,069-1,364,528 (0.70 Mb)
ENSORLP00000005578	ENSORLG00000004447	5	7834543	7924491	-1	ENSDARP00000085343	ENSDARG00000078971	11	666069	718177	-1
ENSORLP00000005597	ENSORLG00000004459	5	7847593	7870243	1	ENSDARP00000105618	ENSDARG00000090394	11	683264	691984	1
ENSORLP00000005620	ENSORLG00000004476	5	7932793	7939398	1	ENSDARP00000058668	ENSDARG00000040113	11	725708	736850	1
ENSORLP00000005637	ENSORLG00000004490	5	7958942	7976547	1	ENSDARP00000058671	ENSDARG00000040114	11	759737	798681	1
ENSORLP00000005683	ENSORLG00000004519	5	8011384	8062166	-1	ENSDARP00000100881	ENSDARG00000078008	11	831071	882330	-1
ENSORLP00000005724	ENSORLG00000004554	5	8075833	8077829	-1	ENSDARP00000068772	ENSDARG00000052425	11	892247	893851	-1
ENSORLP00000005782	ENSORLG00000004595	5	8153773	8163675	-1	ENSDARP00000005281	ENSDARG00000039647	11	986089	1010481	-1
ENSORLP00000005835	ENSORLG00000004636	5	8217235	8247708	-1	ENSDARP00000106807	ENSDARG00000040435	11	1090557	1119600	-1
ENSORLP00000005976	ENSORLG00000004747	5	8409997	8464683	-1	ENSDARP00000009149	ENSDARG00000007955	11	1302749	1356296	-1
ENSORLP00000005979	ENSORLG00000004752	5	8466897	8469462	-1	ENSDARP00000099277	ENSDARG00000077717	11	1361418	1364528	-1
Chain ID: 101	Score: 9.25	Medaka: chr8:6,132,008-6,426,021 (0.29 Mb)	Zebrafish: chr3:16,462,247-17,355,188 (0.89 Mb)
ENSORLP00000004757	ENSORLG00000003825	8	6132008	6135705	-1	ENSDARP00000110039	ENSDARG00000089463	3	17334062	17355188	1
ENSORLP00000004829	ENSORLG00000003868	8	6138038	6147641	-1	ENSDARP00000011795	ENSDARG00000006017	3	17297713	17323607	1
ENSORLP00000004847	ENSORLG00000003882	8	6150051	6154607	-1	ENSDARP00000033828	ENSDARG00000026712	3	17278820	17294474	1
ENSORLP00000004860	ENSORLG00000003891	8	6161881	6176681	-1	ENSDARP00000127900	ENSDARG00000062565	3	17191399	17244749	1
ENSORLP00000004866	ENSORLG00000003897	8	6179347	6181388	-1	ENSDARP00000095322	ENSDARG00000070932	3	17181277	17185280	1
ENSORLP00000004874	ENSORLG00000003903	8	6234410	6248043	-1	ENSDARP00000085109	ENSDARG00000062575	3	17004309	17166893	1
ENSORLP00000004950	ENSORLG00000003961	8	6300356	6316654	-1	ENSDARP00000022542	ENSDARG00000019392	3	16912928	16975585	1
ENSORLP00000005085	ENSORLG00000004061	8	6358628	6367171	-1	ENSDARP00000095292	ENSDARG00000022712	3	16684543	16726986	1
ENSORLP00000005108	ENSORLG00000004080	8	6372397	6386590	-1	ENSDARP00000099909	ENSDARG00000076411	3	16596521	16631858	1
ENSORLP00000005194	ENSORLG00000004147	8	6417575	6426021	-1	ENSDARP00000010065	ENSDARG00000015922	3	16462247	16491433	1
